# Supplementary material
Source: publisher figshare collection journal article supplement (https://gsajournals.figshare.com/articles/dataset/_/8208569)
Supplement: Supplementary file 1 [file 1]

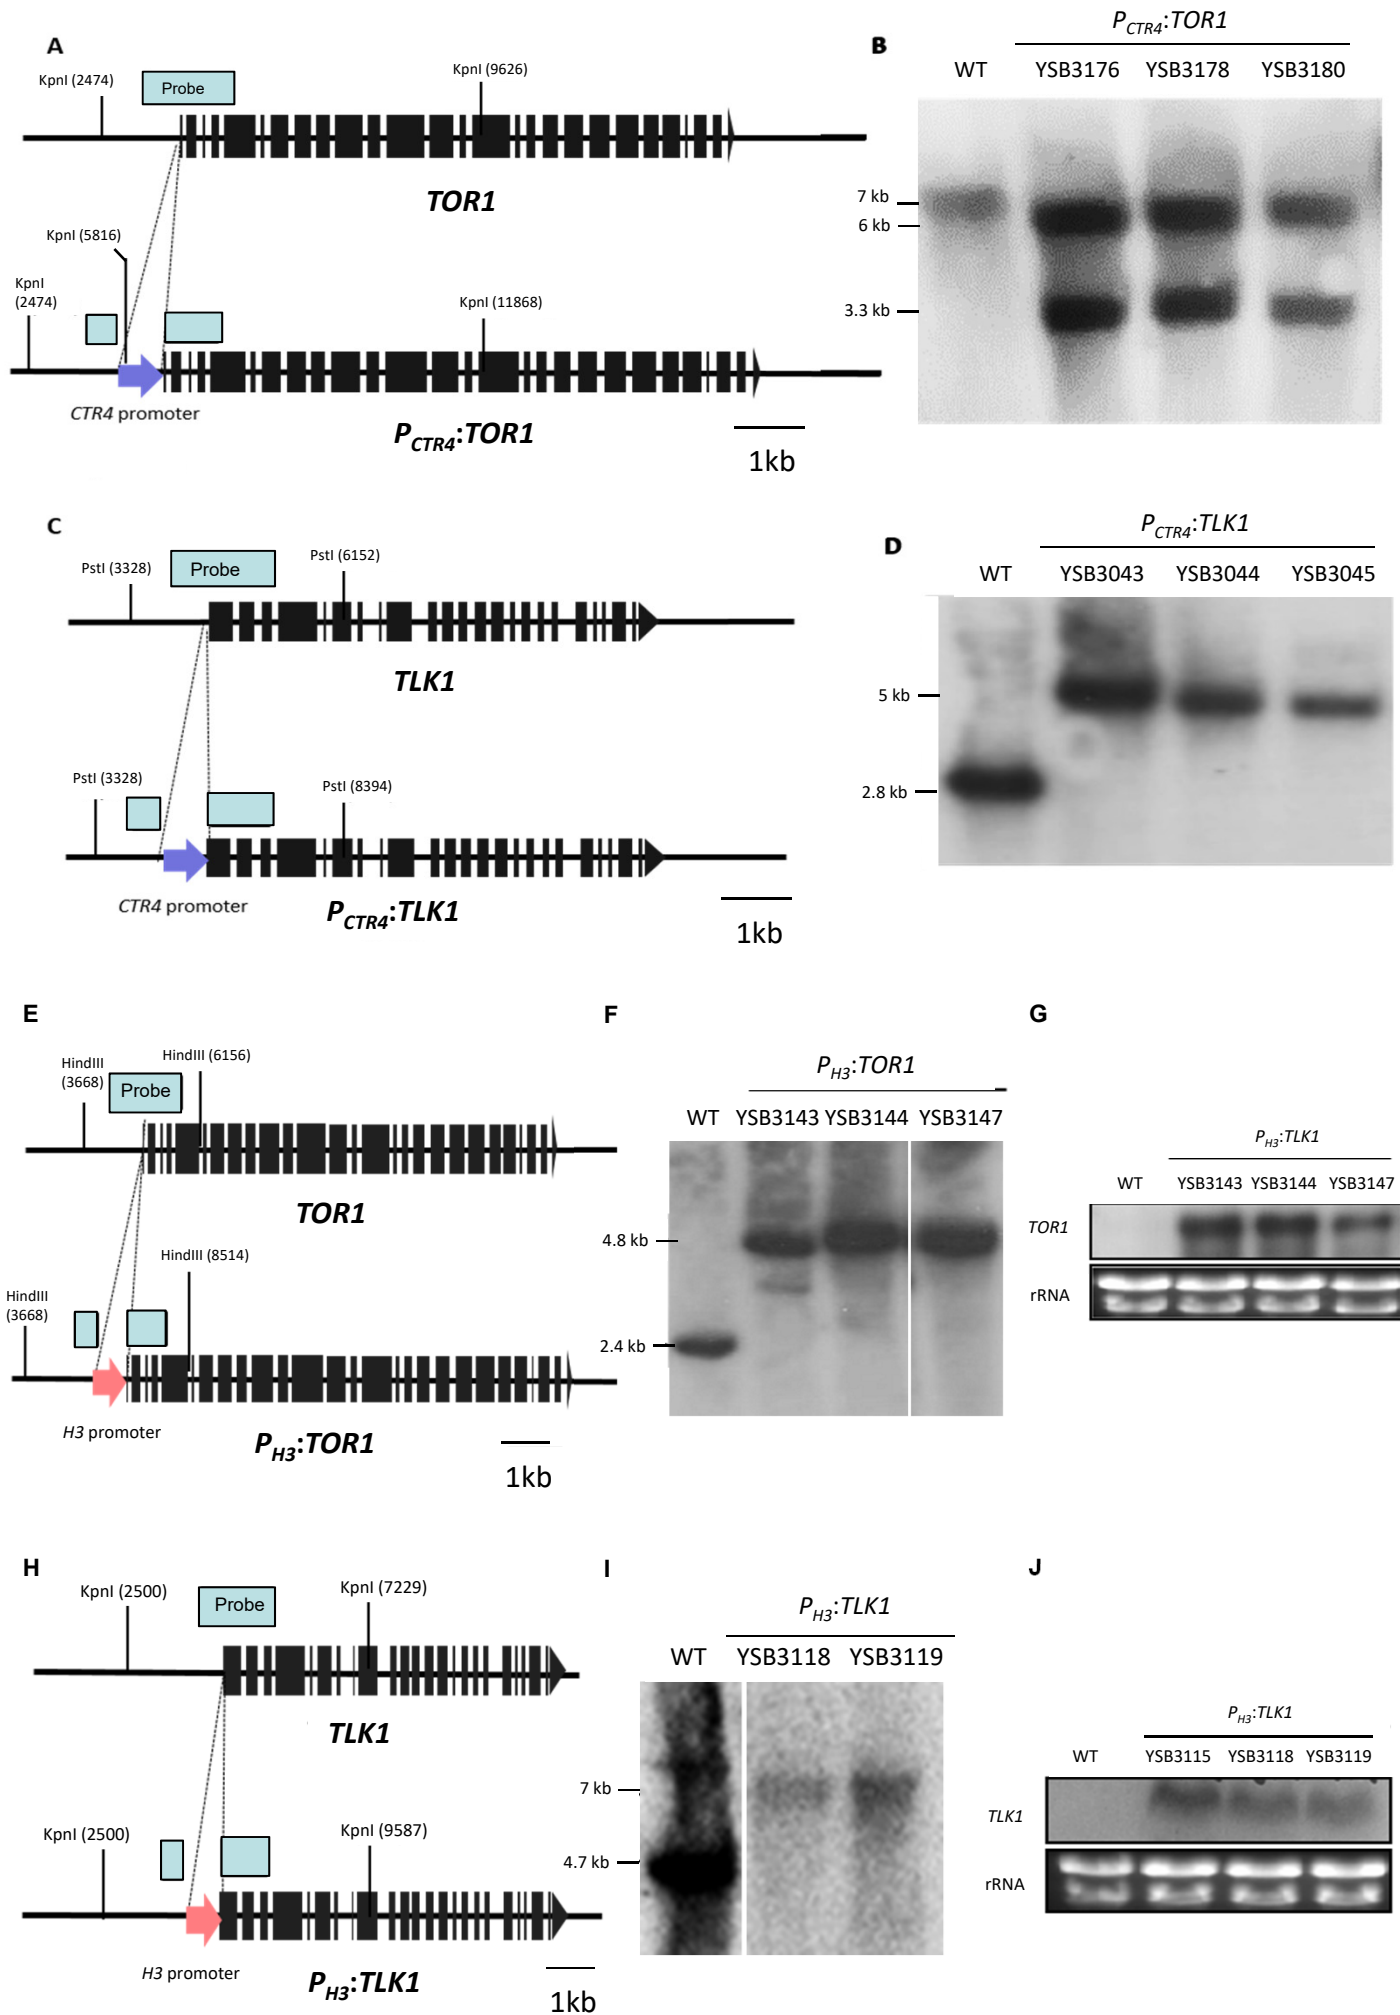

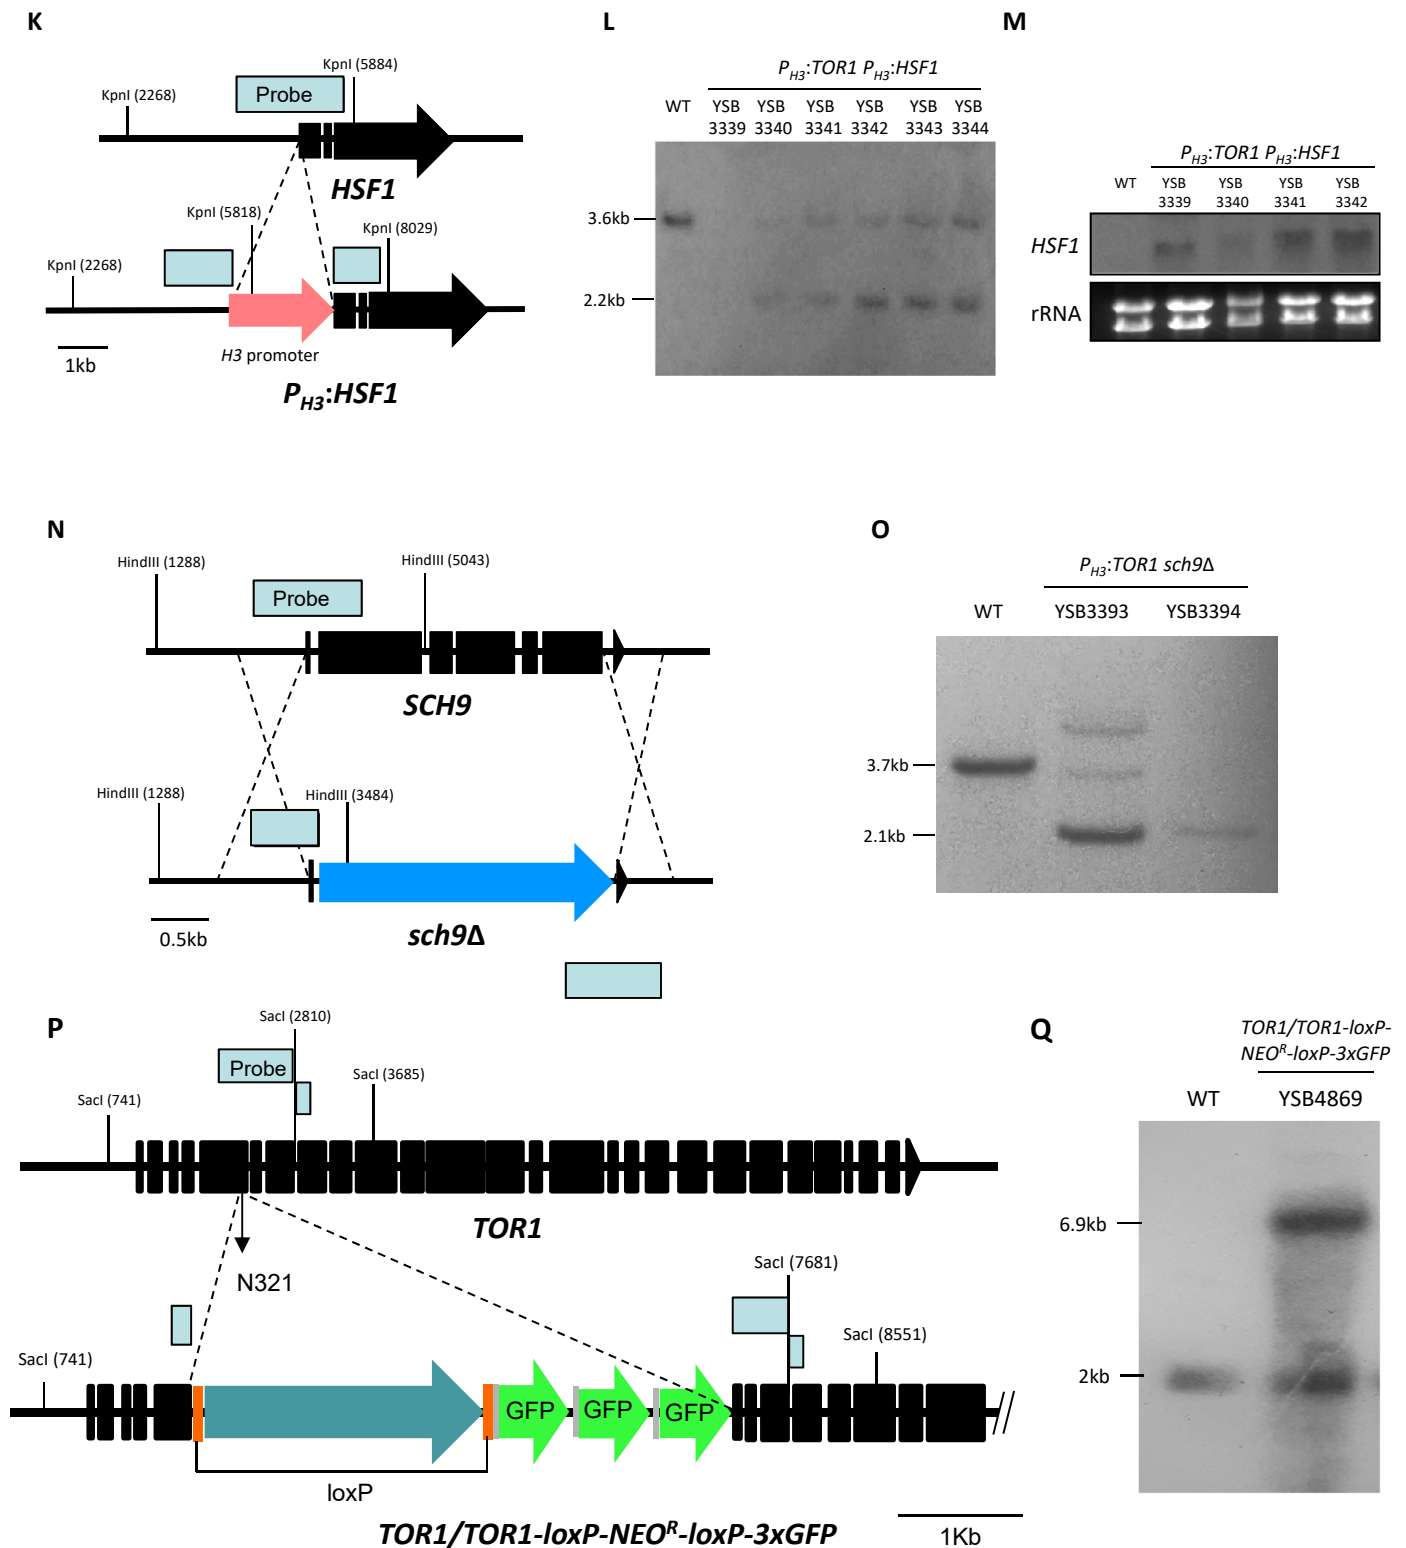

**Figure S1** Schematic strategy for the construction of promoter replacement and GFP tagging strains. The promoter replacement strains were constructed in haploid H99 strain background and the 3xGFP tagging strain was constructed in the diploid AI187 strain background. (A, C, E, H, K, N and P) Schematic strategy for the construction of promoter replacement strains. (B, D, F, I, L, O and Q) The correct genotypes of the strains were confirmed by Southern blot analysis. (G, J and M) Northern blot analysis for measuring *TOR1*, *TLK1* and *HSF1* expression in  $P_{H3}::TOR1$ ,  $P_{H3}::TLK1$  and  $P_{H3}::HSF1$  strains. Ethidium bromide staining result of rRNA is used for loading control.

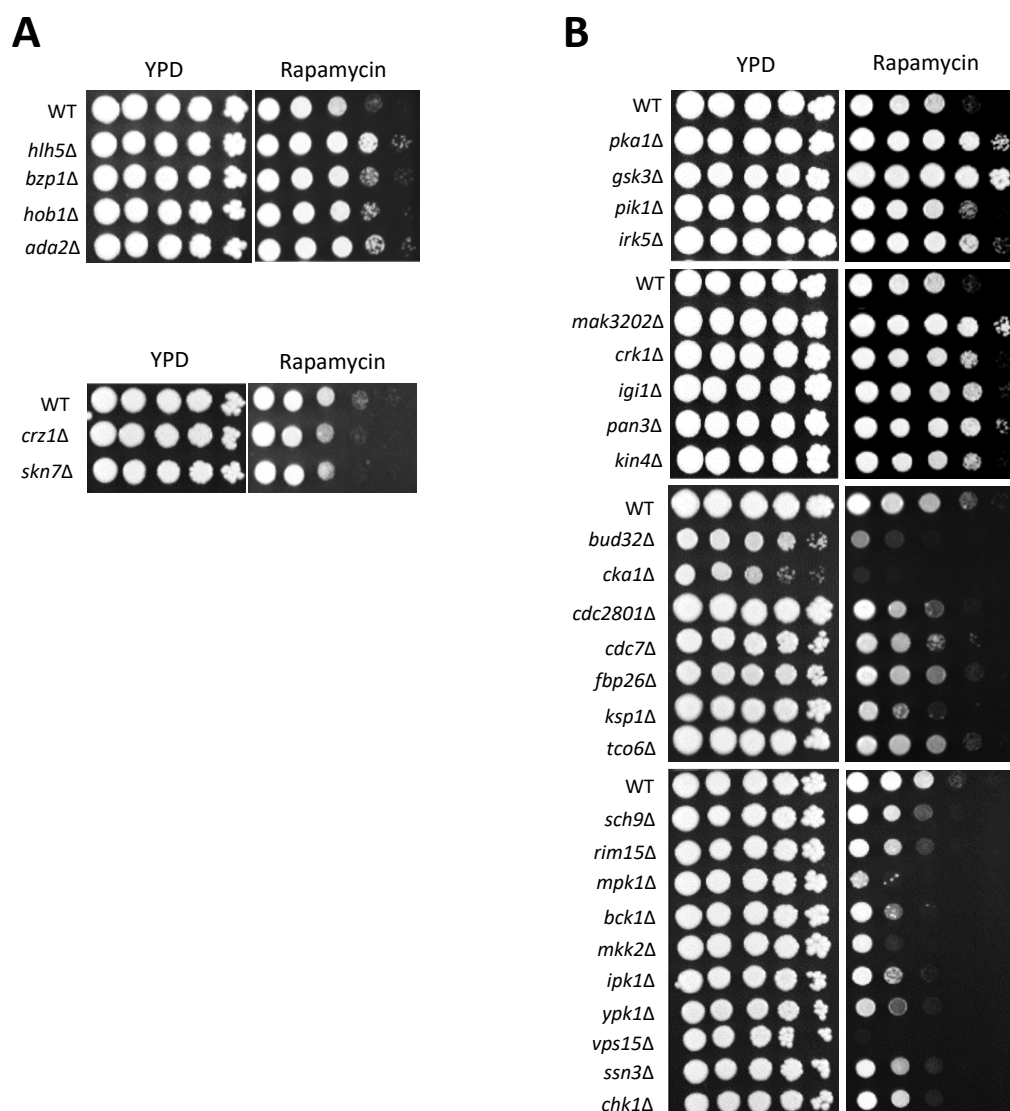

**Figure S2** Screening of transcription factor and kinase mutants showing altered rapamycin-susceptibility. (A to B) *C. neoformans* strains were grown overnight at 30°C in liquid YPD medium. The 10-fold serially diluted cells (1 to 10<sup>4</sup> dilutions) were spotted on YPD plates containing the rapamycin (10 ng/ml) and the plates were incubated at 30°C and photographed daily for 5 days. [Strains: WT H99, *hlh5Δ* (YSB2609), *bzp1Δ* (YSB723), *hob1Δ* (YSB2308), *ada2Δ* (YSB2381), *crz1Δ* (YSB1263), *skn7Δ* (YSB349), *pka1Δ* (YSB188), *gsk3Δ* (YSB2038), *pik1Δ* (YSB1493), *irk5Δ* (YSB2952), *mak3202Δ* (YSB3240), *crk1Δ* (YSB1709), *igi1Δ* (YSB1514), *pan3Δ* (YSB2809), *kin4Δ* (YSB2955), *bud32Δ* (YSB1968), *cka1Δ* (YSB3051), *cdc2801Δ* (YSB2370), *cdc7Δ* (YS2199), *fbp26Δ* (YSB4341), *ksp1Δ* (YSB1808), *tco6Δ* (YSB2469), *sch9Δ* (YSB619), *rim15Δ* (YSB1216), *mpk1Δ* (YSB3814), *bck1Δ* (YSB273), *mkk2Δ* (YSB330), *ipk1Δ* (YSB2157), *ypk1Δ* (YSB1885), *vps15Δ* (YSB1500), *ssn3Δ* (YSB3038), *chk1Δ* (YSB1825)]. This spot assay was repeated more than three times and one representative image was shown here.

Table S1. Strains used in this study

| Strain                      | Genotype                                                                                         | Parent  | Reference                    |
|-----------------------------|--------------------------------------------------------------------------------------------------|---------|------------------------------|
| <b><i>C. neoformans</i></b> |                                                                                                  |         |                              |
| H99                         | <i>MAT</i> $\alpha$ (Serotype A)                                                                 |         | (PERFECT <i>et al.</i> 1993) |
| AI187                       | Diploid <i>ade2/ADE2 ura5/URA5 MAT</i> $\alpha$ / <i>MAT</i> $\alpha$                            |         | (IDNURM 2010)                |
| YSB3450                     | Diploid <i>ade2/ADE2 ura5/URA5 MAT</i> $\alpha$ / <i>MAT</i> $\alpha$ <i>TOR1/tor1</i> $\Delta$  | AI187   | This study                   |
| YSB3176                     | <i>MAT</i> $\alpha$ <i>P</i> <sub>CTR4</sub> : <i>TOR1::NAT</i>                                  | H99     | This study                   |
| YSB3178                     | <i>MAT</i> $\alpha$ <i>P</i> <sub>CTR4</sub> : <i>TOR1::NAT</i>                                  | H99     | This study                   |
| YSB3180                     | <i>MAT</i> $\alpha$ <i>P</i> <sub>CTR4</sub> : <i>TOR1::NAT</i>                                  | H99     | This study                   |
| YSB3043                     | <i>MAT</i> $\alpha$ <i>P</i> <sub>CTR4</sub> : <i>TLK1::NAT</i>                                  | H99     | This study                   |
| YSB3044                     | <i>MAT</i> $\alpha$ <i>P</i> <sub>CTR4</sub> : <i>TLK1::NAT</i>                                  | H99     | This study                   |
| YSB3045                     | <i>MAT</i> $\alpha$ <i>P</i> <sub>CTR4</sub> : <i>TLK1::NAT</i>                                  | H99     | This study                   |
| YSB3144                     | <i>MAT</i> $\alpha$ <i>P</i> <sub>H3</sub> : <i>TOR1::NEO</i>                                    | H99     | This study                   |
| YSB3147                     | <i>MAT</i> $\alpha$ <i>P</i> <sub>H3</sub> : <i>TOR1::NEO</i>                                    | H99     | This study                   |
| YSB3115                     | <i>MAT</i> $\alpha$ <i>P</i> <sub>H3</sub> : <i>TLK1::NEO</i>                                    | H99     | This study                   |
| YSB3118                     | <i>MAT</i> $\alpha$ <i>P</i> <sub>H3</sub> : <i>TLK1::NEO</i>                                    | H99     | This study                   |
| YSB3153                     | <i>MAT</i> $\alpha$ <i>tlk1</i> $\Delta$ :: <i>NAT</i> STM#116                                   | H99     | This study                   |
| YSB3188                     | <i>MAT</i> $\alpha$ <i>tlk1</i> $\Delta$ :: <i>NAT</i> STM#116                                   | H99     | This study                   |
| YSB619                      | <i>MAT</i> $\alpha$ <i>sch9</i> $\Delta$ :: <i>NAT</i> -STM#169                                  | H99     | (LEE <i>et al.</i> 2016)     |
| YSB620                      | <i>MAT</i> $\alpha$ <i>sch9</i> $\Delta$ :: <i>NAT</i> -STM#169                                  | H99     | (LEE <i>et al.</i> 2016)     |
| YSB2200                     | <i>MAT</i> $\alpha$ <i>P</i> <sub>H3</sub> : <i>HSF1::NEO</i>                                    | H99     | (YANG <i>et al.</i> 2017)    |
| YSB3394                     | <i>MAT</i> $\alpha$ <i>P</i> <sub>H3</sub> : <i>TOR1::NEO sch9</i> $\Delta$                      | YSB3144 | This study                   |
| YSB3342                     | <i>MAT</i> $\alpha$ <i>P</i> <sub>H3</sub> : <i>TOR1::NEO P</i> <sub>H3</sub> : <i>HSF1::NAT</i> | YSB3144 | This study                   |
| YSB3785                     | <i>MAT</i> $\alpha$ CNAG_05216 $\Delta$ :: <i>NAT</i> -STM#184                                   | H99     | This study                   |
| YSB4869                     | <i>TOR1/TOR1-loxP-NEO'-loxP-3xGFP</i>                                                            | YSB4868 | This study                   |
| YSB4870                     | <i>TOR1/TOR1-3xGFP</i>                                                                           | YSB4868 | This study                   |
| YSB64                       | <i>MAT</i> $\alpha$ <i>hog1</i> $\Delta$ :: <i>NAT</i> -STM#177                                  | H99     | (BAHN <i>et al.</i> 2005)    |
| YSB676                      | <i>MAT</i> $\alpha$ <i>atf1</i> $\Delta$ :: <i>NAT</i> -STM #220 (CNAG_04090)                    | H99     | (LEE <i>et al.</i> 2016)     |
| YSB678                      | <i>MAT</i> $\alpha$ <i>atf1</i> $\Delta$ :: <i>NAT</i> -STM #220 (CNAG_04090)                    | H99     | (LEE <i>et al.</i> 2016)     |
| YSB2609                     | <i>MAT</i> $\alpha$ CNAG_02516 $\Delta$ :: <i>NAT</i> STM#210                                    | H99     | (LEE <i>et al.</i> 2016)     |
| YSB3059                     | <i>MAT</i> $\alpha$ CNAG_02516 $\Delta$ :: <i>NAT</i> STM#210                                    | H99     | (LEE <i>et al.</i> 2016)     |
| YSB1263                     | <i>MAT</i> $\alpha$ <i>crz1</i> $\Delta$ :: <i>NAT</i> -STM#231 (CNAG_00156)                     | H99     | (LEE <i>et al.</i> 2016)     |
| YSB1264                     | <i>MAT</i> $\alpha$ <i>crz1</i> $\Delta$ :: <i>NAT</i> -STM#231 (CNAG_00156)                     | H99     | (LEE <i>et al.</i> 2016)     |
| YSB349                      | <i>MAT</i> $\alpha$ <i>skn7</i> $\Delta$ :: <i>NAT</i> -STM#201                                  | H99     | (LEE <i>et al.</i> 2016)     |
| YSB350                      | <i>MAT</i> $\alpha$ <i>skn7</i> $\Delta$ :: <i>NAT</i> -STM#201                                  | H99     | (LEE <i>et al.</i> 2016)     |
| YSB723                      | <i>MAT</i> $\alpha$ <i>Cnhac1</i> (CNAG_06134):: <i>NAT</i> -STM #295                            | H99     | (LEE <i>et al.</i> 2016)     |
| YSB724                      | <i>MAT</i> $\alpha$ <i>Cnhac1</i> (CNAG_06134):: <i>NAT</i> -STM#295                             | H99     | (LEE <i>et al.</i> 2016)     |
| YSB2308                     | <i>MAT</i> $\alpha$ CNAG_01431 $\Delta$ :: <i>NAT</i> -STM#213                                   | H99     | (LEE <i>et al.</i> 2016)     |
| YSB2309                     | <i>MAT</i> $\alpha$ CNAG_01431 $\Delta$ :: <i>NAT</i> -STM#213                                   | H99     | (LEE <i>et al.</i> 2016)     |
| YSB2381                     | <i>MAT</i> $\alpha$ CNAG_01626 $\Delta$ :: <i>NAT</i> -STM#232                                   | H99     | (LEE <i>et al.</i> 2016)     |
| YSB2382                     | <i>MAT</i> $\alpha$ CNAG_01626 $\Delta$ :: <i>NAT</i> -STM#232                                   | H99     | (LEE <i>et al.</i> 2016)     |
| YSB1968                     | <i>MAT</i> $\alpha$ CNAG_02712 $\Delta$ :: <i>NAT</i> -STM#296                                   | H99     | (LEE <i>et al.</i> 2016)     |
| YSB1969                     | <i>MAT</i> $\alpha$ CNAG_02712 $\Delta$ :: <i>NAT</i> -STM#296                                   | H99     | (LEE <i>et al.</i> 2016)     |
| YSB1216                     | <i>MAT</i> $\alpha$ CNAG_03024 $\Delta$ :: <i>NAT</i> -STM #191                                  | H99     | (LEE <i>et al.</i> 2016)     |
| YSB1217                     | <i>MAT</i> $\alpha$ CNAG_03024 $\Delta$ :: <i>NAT</i> -STM #191                                  | H99     | (LEE <i>et al.</i> 2016)     |
| YSB1709                     | <i>MAT</i> $\alpha$ CNAG_06193 $\Delta$ :: <i>NAT</i> STM#43                                     | H99     | (LEE <i>et al.</i> 2016)     |
| YSB1710                     | <i>MAT</i> $\alpha$ CNAG_06193 $\Delta$ :: <i>NAT</i> STM#43                                     | H99     | (LEE <i>et al.</i> 2016)     |
| YSB2809                     | <i>MAT</i> $\alpha$ CNAG_04821:: <i>NAT</i> STM#204                                              | H99     | (LEE <i>et al.</i> 2016)     |
| YSB2810                     | <i>MAT</i> $\alpha$ CNAG_04821:: <i>NAT</i> STM#204                                              | H99     | (LEE <i>et al.</i> 2016)     |
| YSB2952                     | <i>MAT</i> $\alpha$ CNAG_03811:: <i>NAT</i> STM#213                                              | H99     | (LEE <i>et al.</i> 2016)     |

|         |                                            |     |                           |
|---------|--------------------------------------------|-----|---------------------------|
| YSB2953 | <i>MATα</i> CNAG_03811::NAT STM#213        | H99 | (LEE <i>et al.</i> 2016)  |
| YSB3038 | <i>MATα</i> CNAG_06086::NAT STM#219        | H99 | (LEE <i>et al.</i> 2016)  |
| YSB3039 | <i>MATα</i> CNAG_06086::NAT STM#219        | H99 | (LEE <i>et al.</i> 2016)  |
| YSB3240 | <i>MATα</i> CNAG_06033::NAT STM#169        | H99 | (LEE <i>et al.</i> 2016)  |
| YSB3241 | <i>MATα</i> CNAG_06033::NAT STM#169        | H99 | (LEE <i>et al.</i> 2016)  |
| YSB2157 | <i>MATα</i> CNAG_01294Δ::NAT STM#184       | H99 | (LEE <i>et al.</i> 2016)  |
| YSB2158 | <i>MATα</i> CNAG_01294Δ::NAT STM#184       | H99 | (LEE <i>et al.</i> 2016)  |
| YSB278  | <i>MATα tco1::NAT</i> STM#102              | H99 | (BAHN <i>et al.</i> 2006) |
| YSB279  | <i>MATα tco1::NAT</i> STM#102              | H99 | (BAHN <i>et al.</i> 2006) |
| YSB3051 | <i>MATα</i> CNAG_05694Δ::NAT STM#6         | H99 | (LEE <i>et al.</i> 2016)  |
| YSB3053 | <i>MATα</i> CNAG_05694Δ::NAT STM#6         | H99 | (LEE <i>et al.</i> 2016)  |
| YSB1885 | <i>MATα</i> CNAG_02389Δ::NAT STM#242       | H99 | (LEE <i>et al.</i> 2016)  |
| YSB1886 | <i>MATα</i> CNAG_02389Δ::NAT STM#242       | H99 | (LEE <i>et al.</i> 2016)  |
| YSB1808 | <i>MATα</i> CNAG_01905Δ::NAT STM#159       | H99 | (LEE <i>et al.</i> 2016)  |
| YSB1809 | <i>MATα</i> CNAG_01905Δ::NAT STM#159       | H99 | (LEE <i>et al.</i> 2016)  |
| YSB1825 | <i>MATα</i> CNAG_03167Δ::NAT STM#205       | H99 | (LEE <i>et al.</i> 2016)  |
| YSB1828 | <i>MATα</i> CNAG_03167Δ::NAT STM#205       | H99 | (LEE <i>et al.</i> 2016)  |
| YSB1514 | <i>MATα</i> CNAG_05600Δ::NAT STM#230       | H99 | (LEE <i>et al.</i> 2016)  |
| YSB1515 | <i>MATα</i> CNAG_05600Δ::NAT STM#230       | H99 | (LEE <i>et al.</i> 2016)  |
| YSB1500 | <i>MATα</i> CNAG_02680::NAT-STM #123       | H99 | (LEE <i>et al.</i> 2016)  |
| YSB1501 | <i>MATα</i> CNAG_02680::NAT-STM #123       | H99 | (LEE <i>et al.</i> 2016)  |
| YSB3814 | <i>MATα</i> CNAG_04514::NAT#240            | H99 | (LEE <i>et al.</i> 2016)  |
| YSB3816 | <i>MATα</i> CNAG_04514::NAT#240            | H99 | (LEE <i>et al.</i> 2016)  |
| YSB264  | <i>MATα ssk2::NATSTM#210</i>               | H99 | (BAHN <i>et al.</i> 2006) |
| YSB265  | <i>MATα ssk2::NATSTM#210</i>               | H99 | (BAHN <i>et al.</i> 2006) |
| YSB330  | <i>MATα mkk1::NATSTM#224</i>               | H99 | (LEE <i>et al.</i> 2016)  |
| YSB331  | <i>MATα mkk1::NATSTM#224</i>               | H99 | (LEE <i>et al.</i> 2016)  |
| YSB273  | <i>MATα mkh1(bck1)::NATSTM#43</i>          | H99 | (LEE <i>et al.</i> 2016)  |
| YSB274  | <i>MATα mkh1(bck1)::NATSTM#43</i>          | H99 | (LEE <i>et al.</i> 2016)  |
| YSB188  | <i>MATα pka1::NATSTM#191</i>               | H99 | (BAHN <i>et al.</i> 2004) |
| YSB189  | <i>MATα pka1::NATSTM#191</i>               | H99 | (BAHN <i>et al.</i> 2004) |
| YSB2038 | <i>MATα</i> CNAG_06730Δ::NAT STM#123       | H99 | (LEE <i>et al.</i> 2016)  |
| YSB2039 | <i>MATα</i> CNAG_06730Δ::NAT STM#123       | H99 | (LEE <i>et al.</i> 2016)  |
| YSB2469 | <i>MATα</i> CNAG_00363Δ::NAT STM#58 (TCO6) | H99 | (LEE <i>et al.</i> 2016)  |
| YSB2554 | <i>MATα</i> CNAG_00363Δ::NAT STM#58 (TCO6) | H99 | (LEE <i>et al.</i> 2016)  |
| YSB2370 | <i>MATα</i> CNAG_00415Δ::NAT STM#191       | H99 | (LEE <i>et al.</i> 2016)  |
| YSB3699 | <i>MATα</i> CNAG_00415Δ::NAT STM#191       | H99 | (LEE <i>et al.</i> 2016)  |
| YSB123  | <i>MATα pbs2Δ::NATSTM#213</i>              | H99 | (LEE <i>et al.</i> 2016)  |
| YSB124  | <i>MATα pbs2Δ::NATSTM#213</i>              | H99 | (LEE <i>et al.</i> 2016)  |
| YSB1493 | <i>MATα</i> CNAG_07744Δ::NAT STM#227       | H99 | (LEE <i>et al.</i> 2016)  |
| YSB1494 | <i>MATα</i> CNAG_07744Δ::NAT STM#227       | H99 | (LEE <i>et al.</i> 2016)  |
| YSB261  | <i>MATα ssk1Δ::NATSTM#205</i>              | H99 | (BAHN <i>et al.</i> 2006) |

Table S2. Primers used in this study

| Primer name | Sequence                                  | Comments                                                         |
|-------------|-------------------------------------------|------------------------------------------------------------------|
| B79         | TGTGGATGCTGGCGGAGGATA                     | Screening primer on <i>ACT1</i> promoter                         |
| B1026       | GTAAACGACGGCCAGTGAGC                      | M13 forward (extended)                                           |
| B1027       | CAGGAAACAGCTATGACCATG                     | M13 reverse (extended)                                           |
| B1454       | AAGGTGTTCCCGACGACGAATCG                   | NSL2                                                             |
| B1455       | AACTCCGTCGCGAGCCCCATCAAC                  | NSR2                                                             |
| B1886       | TGGAAGAGATGGATGTGC                        | NSL-NEO                                                          |
| B1887       | ATTGTCTGTTGTGCCAG                         | NSL-NEO                                                          |
| B354        | GCATGCAGGATTCGAGTG                        | <i>CTR4</i> promoter- left flanking primer 1                     |
| B355        | GATTGGTGAAGTCGTTGTCCG                     | <i>CTR4</i> promoter- right flanking primer 2                    |
| B4017       | GCATGCAGGATTCGAGTG                        | <i>H3</i> promoter- left flanking primer 1                       |
| B4018       | GTGATAGATGTGTTGTGGTG                      | <i>H3</i> promoter- right flanking primer 2                      |
| B6081       | TACACTGAAGTCGGAGCCTG                      | <i>TOR1</i> 5'-flanking region primer L1                         |
| B6084       | CACTCGAATCCTGCATGCGGCGATGATTAGGGGGCCAT    | <i>TOR1</i> 5'-flanking region primer L2 ( <i>CTR4</i> promoter) |
| B6085       | CGACAACGACTTCACCAATCATGTCTTCACAATCAGACGT  | <i>TOR1</i> 3'-flanking region primer R1 ( <i>CTR4</i> promoter) |
| B6092       | GAAGGTAGTTTCGCAAAATGG                     | <i>TOR1</i> 3'-flanking region primer R2                         |
| B4090       | ATCGCTTCTCGTTTGACC                        | <i>TLK1</i> 5'-flanking region primer L1 ( <i>CTR4</i> promoter) |
| B6004       | CACTCGAATCCTGCATGCTTCGGGGATATTGCTGGCCTC   | <i>TLK1</i> 5'-flanking region primer L2 ( <i>CTR4</i> promoter) |
| B6005       | CGACAACGACTTCACCAATCATGACTGTCACTTCTAGAGTA | <i>TLK1</i> 3'-flanking region primer R1 ( <i>CTR4</i> promoter) |
| B6006       | GACGCATACTGTTTATTGTG                      | <i>TLK1</i> 3'-flanking region primer R2 ( <i>CTR4</i> promoter) |
| B6003       | TCGCAAGAGGATGTGAATC                       | <i>TLK1</i> promoter replacement screening primer                |
| B6082       | CACTCGAATCCTGCATGCGGCGATGATTAGGGGGCCA     | <i>TOR1</i> 5'-flanking region primer L2 ( <i>CTR4</i> promoter) |
| B6083       | ACCACAACACATCTATCACATGTCTTCACAATCAGACGT   | <i>TOR1</i> 3'-flanking region primer R1 ( <i>CTR4</i> promoter) |
| B6120       | AACGAGGGATTTGGCTTC                        | <i>TOR1</i> promoter replacement screening primer                |
| B6079       | CACTCGAATCCTGCATGCCTGGGACATATCATGAGTTGT   | <i>TOR1</i> 5'-flanking region primer L2 ( <i>H3</i> promoter)   |
| B6080       | ACCACAACACATCTATCACATGGTCGTTGATGAAACGAT   | <i>TOR1</i> 3'-flanking region primer R1 ( <i>H3</i> promoter)   |
| B4088       | CTTTGAAACCGACCATAGG                       | <i>TLK1</i> Diagnostic screening primer SO                       |
| B4089       | GGACCGAGACACTACTACAAC                     | <i>TLK1</i> Southern blot probe primer PO                        |
| B4090       | ATCGCTTCTCGTTTGACC                        | <i>TLK1</i> 5'-flanking region primer L1                         |
| B4091       | TCACTGGCCGTCGTTTTACATCAACGACCATCTGGGAC    | <i>TLK1</i> 5'-flanking region primer L2                         |
| B4092       | CATGGTCATAGCTGTTTCTGTGGCTACTGCTGTGTATTGC  | <i>TLK1</i> 3'-flanking region primer R1                         |
| B4093       | GCGGTAAAGGTGGAAAGTC                       | <i>TLK1</i> 3'-flanking region primer R2                         |
| B6182       | CACGAAAGATACAACGCC                        | <i>TLK1</i> Northern blot probe primer NP1                       |
| B6183       | TGTTTTCCAGGTGGCAAG                        | <i>TLK1</i> Northern blot probe primer NP2                       |
| B6184       | CCTTCCTCAGGTATGTGAATC                     | <i>TOR1</i> Northern blot probe primer NP1                       |
| B6185       | AGCAAATGGGAACAGTCC                        | <i>TOR1</i> Northern blot probe primer NP2                       |
| B6937       | ATCGATGGTGGCGGTGGCTCTGTG                  | 1 <sup>ST</sup> <i>GFP</i> F                                     |
| B6938       | AGATCTCTGTACAGCTCGTCCAT                   | 1 <sup>ST</sup> <i>GFP</i> R                                     |
| B6939       | AGATCTGTGAGCAAGGGCGAGGAG                  | 2 <sup>ND</sup> <i>GFP</i> F                                     |
| B6940       | CTGCAGCTGTACAGCTCGTCCAT                   | 2 <sup>ND</sup> <i>GFP</i> R                                     |
| B6941       | CTGCAGGTGAGCAAGGGCGAGGAG                  | 3 <sup>RD</sup> <i>GFP</i> F                                     |
| B6942       | CTCGAGAGAGCCACCGCCACCTTGACAGCTCGTCCAT     | 3 <sup>RD</sup> <i>GFP</i> R                                     |
| B6943       | CTCGAGGAGTCTATCTGGGTTCTC                  | <i>TOR1</i> E5-2 F                                               |
| B6944       | TCTAGATCGTCTGCTGACAGATTG                  | <i>TOR1</i> E5-2 R                                               |
| B6945       | ACTAGTTCGACAACCTTAATAT                    | <i>loxP</i> NAT F                                                |
| B6946       | ATCGATACTACCTAATAACTTCGTA                 | <i>loxP</i> NAT R                                                |
| B6947       | GAGCTCACAGCCACAGCCACTTCC                  | <i>TOR1</i> E5-1 F                                               |
| B6948       | ACTAGTTGTCGAGCTGGCTTTGAG                  | <i>TOR1</i> E5-1 R                                               |
| B6407       | TCATAGAGGCGTAGAACCTTC                     | <i>TOR1</i> seq1                                                 |

|          |                                                  |                                                                                                                                                                                                  |
|----------|--------------------------------------------------|--------------------------------------------------------------------------------------------------------------------------------------------------------------------------------------------------|
| B6493    | ATGGCGATGATTTAGGGG                               | <i>TOR1</i> seq2                                                                                                                                                                                 |
| B6506    | AACAATACCATCCTTCCCAC                             | <i>TOR1</i> seq3                                                                                                                                                                                 |
| B6507    | GAAAGACCTGTGCCATAC                               | <i>TOR1</i> seq4                                                                                                                                                                                 |
| B6759    | GGGTATTCTTGGGTGTAAGC                             | <i>TOR1</i> seq5                                                                                                                                                                                 |
| B8577    | GCTCTTATCTACCTGCCTTG                             | <i>TOR1-3xGFP</i> Probe primer1                                                                                                                                                                  |
| B8578    | CGCAAGGAGACGAAGAGC                               | <i>TOR1 3xGFP</i> Probe primer2                                                                                                                                                                  |
| B7761    | AGCTGCATATCCGCAACT                               | <i>TOR1</i> qRT1                                                                                                                                                                                 |
| B7762    | CTCAACGAGGGAGATGATGG                             | <i>TOR1</i> qRT2                                                                                                                                                                                 |
| B7048    | GCG GCC GCA CAG ATT TAC CTA CTT CC               | <i>SCH9</i> 5'-flanking region primer L1                                                                                                                                                         |
| B7049    | GCG GCC GCG TCC ATA TCG ACG TCG CA               | <i>SCH9</i> 5'-flanking region primer L2                                                                                                                                                         |
| B1504    | CATGGTCATAGCTGTTTCTCTGAATGAGAATGCGGTGGAC         | <i>SCH9</i> 3'-flanking region primer R1                                                                                                                                                         |
| B1505    | GGATGGATGGATGCTCAT                               | <i>SCH9</i> 3'-flanking region primer R2                                                                                                                                                         |
| B1502    | TTCTTCGTGCTGAGAGGAG                              | <i>SCH9</i> Diagnostic screening primer SO1                                                                                                                                                      |
| B1704    | AACCGAAACCCTCAGAACC                              | <i>SCH9</i> Southern blot probe primer PO                                                                                                                                                        |
| B7755    | TCATTTTTTTGTGCCGAATGC                            | <i>HSF1</i> qRT1                                                                                                                                                                                 |
| B7756    | ACATGTTGAGTTGACGGACA                             | <i>HSF1</i> qRT2                                                                                                                                                                                 |
| B7757    | TAAGAAGCACTCCGAGTTCA                             | <i>HSP90</i> qRT1                                                                                                                                                                                |
| B7758    | ACCCTCCTTGACCTCCTCT                              | <i>HSP90</i> qRT2                                                                                                                                                                                |
| B7759    | ACCTGATTATGGCCGGGAAA                             | <i>HSP104</i> qRT1                                                                                                                                                                               |
| B7760    | GTGGCACCAATGACCTTGAG                             | <i>HSP104</i> qRT2                                                                                                                                                                               |
| B8341    | GCATACACTCACTTGACTACTC                           | <i>ERG11</i> qRT1                                                                                                                                                                                |
| B8342    | GACCGGACTTGATAAACTTC                             | <i>ERG11</i> qRT2                                                                                                                                                                                |
| B9564    | TGGTGGTGAGGGAAAATG                               | <i>RAD51</i> qRT1                                                                                                                                                                                |
| B9565    | GCACCTCTTCACCATCAAG                              | <i>RAD51</i> qRT2                                                                                                                                                                                |
| B9566    | GCAAAATCTTTCAGCGTGTG                             | <i>RAD54</i> qRT1                                                                                                                                                                                |
| B9567    | CACAAAGTTTCGGGGTTG                               | <i>RAD54</i> qRT2                                                                                                                                                                                |
| B9568    | AAAGCGATGAGGATGACC                               | <i>RDH54</i> qRT1                                                                                                                                                                                |
| B9569    | CTCGTCTTTTTTCAGCACG                              | <i>RDH54</i> qRT2                                                                                                                                                                                |
| B9570    | TAACACTCAGCGCCATCC                               | <i>RIG1</i> qRT1                                                                                                                                                                                 |
| B9571    | CACATCGGCGTTCATCTCG                              | <i>RIG1</i> qRT2                                                                                                                                                                                 |
| B9572    | ATTCGGGTGTAAAGCCTG                               | <i>RIG2</i> qRT1                                                                                                                                                                                 |
| B9573    | AGAGGCTGGAATAGACGAGG                             | <i>RIG2</i> qRT2                                                                                                                                                                                 |
| B9574    | ATATCAACCGCCGATCAGCAC                            | <i>BDR1</i> qRT1                                                                                                                                                                                 |
| B9575    | TCCCTAATTCGTTGTTACGCAC                           | <i>BDR1</i> qRT2                                                                                                                                                                                 |
| ALID2261 | gtaacgccagggttttcccagtcacgacgAATTCCACAGCCCGACATT | <i>TOR1</i> KO 5' Flanking region primer L1                                                                                                                                                      |
| ALID2262 | GCTTATGTGAGTCTCCCGACTCTGTGAGCTGGCTTT             | <i>TOR1</i> KO 5' Flanking region primer L1 (NAT)                                                                                                                                                |
| ALID2263 | CTCGTTTCTACATCTCTTCGCGAAGTTGTGAAGTGTC            | <i>TOR1</i> KO 3' Flanking region primer R1 (NAT)                                                                                                                                                |
| ALID2264 | GcggataacaatttcacacaggaacagcAACAGGTCACAATGCAGCCT | <i>TOR1</i> KO 3' Flanking region primer R1                                                                                                                                                      |
| ALID2265 | GCAATACCTCTATTACCTGC                             | <i>TOR1</i> KO diagnostic screening F                                                                                                                                                            |
| ALID2266 | GGTTGCAAACGCAGATAGC                              | <i>TOR1</i> KO diagnostic screening R                                                                                                                                                            |
| ai006    | GAAGAGATGTAGAAACGAG                              | pACT1 F                                                                                                                                                                                          |
| ai290    | GGGAGGACTCACATAAGC                               | pTRP1 R                                                                                                                                                                                          |
| ai37     | ATGGCGGCCGCCACTCTTGAC                            | NAT F                                                                                                                                                                                            |
| ai270    | ACTTCTCGCAAAGTGAATCC                             | NAT R                                                                                                                                                                                            |
| ALID1229 | gtaacgccagggttttcccagtcacgacg                    | F- Primer on pRS426 backbone for amplification of the constructs for targeted gene replacement<br>R- Primer on pRS426 backbone for amplification of the constructs for targeted gene replacement |
| ALID1230 | gcggataacaatttcacacaggaacagc                     |                                                                                                                                                                                                  |
| ai144    | GAAAAGGTTACGACAGAGG                              | PCR check MAT in serotype A strains                                                                                                                                                              |
| ai145    | TGGGAAGAACTATCAGAGG                              | PCR check MAT in serotype A strains                                                                                                                                                              |
| ai151    | CGCACCTTTTCTGTAGGG                               | PCR check MAT in serotype A strains                                                                                                                                                              |
| ai152    | CAACAAATTCACGTACAGCC                             | PCR check MAT in serotype A strains                                                                                                                                                              |
| ALID0375 | tgcaagagcggaagtgc                                | <i>URA5</i> F (Promoter)                                                                                                                                                                         |

---

|          |                                                  |                                                            |
|----------|--------------------------------------------------|------------------------------------------------------------|
| ALID0376 | gattgacagccaacaatc                               | <i>URA5</i> R (terminator)                                 |
| ALID0380 | ACTGGATCGACCTCATCG                               | <i>ADE2</i> F                                              |
| ALID0381 | CGATGACTGGCAAACCTGG                              | <i>ADE2</i> R                                              |
| ALID2262 | GCTTATGTGAGTCCTCCCGACTCTGTCGAGCTGGCTTT           | <i>TOR1</i> KO 5' Flanking region primer L1 ( <i>NAT</i> ) |
| ALID2263 | CTCGTTTCTACATCTCTTCGCGAAGTTGTGAAGTGTC            | <i>TOR1</i> KO 3' Flanking region primer R1 ( <i>NAT</i> ) |
| ALID2264 | GcggataacaatttcacacaggaacagcAACAGGTCACAATGCAGCCT | <i>TOR1</i> KO 3' Flanking region primer R1                |

---



## References

- Bahn, Y. S., J. K. Hicks, S. S. Giles, G. M. Cox and J. Heitman, 2004 Adenylyl cyclase-associated protein Aca1 regulates virulence and differentiation of *Cryptococcus neoformans* via the cyclic AMP-protein kinase A cascade. *Eukaryot. Cell* 3: 1476-1491.
- Bahn, Y. S., K. Kojima, G. M. Cox and J. Heitman, 2005 Specialization of the HOG pathway and its impact on differentiation and virulence of *Cryptococcus neoformans*. *Mol. Biol. Cell* 16: 2285-2300.
- Bahn, Y. S., K. Kojima, G. M. Cox and J. Heitman, 2006 A unique fungal two-component system regulates stress responses, drug sensitivity, sexual development, and virulence of *Cryptococcus neoformans*. *Mol. Biol. Cell* 17: 3122-3135.
- Idnurm, A., 2010 A tetrad analysis of the basidiomycete fungus *Cryptococcus neoformans*. *Genetics* 185: 153–163.
- Lee, K. T., Y. S. So, D. H. Yang, K. W. Jung, J. Choi *et al.*, 2016 Systematic fungal analysis of kinases in the fungal pathogen *Cryptococcus neoformans*. *Nat. Commun.* 7: 12766.
- Perfect, J. R., N. Ketabchi, G. M. Cox, C. W. Ingram and C. L. Beiser, 1993 Karyotyping of *Cryptococcus neoformans* as an epidemiological tool. *J. Clin. Microbiol.* 31: 3305-3309.
- Yang, D. H., K. W. Jung, S. Bang, J. W. Lee, M. H. Song *et al.*, 2017 Rewiring of signaling networks modulating thermotolerance in the human pathogen *Cryptococcus neoformans*. *Genetics* 205: 201-219.
