# Supplementary material
Source: publisher figshare collection journal article supplement (https://gsajournals.figshare.com/articles/dataset/_/8208569)
Supplement: Supplementary file 1 [file 1]

## Sheet: CnTOR1oe RNA-seq
Table S4. The RNA-seq data generated in this study. The falase discovery rate (FDR) was controlled by adjusting the P value using the Benjamini-Hochberg algorithm. Normalized FPKM values are already log-transformed.
		Normalized FPKM									Wild-type vs. Rapamycin-treated WT		Wild-type vs. TOR1oe
Gene_ID	Description	WT_1	WT_2	WT_3	Rapamycin_1	Rapamycin_2	Rapamycin_3	TOR1oe_1	TOR1oe_2	TOR1oe_3	Fold change (Rapamycin/WT)	FDR (P value)	Fold change (TOR1oe/WT)	FDR (P value)
CNAG_02701	hypothetical protein (2335 nt)	5.36573	5.49321	4.88555	2.49173	2.6498	2.41524	8.49907	8.6056	8.35357	-6.63106	0.0109307	9.43431	0.0470299
CNAG_02691	hypothetical protein (1869 nt)	5.23657	5.44228	4.65868	2.59365	2.87756	2.53585	7.47185	7.40999	7.32172	-5.43956	0.0146813	4.88608	0.0794902
CNAG_07362	nucleolin (1903 nt)	8.43191	8.49622	8.62386	6.16835	6.26974	6.07121	8.11583	8.18143	8.0331	-5.08964	0.0035408	-1.32612	0.0710714
CNAG_04777	S-adenosylmethionine-dependent methyltransferase (1671 nt)	5.5307	5.75129	5.76757	3.35195	3.68574	3.24974	5.4457	5.35622	5.3751	-4.77018	0.00629886	-1.22336	0.160953
CNAG_07413	nucleolar GTP-binding protein 2 (3106 nt)	6.78274	6.81672	6.73779	4.5046	4.67706	4.5997	6.86459	6.98642	6.68031	-4.54821	0.00448812	1.04586	0.678036
CNAG_03724	ribosomal RNA methyltransferase Nop2 (2561 nt)	7.36025	7.47616	7.44405	5.29195	5.33243	5.1156	7.11821	7.31313	7.25387	-4.53204	0.00450525	-1.14744	0.167008
CNAG_03624	pescadillo (2184 nt)	7.17186	7.33208	7.30507	5.14873	5.32825	4.84136	6.87754	6.94472	6.78018	-4.48017	0.0110771	-1.32151	0.0666994
CNAG_06916	hypothetical protein (3866 nt)	4.27448	4.38887	4.14659	2.08643	2.22819	2.01947	3.57476	3.59576	3.43561	-4.46487	0.00422177	-1.66394	0.0519436
CNAG_04072	60S ribosome subunit biogenesis protein nip7 (1294 nt)	7.57392	7.5296	7.55531	5.45107	5.68148	5.18961	7.19943	7.26868	7.36432	-4.32358	0.0167505	-1.21039	0.113188
CNAG_05228	U3 small nucleolar ribonucleoprotein LCP5 (1771 nt)	6.57712	6.76158	6.86342	4.59402	4.85264	4.44176	6.56168	6.70925	6.65618	-4.30068	0.00573553	-1.0656	0.553364
CNAG_06468	nucleolar GTP-binding protein (2644 nt)	6.84925	7.1684	6.95999	5.05605	4.91091	4.72994	6.69642	6.88118	6.71097	-4.26805	0.0045554	-1.17258	0.258739
CNAG_00585	hypothetical protein (1435 nt)	6.59958	6.65102	6.60232	4.639	4.62406	4.33633	6.15575	6.51306	6.25992	-4.24131	0.0107479	-1.23805	0.230541
CNAG_03789	mRNA turnover protein 4 (1153 nt)	8.16484	8.30666	8.28966	6.08815	6.41564	6.03664	7.75102	7.84803	7.90755	-4.2093	0.00894033	-1.33625	0.0606009
CNAG_03302	protein LTV1 (2161 nt)	6.28024	6.36821	6.26765	4.2426	4.37813	4.08702	5.98284	6.12859	6.09564	-4.19726	0.00650546	-1.178	0.0964762
CNAG_04348	chaperone (1634 nt)	7.33511	7.54757	7.3549	5.39062	5.59174	5.07993	7.24068	7.21505	7.08207	-4.16532	0.0100933	-1.17549	0.169107
CNAG_02502	ATP-dependent RNA helicase DBP3 (2397 nt)	6.61343	6.64191	6.62965	4.51466	4.70353	4.51798	6.42367	6.65779	6.49161	-4.13993	0.00757111	-1.07473	0.428586
CNAG_03817	cell growth-regulating nucleolar protein (1322 nt)	7.39686	7.70078	7.41983	5.59841	5.5217	5.26832	7.09035	7.13723	7.00095	-4.12106	0.00486424	-1.3469	0.132926
CNAG_07519	hypothetical protein (2861 nt)	4.01955	4.69356	4.59197	2.32557	2.39825	2.46384	3.61917	3.92948	3.40862	-4.11001	0.0251182	-1.72023	0.150646
CNAG_05144	carbonic anhydrase (1565 nt)	8.28966	8.35357	8.29816	6.34339	6.409	6.10825	8.24426	8.17684	8.11304	-4.07534	0.00958994	-1.09867	0.160993
CNAG_01354	hypothetical protein (2680 nt)	6.71305	6.86115	6.6115	4.75329	4.99306	4.38434	6.26638	6.46171	6.14198	-4.05116	0.0139767	-1.35523	0.113246
CNAG_04298	nucleolar complex protein 3 (2909 nt)	5.84842	5.97042	5.75962	3.89415	3.99453	3.68404	5.64861	5.69219	5.52523	-4.00531	0.00495046	-1.17893	0.147234
CNAG_06472	nucleolar protein 4 (3464 nt)	5.92089	6.09128	6.05378	4.00548	4.23524	3.83884	5.74099	5.78804	5.65275	-3.98743	0.0077565	-1.22665	0.0890314
CNAG_05755	protein MAK16 (1554 nt)	7.24235	7.43456	7.44187	5.38186	5.47034	5.39062	7.04592	7.20822	7.03093	-3.887	0.00545072	-1.21243	0.1326
CNAG_06341	hypothetical protein (1109 nt)	6.22661	6.24995	6.27533	4.24761	4.26249	4.38201	5.77578	6.16264	6.09482	-3.87248	0.00495046	-1.18062	0.328687
CNAG_01810	DNA-directed RNA polymerase I subunit RPA12 (971 nt)	6.03381	6.13383	6.19948	4.02135	4.36462	4.12906	5.85033	5.92565	5.8142	-3.86561	0.0067238	-1.19663	0.0963454
CNAG_03603	ATP-dependent RNA helicase HAS1 (2016 nt)	6.59534	6.61804	6.56	4.75084	4.7936	4.41641	6.57541	6.54383	6.36084	-3.83044	0.0143617	-1.07012	0.433985
CNAG_01140	ATP-dependent RNA helicase DRS1 (3171 nt)	6.1461	6.29063	6.09564	4.22542	4.43383	4.0886	5.84634	6.07533	5.93572	-3.80573	0.00573553	-1.16877	0.185384
CNAG_05884	importin beta-4 subunit (4410 nt)	6.50979	6.60083	6.50276	4.56273	4.78509	4.5046	6.44493	6.39684	6.30775	-3.78508	0.00719722	-1.11313	0.1475
CNAG_03675	pumilio domain-containing protein (2607 nt)	6.55687	6.8022	6.74577	4.78873	4.93522	4.66724	6.33307	6.42165	6.33653	-3.74392	0.00448812	-1.26388	0.130426
CNAG_06535	ribosome biogenesis protein UTP30 (1531 nt)	7.07892	7.19943	7.08207	5.19288	5.43201	5.04421	6.8475	6.78018	6.78752	-3.72466	0.00993947	-1.24408	0.0710714
CNAG_04222	protein SDA1 (2966 nt)	6.06131	6.16103	6.12482	4.12955	4.37538	4.15127	5.79731	6.05734	5.88076	-3.72434	0.00671261	-1.15182	0.238416
CNAG_06997	tRNA-dihydrouridine synthase 3 (3094 nt)	5.96016	6.12859	6.06464	4.2015	4.32745	4.01337	5.7615	5.87267	5.72203	-3.65622	0.00573553	-1.20225	0.100022
CNAG_01148	FK506-binding protein 4 (1981 nt)	9.08149	9.24665	9.18466	7.31834	7.48241	7.13484	8.98239	9.0909	8.98239	-3.62775	0.00694608	-1.1114	0.191612
CNAG_03645	NET1-associated nuclear protein 1 (U3 small nucleolar RNA-associated protein 17) (4036 nt)	7.05672	6.97211	6.88639	5.07687	5.23783	5.02352	7.00964	6.98228	6.94612	-3.62756	0.00422177	1.00529	0.934409
CNAG_03064	nucleolar protein 16 (1011 nt)	7.53916	7.73767	7.69816	5.84091	5.99701	5.56662	7.14865	7.357	7.09035	-3.62208	0.00875674	-1.37522	0.0895701
CNAG_01390	adenine phosphoribosyltransferase (967 nt)	9.13284	9.18466	9.14243	7.40999	7.50044	6.98103	8.86404	8.92965	8.76371	-3.62042	0.0220367	-1.23186	0.100768
CNAG_03964	zinc knuckle family protein (1341 nt)	6.32318	6.46803	6.39406	4.54308	4.58201	4.49791	6.07903	6.11637	6.04491	-3.61524	0.00422177	-1.244	0.0763923
CNAG_05401	hypothetical protein (2671 nt)	5.95857	6.26826	6.09347	4.10544	4.56993	4.0877	5.58177	5.81846	5.65379	-3.61102	0.0102781	-1.33987	0.113246
CNAG_03975	ribosome biogenesis protein ERB1 (2771 nt)	6.13461	6.25292	6.12973	4.43383	4.41149	4.17853	5.78895	5.8472	5.69024	-3.55816	0.00573553	-1.31673	0.0610668
CNAG_02437	rRNA biogenesis protein RRP5 (4971 nt)	5.56923	5.78278	5.70019	3.81877	4.02065	3.73867	5.46781	5.4301	5.40176	-3.54235	0.00476161	-1.1899	0.154246
CNAG_02060	hypothetical protein (1617 nt)	5.34301	5.4464	5.39427	3.90598	3.53555	3.29357	4.57561	4.75289	4.62359	-3.52152	0.0241758	-1.67466	0.0451355
CNAG_06126	Pin2-interacting protein X1 (1499 nt)	5.93245	6.23383	6.1819	4.261	4.45594	4.20056	5.89951	6.03179	5.85524	-3.50698	0.00495046	-1.13856	0.321601
CNAG_02328	pre-rRNA-processing protein TSR1 (3305 nt)	5.9231	6.14754	5.89013	4.14873	4.36925	4.02533	5.99973	6.02083	5.89145	-3.49628	0.00534274	-1.01133	0.91727
CNAG_00513	nucleolar protein 53 (1603 nt)	6.89921	7.0229	6.96734	5.074	5.46071	5.00922	6.65216	6.90688	6.8974	-3.43864	0.0165135	-1.10522	0.372583
CNAG_06318	ribosome biogenesis protein YTM1 (1686 nt)	6.67953	6.73779	6.717	5.11664	4.90458	4.80605	6.40269	6.52552	6.38497	-3.40821	0.0113716	-1.20892	0.0971773
CNAG_06379	N-acetyltransferase 10 (3664 nt)	5.70254	5.9248	5.77915	4.0448	4.18403	3.87155	5.66867	5.79931	5.75743	-3.40747	0.00524526	-1.04273	0.621079
CNAG_07878	nucleolar complex protein 2 (2652 nt)	6.79988	6.90185	6.79173	4.98648	5.28245	4.93441	6.40991	6.60232	6.5217	-3.39491	0.0107965	-1.2482	0.0900386
CNAG_00292	zinc finger protein (2168 nt)	7.05248	7.29648	7.16383	5.30695	5.63051	5.31648	7.00796	7.21749	6.93649	-3.37047	0.00588588	-1.08444	0.503801
CNAG_06741	ATP-dependent RNA helicase DBP10 (2669 nt)	5.67224	5.81271	5.66746	3.93482	4.19102	3.79055	5.52362	5.65797	5.61012	-3.35274	0.0101431	-1.08691	0.267721
CNAG_01877	GMP synthase [glutamine-hydrolyzing] (2132 nt)	8.39911	8.51889	8.51889	6.70525	6.92457	6.5966	8.4066	8.52532	8.34545	-3.333	0.00800333	-1.03754	0.613346
CNAG_03951	hypothetical protein (869 nt)	8.92965	9.04542	8.98239	7.39297	7.52371	6.8475	9.08149	9.24665	9.17464	-3.3198	0.0317907	1.13428	0.147234
CNAG_04370	U3 small nucleolar RNA-associated protein 10 (6707 nt)	4.78627	4.85705	4.69269	2.98371	3.22129	2.98371	4.74913	4.7133	4.61725	-3.28471	0.00532463	-1.06101	0.396257
CNAG_02672	nonsense-mediated mRNA decay protein 3 (2214 nt)	6.68347	6.87754	6.82426	5.20232	5.15403	4.89963	6.62268	6.66049	6.64623	-3.27108	0.00573553	-1.11108	0.254216
CNAG_01187	ribosome production factor 2 (1320 nt)	7.02181	7.3592	7.25906	5.56742	5.63919	5.32825	6.98488	6.8956	6.6694	-3.25292	0.00573553	-1.28645	0.172133
CNAG_06948	essential nuclear protein 1 (1786 nt)	6.79325	7.0349	6.91919	5.10385	5.42818	5.12665	6.75046	6.80387	6.72804	-3.2405	0.00588813	-1.11341	0.290655
CNAG_03921	hypothetical protein (2605 nt)	6.0032	6.23662	6.17859	4.33676	4.58285	4.41055	5.76324	5.83413	5.69427	-3.24019	0.00448812	-1.29737	0.0997231
CNAG_02378	H/ACA ribonucleoprotein complex subunit 2 (992 nt)	9.42485	9.52395	9.61395	7.89091	7.97464	7.61139	9.00314	9.25726	9.0909	-3.23837	0.00805587	-1.323	0.0961211
CNAG_06774	tRNA (guanine-N(7)-)-methyltransferase (1591 nt)	6.23383	6.42165	6.33307	4.67624	4.61671	4.61725	6.18355	5.99102	6.02511	-3.2328	0.00573553	-1.19993	0.128924
CNAG_06112	carbamoyl-phosphate synthase arginine-specific large chain (4050 nt)	7.22914	7.24586	7.11934	5.55921	5.72392	5.23379	7.22148	7.09219	6.97432	-3.23211	0.0173499	-1.07335	0.453453
CNAG_03602	U3 small nucleolar RNA-associated protein 5 (3139 nt)	7.98481	8.04205	8.00808	6.20118	6.40504	6.35844	7.93099	7.97831	7.95846	-3.22678	0.00725621	-1.03938	0.181527
CNAG_03762	AdoMet-dependent rRNA methyltransferase SPB1 (3103 nt)	6.01405	6.27755	6.14293	4.4183	4.59028	4.36332	5.75043	5.91338	5.91445	-3.22108	0.00448812	-1.21877	0.149389
CNAG_03300	ribosomal RNA-processing protein 1 (1460 nt)	6.82571	7.08311	6.94896	5.3555	5.29495	5.15191	6.57164	6.6744	6.64364	-3.21572	0.00448812	-1.25067	0.134254
CNAG_07657	U3 small nucleolar RNA-associated protein 19 (2565 nt)	5.66867	5.81574	5.57709	3.93351	4.14955	3.92612	5.51009	5.6161	5.50745	-3.21341	0.00448812	-1.10391	0.312967
CNAG_06340	pre-rRNA-processing protein TSR4 (1901 nt)	6.60692	6.58317	6.68607	4.81259	5.13618	4.91233	6.33653	6.36084	6.39836	-3.18587	0.0100099	-1.19759	0.0666994
CNAG_04694	periodic tryptophan protein 1 (2193 nt)	7.14587	7.22012	7.13872	5.40771	5.71101	5.37426	6.66544	6.8366	6.6149	-3.18343	0.0130274	-1.37802	0.0881737
CNAG_06611	DNA-directed RNA polymerase I subunit RPA2 (4313 nt)	6.20055	6.49661	6.29733	4.63579	4.76316	4.62504	5.9284	5.97422	5.86894	-3.15324	0.00641527	-1.32652	0.130369
CNAG_05402	protein CMS1 (1478 nt)	6.82218	6.71425	6.73381	5.15094	5.32583	4.82463	6.35899	6.50408	6.51108	-3.15203	0.0195979	-1.23003	0.0850255
CNAG_04365	ribosome biogenesis protein MAK21 (3902 nt)	5.84362	5.97965	6.01895	4.2971	4.42506	4.15885	5.80979	5.99941	5.81574	-3.14647	0.0049407	-1.05148	0.575159
CNAG_01171	hypothetical protein (682 nt)	6.18355	6.2185	6.20699	4.57708	4.87323	4.19993	5.91739	6.07795	5.91941	-3.14472	0.0334762	-1.174	0.151673
CNAG_02382	ribosome biogenesis protein BRX1 (1486 nt)	7.63561	7.76327	7.64557	6.15984	6.10908	5.83413	7.40342	7.45064	7.36515	-3.1321	0.0091779	-1.21006	0.0783908
CNAG_07502	CTP synthase (2740 nt)	7.3477	7.44038	7.3666	5.74428	5.90811	5.57632	7.32729	7.33945	7.25107	-3.12097	0.0108244	-1.05626	0.255972
CNAG_00142	hypothetical protein (3025 nt)	5.51837	5.65674	5.63658	3.96579	4.07307	3.85479	5.02411	5.28298	5.21995	-3.11525	0.00448812	-1.34557	0.0977962
CNAG_02235	hypothetical protein (1603 nt)	4.92863	5.06524	5.00336	3.38702	3.57827	3.11579	4.32645	4.58517	4.30608	-3.11389	0.0160549	-1.50857	0.087961
CNAG_05757	hypothetical protein (1595 nt)	5.65941	5.79263	5.8472	4.14659	4.1989	4.04759	5.48975	5.69844	5.72688	-3.10671	0.00422177	-1.09282	0.402561
CNAG_03205	ATP-dependent RNA helicase ROK1 (2123 nt)	6.03497	6.15139	6.16264	4.50003	4.452	4.49686	5.69128	5.94234	5.86686	-3.10236	0.00495046	-1.21658	0.148337
CNAG_00845	hypothetical protein (1512 nt)	6.70134	6.8658	6.72229	5.09605	5.12665	5.17228	6.45501	6.55085	6.42165	-3.09831	0.0053124	-1.22036	0.0921451
CNAG_07567	hypothetical protein (1317 nt)	6.42165	6.64623	6.45057	4.80115	5.07993	4.78873	6.31711	6.39105	6.20295	-3.06569	0.00573553	-1.15065	0.220983
CNAG_00429	tRNA-dihydrouridine synthase 1 (2335 nt)	4.81919	4.91562	4.90814	3.32161	3.59356	2.89466	4.65812	4.77372	4.42506	-3.05471	0.0343181	-1.19915	0.254304
CNAG_01639	elongation factor G, mitochondrial (3011 nt)	7.09499	7.1742	6.9307	5.50827	5.59006	5.2691	6.69393	6.67341	6.51212	-3.05425	0.00573553	-1.35674	0.08316
CNAG_06007	U3 small nucleolar RNA-associated protein 23 (1149 nt)	6.51108	6.69917	6.68511	4.85882	5.16592	5.0543	6.24163	6.35148	6.13831	-3.04289	0.00573553	-1.30856	0.0856357
CNAG_05854	hypothetical protein (1566 nt)	5.71725	5.86686	5.74804	4.27121	4.22619	4.03499	5.54985	5.68829	5.42563	-3.03126	0.00510286	-1.16699	0.206601
CNAG_04062	ribosome biogenesis protein ENP2 (3127 nt)	5.33077	5.43997	5.41297	3.72405	4.03113	3.63887	5.31834	5.48844	5.31729	-3.0242	0.0146813	-1.01388	0.857951
CNAG_06277	ribosomal RNA-processing protein 12 (4449 nt)	5.13392	5.33647	5.04706	3.60707	3.54266	3.57827	5.16468	5.08584	5.03738	-3.02406	0.0112807	-1.05447	0.620051
CNAG_07536	DNA-directed RNA polymerase I subunit RPA43 (1409 nt)	7.15283	7.15646	7.19078	5.46973	5.86326	5.39689	6.76067	6.71525	6.79173	-3.01063	0.0237651	-1.32943	0.0418661
CNAG_03055	bud site selection protein 20 (869 nt)	7.55322	7.76717	7.77337	6.16552	6.13993	6.02083	7.4454	7.49025	7.289	-3.00874	0.00528648	-1.22239	0.142346
CNAG_05101	U3 small nucleolar RNA-associated protein 12 (3421 nt)	6.17668	6.36324	6.2819	4.66906	4.77532	4.61406	5.92996	5.99192	5.96289	-3.00589	0.00422177	-1.24173	0.108783
CNAG_03912	membrane protein (2236 nt)	3.5448	3.81984	3.64723	2.19301	2.08643	1.97425	3.6241	3.88689	3.53795	-3.00229	0.00495046	1.0086	0.955645
CNAG_07676	ATP-dependent RNA helicase DBP2-A (3286 nt)	8.1471	8.12772	8.0739	6.45947	6.75046	6.38497	8.06615	8.04951	8.08355	-2.99925	0.0156798	-1.03514	0.279652
CNAG_01564	nucleolar protein 12 (2295 nt)	6.32247	6.45612	6.43197	4.95844	4.91893	4.58201	6.31832	6.29533	6.26921	-2.99743	0.0130298	-1.07865	0.240696
CNAG_05085	deoxyhypusine hydroxylase (1446 nt)	6.064	6.12613	6.07374	4.47933	4.56222	4.4808	5.94068	5.90569	5.95381	-2.99075	0.00268496	-1.11308	0.0658597
CNAG_04395	protein BFR2 (1712 nt)	6.50865	6.63753	6.63881	5.04971	5.12877	4.8658	6.30775	6.45947	6.23837	-2.99019	0.00573553	-1.19731	0.136971
CNAG_00149	NADH dehydrogenase (ubiquinone) 1 alpha subcomplex 4 (931 nt)	10.4207	10.5369	10.6556	9.04542	9.13284	8.70262	10.3736	10.46	10.46	-2.98443	0.0108119	-1.07666	0.408835
CNAG_07373	carbamoyl-phosphate synthase, large subunit (7732 nt)	6.08367	6.22349	5.95643	4.51512	4.6262	4.39519	6.63569	6.56252	6.50408	-2.98078	0.00486424	1.39433	0.0890314
CNAG_05202	SET domain-containing protein 6 (2299 nt)	6.50219	6.64364	6.31832	4.85216	5.10519	4.78429	6.44282	6.45612	6.34651	-2.97765	0.00573553	-1.05183	0.662505
CNAG_02546	transferase (1430 nt)	8.23899	8.281	8.28465	6.75966	6.84824	6.48075	8.18422	8.18745	8.02723	-2.97316	0.0169461	-1.09828	0.255342
CNAG_02880	GTP-binding protein YchF (1930 nt)	9.96213	10.0492	9.97589	8.50188	8.5565	8.26544	9.82082	9.8791	9.67522	-2.93728	0.0104955	-1.15192	0.177151
CNAG_06491	hypothetical protein (1143 nt)	4.27676	4.46042	4.31931	2.83815	2.73902	2.82035	3.82099	4.54734	4.04814	-2.93425	0.00486424	-1.15937	0.574828
CNAG_00764	ATP-dependent RNA helicase DBP4 (3282 nt)	5.05503	5.2159	5.21196	3.46757	3.94573	3.4119	4.70213	4.8681	4.9093	-2.93338	0.0225694	-1.2609	0.0997231
CNAG_00904	aflatoxin efflux pump AFLT (2473 nt)	4.43673	4.67568	4.42932	2.9022	3.19447	2.79445	4.31739	4.20242	4.18476	-2.92858	0.00770565	-1.2134	0.169152
CNAG_03634	DNA-directed RNA polymerase I subunit RPA49 (2671 nt)	5.028	5.21384	5.20232	3.52477	3.72894	3.55835	4.80527	4.75438	4.7952	-2.91608	0.00448812	-1.28619	0.109738
CNAG_02720	nuclear GTP-binding protein (2468 nt)	7.22012	7.40342	7.20183	5.66627	5.982	5.5455	7.10687	7.161	7.00424	-2.91575	0.0112973	-1.13636	0.217266
CNAG_06367	U3 small nucleolar RNA-associated protein 3 (2518 nt)	5.93963	6.06718	6.07903	4.30199	4.63363	4.52979	5.65021	5.89951	5.81654	-2.90823	0.00854827	-1.18088	0.178109
CNAG_01898	protein MAK11 (1930 nt)	6.18734	6.35899	6.29348	4.66377	4.85934	4.71028	5.71725	5.87917	5.71725	-2.89884	0.00422177	-1.42278	0.0580996
CNAG_05571	U3 small nucleolar RNA-associated protein 20 (8610 nt)	4.14659	4.40816	4.08248	2.64717	2.8975	2.53792	3.76975	3.88821	3.71749	-2.86436	0.00648669	-1.33848	0.132595
CNAG_06684	pre-rRNA-processing protein IPI3 (1748 nt)	5.42177	5.23379	5.2753	3.84994	3.8329	3.70068	5.1447	5.13921	5.09224	-2.85953	0.00422177	-1.13674	0.197572
CNAG_07494	U3 small nucleolar RNA-associated protein MPP10 (2763 nt)	6.31711	6.39335	6.25331	4.66431	4.91041	4.8469	6.12613	6.24429	6.0663	-2.85611	0.00573553	-1.1295	0.176669
CNAG_00441	inosine-5'-monophosphate dehydrogenase (2150 nt)	9.21829	9.32552	9.23306	7.82124	7.79333	7.63355	9.02966	9.15288	9.04943	-2.84727	0.00486424	-1.13417	0.115039
CNAG_00906	nucleolar pre-ribosomal-associated protein 1 (6605 nt)	5.08314	5.17508	5.07515	3.64536	3.60148	3.56296	4.73042	4.72785	4.67291	-2.84387	0.00337423	-1.32017	0.0486395
CNAG_05473	hypothetical protein (1194 nt)	6.25565	6.45947	6.43074	5.06524	4.92617	4.65295	6.15502	6.05048	5.75805	-2.8294	0.0101807	-1.31412	0.175806
CNAG_04367	hypothetical protein (1430 nt)	4.70353	4.79308	4.98501	3.33299	3.46634	3.19199	4.38127	4.59197	4.41779	-2.8221	0.00534274	-1.28657	0.123826
CNAG_04175	hypothetical protein (3704 nt)	4.96602	5.2927	5.08389	3.51364	3.71351	3.63219	4.72608	4.89089	4.72639	-2.81751	0.0067238	-1.2597	0.164382
CNAG_01600	ribosome assembly protein RRB1 (1703 nt)	6.33954	6.44755	6.31048	5.014	4.95844	4.64313	6.29836	6.16835	6.06131	-2.81669	0.0130274	-1.14064	0.221651
CNAG_06252	hypothetical protein (3034 nt)	3.63973	4.07636	3.65087	2.13124	2.4071	2.37297	3.70793	3.82323	3.72235	-2.7996	0.0116245	-1.02656	0.885174
CNAG_01379	hypothetical protein (675 nt)	7.3666	7.36752	7.09035	5.89865	5.79595	5.69276	6.8759	7.1119	7.15013	-2.78763	0.00615752	-1.1719	0.287577
CNAG_06127	ribosome biogenesis protein NSA2 (1606 nt)	7.1742	7.46971	7.36176	5.95575	5.85341	5.77191	7.23474	7.23944	7.24235	-2.77958	0.00592194	-1.06909	0.534249
CNAG_01641	DNA polymerase phi subunit (4173 nt)	6.09947	6.31916	6.13571	4.65147	4.9316	4.5666	6.31316	6.37716	6.31653	-2.76681	0.00797904	1.11021	0.29182
CNAG_06273	hypothetical protein (1261 nt)	7.33687	7.28678	7.22914	5.93103	5.90659	5.62662	7.0979	7.18922	7.05672	-2.75652	0.0118865	-1.12479	0.126209
CNAG_01812	large subunit ribosomal protein L24e (1213 nt)	7.71232	7.79734	7.66325	6.35657	6.32717	6.11472	7.62693	7.54757	7.37327	-2.74756	0.00623529	-1.15539	0.220922
CNAG_06242	high-affinity iron permease CaFTR1 (2327 nt)	6.46439	6.54293	6.5325	5.07445	5.40566	4.69297	6.10313	6.15575	5.93368	-2.74267	0.0411916	-1.36518	0.0914695
CNAG_07889	hypothetical protein (1227 nt)	6.86774	6.98642	6.82159	5.4962	5.53898	5.2753	6.69917	6.88639	6.74698	-2.74174	0.00588588	-1.08253	0.351721
CNAG_03891	hsp60-like protein (2144 nt)	9.85068	9.85068	9.80937	8.44882	8.46776	8.23605	10.0492	10.085	9.86038	-2.7372	0.0112443	1.11829	0.285421
CNAG_00394	diphthamide biosynthesis protein 3 (855 nt)	3.86046	3.94516	3.79378	2.28587	2.49173	2.46494	3.27283	3.44922	3.75825	-2.73641	0.00486424	-1.29507	0.246363
CNAG_06005	U3 small nucleolar RNA-associated protein 4 (3191 nt)	5.29545	5.42353	5.32618	4.0004	4.06932	3.62915	5.24241	5.3138	5.15977	-2.72973	0.0194578	-1.07902	0.279813
CNAG_03231	hypothetical protein (2422 nt)	3.83005	4.14873	3.51175	2.77737	2.11563	2.26978	3.48003	3.90059	3.62915	-2.71807	0.0204876	-1.11748	0.649324
CNAG_00259	bud site selection protein (1347 nt)	7.23291	7.26276	7.34454	5.76946	6.05557	5.68779	7.2643	7.31652	7.35019	-2.71784	0.0146813	1.0212	0.646492
CNAG_06865	translation machinery-associated protein 16 (1490 nt)	6.71831	6.90955	6.8759	5.23036	5.6436	5.30335	6.5151	6.52297	6.59208	-2.71726	0.012731	-1.22366	0.117183
CNAG_01288	solute carrier family 25, member 33/36 (1890 nt)	5.9722	5.88302	5.83836	4.60786	4.54854	4.21353	5.61765	5.75589	5.50827	-2.71549	0.0160907	-1.2063	0.149331
CNAG_00762	diphthamide biosynthesis protein 1 (2069 nt)	4.84745	5.10451	5.1369	3.60291	3.63635	3.52663	4.54103	4.58614	4.36858	-2.71508	0.0105595	-1.44496	0.087961
CNAG_04571	dimethyladenosine transferase (1776 nt)	6.30242	6.409	6.45836	4.99366	4.95207	4.90685	6.31048	6.29206	6.2639	-2.71146	0.00448812	-1.0726	0.29444
CNAG_01946	allantoate permease (2304 nt)	4.72701	4.72869	4.7245	3.41072	3.4251	3.03178	4.97787	4.73042	4.95038	-2.70857	0.0238868	1.11689	0.326602
CNAG_04376	protein KRI1 (2624 nt)	5.86894	5.97913	5.79263	4.42932	4.71556	4.19481	5.4957	5.73085	5.62662	-2.70133	0.0195979	-1.19956	0.147373
CNAG_00086	N2,N2-dimethylguanosine tRNA methyltransferase (2407 nt)	5.71198	5.8142	5.81654	4.20766	4.63166	4.20242	5.32791	5.57564	5.5007	-2.70131	0.0222801	-1.24214	0.133173
CNAG_03897	protein BCP1 (1259 nt)	6.69393	6.84171	6.87033	5.43306	5.32618	5.36775	6.36719	6.44201	6.26638	-2.68762	0.00486424	-1.35987	0.066379
CNAG_04259	H/ACA ribonucleoprotein complex subunit 1 (1093 nt)	8.88125	8.90289	8.83044	7.54757	7.45663	7.33511	8.88806	9.01332	8.81475	-2.68532	0.00725621	1.02374	0.744716
CNAG_02917	hypothetical protein (1672 nt)	8.57742	8.59943	8.64366	7.30145	7.23291	7.05504	8.14343	8.17785	8.02485	-2.65806	0.0101556	-1.40587	0.0650703
CNAG_01432	ribosome assembly protein 4 (2094 nt)	6.58811	6.67953	6.73078	5.3169	5.32901	5.15094	6.51306	6.56536	6.62875	-2.63997	0.00448812	-1.06961	0.291188
CNAG_00104	elongation factor 3 (4024 nt)	6.10644	6.32894	6.14754	4.80346	4.82463	4.75329	6.13831	6.12331	6.00068	-2.63996	0.00869726	-1.07689	0.42536
CNAG_02412	rRNA-processing protein CGR1 (611 nt)	7.81346	8.15346	7.99656	6.64108	6.5842	6.55166	7.59784	7.84446	8.03155	-2.63082	0.0139644	-1.11978	0.521031
CNAG_00809	ATP-dependent RNA helicase ded1 (2987 nt)	6.73206	6.68215	6.61343	5.19458	5.41008	5.24525	6.53783	6.59857	6.55313	-2.62547	0.00573553	-1.08125	0.179211
CNAG_03513	ribosomal RNA-processing protein 7 (1396 nt)	6.6115	6.66426	6.56898	5.28116	5.29195	5.10013	6.1819	6.37348	6.43633	-2.6217	0.00615752	-1.21785	0.164303
CNAG_00899	hypothetical protein (2844 nt)	4.99237	5.24387	5.05251	3.71429	3.76003	3.64609	4.70781	4.87107	4.81919	-2.61978	0.00757111	-1.2285	0.140347
CNAG_02958	ferroxidase (3140 nt)	3.11713	3.27148	3.30297	1.84428	1.90479	1.78074	2.36469	2.54253	2.38666	-2.61582	0.00486424	-1.74018	0.0418661
CNAG_04356	TPR repeat-containing protein (2945 nt)	5.04769	5.12357	5.10385	3.81769	3.7718	3.52477	4.85571	4.7444	4.85763	-2.61525	0.0131797	-1.20786	0.0740182
CNAG_06248	protein TIF31 (5134 nt)	5.8935	5.95857	5.88736	4.47531	4.61219	4.49526	5.67224	5.75878	5.64007	-2.61273	0.00448812	-1.16698	0.082405
CNAG_01236	rRNA-processing protein EBP2 (1636 nt)	8.00439	8.03536	8.0447	6.60958	6.76067	6.55817	7.59109	7.71232	7.71232	-2.61234	0.00960871	-1.28009	0.0783908
CNAG_05199	chaperone DnaK (2794 nt)	9.90066	9.8791	9.77582	8.44457	8.63314	8.34166	10.1034	10.1506	10.001	-2.60041	0.00839108	1.1754	0.100769
CNAG_00166	ATP-dependent RNA helicase DBP8 (2238 nt)	5.18961	5.28033	5.12308	3.78517	3.95642	3.71964	4.93522	5.11827	5.014	-2.59775	0.00559186	-1.1291	0.189117
CNAG_05801	hypothetical protein (1092 nt)	5.14662	5.39689	5.18806	3.88079	4.02135	3.70288	5.03519	5.04421	5.07931	-2.59461	0.00589103	-1.14152	0.270185
CNAG_06766	U3 small nucleolar RNA-associated protein 14 (3315 nt)	5.57314	5.61865	5.51573	4.08729	4.32324	4.17066	5.07349	5.26717	5.09717	-2.59447	0.00712014	-1.34092	0.0820856
CNAG_02317	protein arginine N-methyltransferase 3 (2137 nt)	6.03599	6.15189	6.04357	4.71694	4.82921	4.57404	5.84488	5.7662	5.61906	-2.58546	0.00661037	-1.2603	0.108205
CNAG_06645	methylenetetrahydrofolate dehydrogenase (NAD ) (1402 nt)	7.49025	7.65598	7.58503	6.30571	6.2819	6.03864	7.1742	7.29291	7.06494	-2.58172	0.00702403	-1.31927	0.0834994
CNAG_04516	WSC domain-containing protein (646 nt)	5.61689	5.63735	5.63051	4.34087	4.19205	4.25331	5.62183	5.31508	5.1085	-2.57786	0.0076974	-1.21401	0.351721
CNAG_07855	midasin (16008 nt)	3.63564	3.73483	3.64364	2.28786	2.43347	2.19616	3.51735	3.51458	3.36008	-2.57673	0.0067304	-1.15458	0.136971
CNAG_02209	nucleolar protein 56 (2129 nt)	8.05382	8.13029	8.08131	6.65388	6.95238	6.56389	7.86776	7.88826	7.94757	-2.57592	0.0199202	-1.13861	0.0678887
CNAG_07735	U3 small nucleolar RNA-associated protein 25 (2546 nt)	5.58177	5.8698	5.65572	4.3745	4.41949	4.22099	5.38989	5.28654	5.13125	-2.57416	0.00589729	-1.35022	0.108765
CNAG_05789	hypothetical protein (1437 nt)	6.20559	6.14827	6.15032	4.82729	5.04421	4.55464	6.06968	5.94744	6.05048	-2.56569	0.027189	-1.10614	0.149026
CNAG_06758	efflux protein (2609 nt)	3.86982	4.17944	4.12371	2.49305	2.6038	2.9985	3.45256	3.67765	3.48203	-2.56544	0.0145299	-1.4342	0.0949198
CNAG_05360	ATP-dependent RNA helicase MAK5 (2747 nt)	5.48438	5.61689	5.56599	4.21618	4.35995	4.02065	5.17325	5.42726	5.31114	-2.56121	0.0113271	-1.19075	0.169697
CNAG_05573	cytochrome c oxidase assembly protein subunit 17 (977 nt)	6.98873	6.88437	6.98103	5.73085	5.57709	5.48598	6.6694	6.69236	6.83876	-2.55514	0.00692925	-1.16301	0.132595
CNAG_01574	hypothetical protein (3066 nt)	4.22871	4.48715	4.20858	2.97466	3.15565	2.74502	4.07831	4.14699	4.10926	-2.54859	0.00880653	-1.14601	0.298563
CNAG_01179	DNA-directed RNA polymerase I and III subunit RPAC1 (1705 nt)	6.89638	6.99934	6.95105	5.61469	5.73421	5.44917	6.90185	6.81863	6.78482	-2.54836	0.0100648	-1.08209	0.191217
CNAG_06412	rRNA-processing protein EFG1 (1335 nt)	6.68849	6.92682	6.68849	5.40916	5.57871	5.26952	6.34219	6.51797	6.40182	-2.54701	0.00588588	-1.27215	0.122317
CNAG_02155	hypothetical protein (1604 nt)	3.32731	3.30297	3.02396	1.77185	2.01427	1.82193	3.16172	3.05426	3.13529	-2.54688	0.00673679	-1.07251	0.561157
CNAG_01715	ribosome biogenesis protein BMS1 (3867 nt)	5.64476	5.8856	5.79503	4.37762	4.59068	4.32119	5.37295	5.583	5.50532	-2.54083	0.00573553	-1.22098	0.138947
CNAG_01629	multifunctional methyltransferase subunit TRM112 (885 nt)	7.42995	7.73279	7.66967	6.35352	6.30775	6.13734	7.05045	6.90311	6.92256	-2.5396	0.00655184	-1.57146	0.0794532
CNAG_05234	mitochondrial import inner membrane translocase subunit TIM54 (1457 nt)	6.75284	6.80078	6.74698	5.41764	5.38597	5.46387	6.55085	6.6149	6.47778	-2.5392	0.00268496	-1.16394	0.105841
CNAG_06363	nucleolar protein (1955 nt)	5.49205	5.46497	5.49321	4.12691	4.18476	4.10906	5.09165	4.83136	4.91893	-2.53708	0.00422177	-1.45004	0.105285
CNAG_04236	pyridoxal phosphate phosphatase phospho2 (1075 nt)	7.78993	7.78273	7.75102	6.48075	6.55817	6.262	7.72036	7.77157	7.73024	-2.53313	0.0157563	-1.02373	0.313443
CNAG_00706	RNA-binding protein rnp24 (1669 nt)	6.05378	6.25916	6.25494	4.70255	5.00398	4.84441	5.9688	6.10777	6.13734	-2.52972	0.00588588	-1.08522	0.398894
CNAG_06228	MIF4G/MA4 domain-containing protein (3549 nt)	5.24339	5.34839	5.31508	4.06028	4.1874	3.64949	4.84051	4.95276	4.74602	-2.52549	0.0314291	-1.3716	0.0741785
CNAG_02101	hypothetical protein (2369 nt)	4.5004	4.6836	4.63395	3.47687	3.14253	3.19375	4.33248	4.55086	4.21618	-2.52263	0.00970336	-1.18056	0.25859
CNAG_01404	hsp71-like protein (2264 nt)	8.33011	8.43191	8.40203	7.11475	7.09035	6.96118	8.25773	8.20127	8.18422	-2.51855	0.00448812	-1.12788	0.0887105
CNAG_06919	rRNA 2'-O-methyltransferase fibrillarin (1589 nt)	8.54941	8.50188	8.4838	7.22766	7.25	7.06688	8.29418	8.35357	8.22621	-2.51434	0.00734241	-1.16504	0.0900386
CNAG_07630	U3 small nucleolar ribonucleoprotein IMP4 (1545 nt)	7.11934	7.31652	7.21749	5.75476	6.00497	5.90569	6.85221	7.04079	6.89921	-2.51282	0.00532463	-1.22014	0.114137
CNAG_03284	rRNA biogenesis protein RRP36 (1593 nt)	5.94146	6.06968	6.22661	4.64374	4.92326	4.68667	6.33784	6.25916	6.22791	-2.51059	0.00588588	1.1453	0.269084
CNAG_01755	hypothetical protein (3321 nt)	5.62245	5.72491	5.68829	4.38887	4.43637	4.23579	5.43306	5.39359	5.36523	-2.50511	0.00573553	-1.21526	0.0589594
CNAG_05627	ATP-dependent rRNA helicase SPB4 (2642 nt)	5.01688	5.09002	5.04769	3.62116	3.94841	3.61628	4.55976	4.81715	4.67452	-2.50171	0.019029	-1.29031	0.128367
CNAG_04802	ribosomal RNA-processing protein 9 (2062 nt)	6.34154	6.40504	6.1391	4.94547	5.11084	4.86142	5.94146	6.06235	5.87821	-2.50125	0.00573553	-1.26099	0.130426
CNAG_04147	ATP-dependent rRNA helicase RRP3 (1741 nt)	5.60716	5.66627	5.56473	4.37608	4.2638	4.23628	5.34131	5.30856	5.23229	-2.49781	0.00422177	-1.24718	0.0545537
CNAG_01593	ribosome biogenesis protein SSF1/2 (1748 nt)	6.62268	6.8399	6.82755	5.43458	5.56791	5.33564	6.49565	6.59277	6.39335	-2.49205	0.00530062	-1.20535	0.149984
CNAG_00613	cytosine deaminase (2243 nt)	5.64764	5.83986	5.67346	4.57984	4.33724	4.29533	5.12126	5.17736	5.17678	-2.49006	0.00661037	-1.47616	0.0757297
CNAG_01146	U3 small nucleolar RNA-associated protein 22 (4208 nt)	5.46121	5.53138	5.456	4.09775	4.35889	4.05554	5.24003	5.35944	5.27072	-2.48309	0.0146571	-1.14298	0.0962339
CNAG_00775	U3 small nucleolar RNA-associated protein 15 (2125 nt)	5.47687	5.44063	5.67024	4.12076	4.37269	4.16903	5.29376	5.43783	5.23487	-2.4767	0.00573553	-1.15436	0.224114
CNAG_03426	GDP-mannose transporter 2 (1928 nt)	5.67914	5.76946	5.64764	4.4541	4.4262	4.30438	4.73217	4.5004	4.42039	-2.46888	0.00422177	-2.2157	0.0598833
CNAG_06324	zinc finger protein (1517 nt)	5.29612	5.4389	5.45988	4.25842	4.02989	4.01536	5.39427	5.1887	5.32618	-2.45731	0.00588813	-1.06825	0.455246
CNAG_00603	pre-rRNA-processing protein PNO1 (1331 nt)	6.6996	6.67535	6.71589	5.47034	5.41895	5.31239	6.36614	6.41727	6.31711	-2.45614	0.00733835	-1.25711	0.0617195
CNAG_06798	U3 small nucleolar RNA-associated protein 18 (2596 nt)	5.55749	5.82342	5.77702	4.44915	4.54103	4.27859	5.56923	5.73932	5.51573	-2.45614	0.00573553	-1.08014	0.51073
CNAG_03293	pre-rRNA-processing protein TSR2 (907 nt)	7.54053	7.66325	7.54513	6.30924	6.44493	6.10694	7.34846	7.40092	7.33208	-2.45536	0.0115936	-1.16674	0.0991728
CNAG_03124	periodic tryptophan protein 2 (3370 nt)	5.96563	6.01691	5.84488	4.67568	4.77289	4.49385	5.82693	5.86326	5.85235	-2.45376	0.00650547	-1.06803	0.349999
CNAG_04976	zuotin (1788 nt)	8.62386	8.76913	8.69345	7.47457	7.45806	7.28355	8.51212	8.51212	8.39911	-2.44542	0.0049757	-1.16557	0.102509
CNAG_01696	chaperone DnaJ (2272 nt)	7.52558	7.58503	7.36432	6.22103	6.30472	6.07903	7.73024	7.81346	7.66516	-2.44537	0.00510286	1.1848	0.150646
CNAG_00785	ATP-dependent RNA helicase eIF4A (3881 nt)	9.40081	9.46218	9.44922	8.16026	8.34545	7.95452	9.27682	9.37458	9.29607	-2.43512	0.0211611	-1.08792	0.133848
CNAG_02185	nuclear protein (2756 nt)	4.2971	4.50841	4.42237	3.29589	3.31368	2.77035	4.57708	4.52899	4.25445	-2.43286	0.0309225	1.03112	0.823095
CNAG_01189	DNA-directed RNA polymerase I subunit RPA1 (5931 nt)	5.83355	5.9729	5.80075	4.52641	4.74262	4.49074	5.81985	5.89408	5.68067	-2.43256	0.00588588	-1.05035	0.583205
CNAG_05976	nucleolar protein 58 (2079 nt)	7.81648	7.86437	7.85896	6.51633	6.74903	6.43197	7.68091	7.56073	7.54513	-2.42978	0.0174029	-1.19004	0.106129
CNAG_03061	multiple drug resistance protein (5495 nt)	4.55404	4.75629	4.77372	3.41417	3.52663	3.30411	4.92939	4.84329	4.83136	-2.42791	0.00532463	1.12766	0.257562
CNAG_02982	U3 small nucleolar RNA-associated protein 13 (3309 nt)	5.50208	5.67417	5.55578	4.28911	4.51061	4.09646	5.11361	5.18094	5.135	-2.42607	0.0148339	-1.35112	0.0754224
CNAG_02338	cellular nucleic acid-binding protein (1617 nt)	10.6448	10.5906	10.6743	9.34073	9.48673	9.24665	10.5258	10.6175	10.5369	-2.42591	0.00894508	-1.05445	0.254943
CNAG_04580	RNA helicase (4261 nt)	5.47849	5.54486	5.56356	4.25696	4.36057	4.13567	5.27337	5.3377	5.3169	-2.42487	0.00759129	-1.16445	0.0628359
CNAG_02714	elongation factor 1-beta (3199 nt)	10.2557	10.4207	10.2668	9.17824	9.05759	8.88806	10.3098	10.323	10.1893	-2.41684	0.00673679	-1.0284	0.711418
CNAG_06206	ATP-dependent RNA helicase DBP9 (2234 nt)	6.30098	6.38931	6.1578	5.02247	5.08314	4.92816	5.92649	6.16103	5.93963	-2.41402	0.00569417	-1.20886	0.169697
CNAG_01132	nucleolar protein 6 (1351 nt)	6.31832	6.51212	6.59534	5.15191	5.33077	5.13198	6.13298	6.18664	6.12482	-2.41223	0.00583194	-1.2545	0.162952
CNAG_03510	large subunit ribosomal protein L36e (1852 nt)	9.86952	10.001	9.86038	8.82624	8.59199	8.51212	9.83304	9.86038	9.61395	-2.40635	0.00993947	-1.1028	0.361301
CNAG_03415	hypothetical protein (1087 nt)	4.9118	5.15738	4.60913	3.66309	3.62915	3.58804	4.64534	4.80288	4.42659	-2.40495	0.034425	-1.204	0.400521
CNAG_04037	hypothetical protein (819 nt)	7.54315	7.72404	7.45806	6.36614	6.43819	6.12331	7.31834	7.44956	7.35086	-2.40472	0.00702403	-1.15042	0.242314
CNAG_01310	nucleolar protein (1734 nt)	5.6843	5.91445	5.73566	4.67046	4.3998	4.47726	5.8149	5.94068	5.81082	-2.39878	0.00573553	1.05506	0.557382
CNAG_00743	imidazoleglycerol phosphate synthase, cyclase subunit (2208 nt)	6.8759	6.79576	6.69917	5.53394	5.6161	5.4389	6.79468	6.69393	6.5966	-2.396	0.00448812	-1.06822	0.439077
CNAG_05130	hypothetical protein (3331 nt)	5.21047	5.18162	5.34706	3.88903	4.13627	3.94218	5.62896	5.45455	5.86282	-2.39035	0.00573553	1.3217	0.175716
CNAG_00386	translation initiation factor 4G (3903 nt)	6.55313	6.58714	6.49759	5.28654	5.31729	5.30497	6.58256	6.59016	6.54075	-2.36694	0.00486424	1.01762	0.605892
CNAG_01687	Atypical/RIO/RIO2 protein kinase (2247 nt)	6.03316	6.20897	5.9284	4.77122	4.93245	4.75381	6.00116	6.04491	6.07533	-2.3582	0.00629961	-1.01142	0.91179
CNAG_02809	tRNA-specific adenosine deaminase 3 (2792 nt)	4.8681	5.11237	4.96469	3.76249	3.73647	3.73647	5.21047	5.20555	5.18491	-2.35638	0.0136154	1.1636	0.220534
CNAG_04114	small subunit ribosomal protein S0 (2070 nt)	10.2127	10.2557	10.3098	9.03975	9.17824	8.85414	10.085	10.0685	9.9901	-2.35439	0.0143706	-1.15792	0.0740182
CNAG_02301	lupus La protein (2075 nt)	8.29418	8.4066	8.39268	7.10252	7.238	7.05846	7.71889	7.95452	7.74674	-2.3481	0.00486424	-1.47199	0.0781537
CNAG_01953	hypothetical protein (2694 nt)	3.34167	3.12554	3.22634	1.83938	2.32403	1.83589	3.56296	3.69395	3.74494	-2.34798	0.0265158	1.35294	0.0740908
CNAG_04517	hypothetical protein (905 nt)	6.1888	6.24087	6.10825	4.89714	5.23379	4.71694	6.10694	6.30312	6.13165	-2.3457	0.0295103	1.00088	0.991691
CNAG_00449	RNA-binding protein NOB1 (2568 nt)	5.52295	5.64007	5.65941	4.34683	4.45352	4.34058	5.33647	5.48975	5.45753	-2.34107	0.00422177	-1.13254	0.15665
CNAG_03476	spermidine synthase (3350 nt)	7.59109	7.68091	7.55322	6.37853	6.5151	6.27618	7.57721	7.57145	7.52221	-2.327	0.00648669	-1.03631	0.467353
CNAG_04355	hypothetical protein (1629 nt)	4.65947	4.79407	4.69595	3.37088	3.66127	3.46382	4.16815	4.15511	4.03685	-2.32598	0.00956448	-1.512	0.0418661
CNAG_01273	cellular nucleic acid-binding protein (1857 nt)	8.75465	8.86853	8.88806	7.6434	7.67302	7.54315	8.55226	8.64366	8.49907	-2.32499	0.00422177	-1.20755	0.0834994
CNAG_04044	U3 small nucleolar RNA-associated protein 6 (1824 nt)	5.68779	5.9292	5.68779	4.61092	4.63579	4.40816	5.79173	5.57632	5.59087	-2.32405	0.00588588	-1.08319	0.49605
CNAG_02960	RNA exonuclease 4 (1771 nt)	5.12566	5.30123	5.36703	4.00155	4.0923	4.05081	5.06327	5.07445	4.9389	-2.3237	0.00963292	-1.18026	0.17439
CNAG_00976	carbamoyl-phosphate synthase, small subunit (1913 nt)	8.55226	8.6056	8.41202	7.36982	7.32521	7.238	8.03155	8.12772	7.94487	-2.31704	0.00510286	-1.40307	0.0640745
CNAG_04192	phosphoribosylformylglycinamidine synthase (4833 nt)	6.25292	6.26921	6.10644	4.93522	5.1085	4.94942	6.07457	6.14668	6.06547	-2.31628	0.00454178	-1.08219	0.28891
CNAG_03457	arginine-tRNA ligase (2483 nt)	8.03536	8.10754	7.94064	6.8598	6.97432	6.6143	7.84803	7.93631	7.80854	-2.31611	0.0127833	-1.12004	0.175469
CNAG_01749	hypothetical protein (1255 nt)	4.98161	5.17453	4.82921	3.81166	3.94953	3.59356	4.93088	5.15191	4.83792	-2.3137	0.00869992	-1.01505	0.925605
CNAG_01168	H/ACA ribonucleoprotein complex subunit 4 (2124 nt)	8.59693	8.74027	8.7091	7.40522	7.62693	7.38476	8.06124	8.16026	8.08888	-2.31305	0.00725621	-1.49344	0.0420337
CNAG_03310	nicotinamide N-methyltransferase (1223 nt)	6.05734	6.22912	6.05914	4.87141	4.95435	4.89504	5.80019	5.87759	5.75878	-2.31061	0.00669296	-1.23372	0.0992702
CNAG_03342	tRNA (guanine-N(7)-)-methyltransferase subunit TRM82 (2061 nt)	5.9093	6.05048	5.95158	4.89586	4.96357	4.43031	6.06855	5.84941	5.80242	-2.30891	0.0350865	-1.04511	0.671527
CNAG_01353	hypothetical protein (2160 nt)	4.25331	4.15811	4.37538	3.08631	3.02794	3.05426	4.10042	4.2144	4.14382	-2.30712	0.010104	-1.07877	0.373498
CNAG_02162	U3 small nucleolar RNA-associated protein 24 (1126 nt)	7.06083	7.0851	7.04592	5.8527	6.05229	5.67024	6.72804	6.67645	6.66049	-2.30623	0.0235945	-1.2974	0.0418661
CNAG_03301	mitochondrial import inner membrane translocase subunit TIM13 (807 nt)	9.18466	9.25726	9.24665	8.13869	8.11304	7.82977	9.23306	9.29607	9.24665	-2.30116	0.0179294	1.02036	0.537122
CNAG_03878	hypothetical protein (1666 nt)	5.9614	6.19868	6.2185	4.84645	5.12923	4.81156	5.91635	5.94851	6.17722	-2.2928	0.00805587	-1.08085	0.542563
CNAG_07952	hypothetical protein (801 nt)	5.0249	5.07872	5.0907	3.75644	4.09978	3.75179	4.79773	5.07277	4.84556	-2.29014	0.0234457	-1.11684	0.345481
CNAG_07957	WD repeat and SOF domain-containing protein 1 (1978 nt)	6.07795	6.11127	6.00966	4.84967	5.02411	4.74316	5.95484	6.12026	5.95643	-2.28782	0.0112148	-1.03942	0.583105
CNAG_03001	multiple RNA-binding domain-containing protein 1 (3227 nt)	5.49141	5.63555	5.60893	4.32012	4.43474	4.40727	5.31599	5.19458	5.2247	-2.28351	0.00422177	-1.2601	0.0688123
CNAG_03954	ribosomal RNA-processing protein 17 (1145 nt)	5.49469	5.70973	5.5455	4.35754	4.52728	4.30216	5.69844	5.9093	5.73566	-2.2778	0.00559186	1.14697	0.230541
CNAG_06748	U3 small nucleolar RNA-associated protein 7 (2362 nt)	5.95484	6.08221	6.02511	4.82349	5.06578	4.6149	5.64007	5.71843	5.71198	-2.2752	0.0239375	-1.2575	0.0606009
CNAG_07695	gamma-aminobutyric acid transporter (3341 nt)	7.24586	7.09219	6.77666	5.92146	5.93103	5.70973	7.66516	7.48036	7.55749	-2.27232	0.017494	1.44336	0.156659
CNAG_03414	hypothetical protein (1402 nt)	4.91315	4.93806	4.91233	3.76975	3.68179	3.78436	4.48143	4.89437	4.92326	-2.2593	0.00581402	-1.11329	0.543531
CNAG_07980	hypothetical protein (1252 nt)	3.25376	2.85264	2.79081	2.05537	1.89005	1.42831	3.02794	2.8847	2.49173	-2.25714	0.026022	-1.1206	0.629977
CNAG_01665	tRNA-splicing endonuclease subunit Sen34 (1220 nt)	5.30173	5.39262	5.48732	4.37269	4.31093	3.9803	5.00871	4.9041	4.83313	-2.25415	0.0168344	-1.39336	0.0606009
CNAG_01130	hypothetical protein (3332 nt)	6.10908	6.17411	6.08367	4.99306	5.04971	4.81661	6.05826	6.06131	5.94382	-2.24881	0.00941076	-1.07263	0.242794
CNAG_06002	tRNA (5-methylaminomethyl-2-thiouridylate)-methyltransferase (2496 nt)	4.75702	4.98868	4.97928	3.80776	3.81637	3.59459	4.57243	4.85521	4.61952	-2.24818	0.00588588	-1.16954	0.265062
CNAG_03892	chaperonin GroES (995 nt)	10.3098	10.323	10.1119	9.23306	9.06564	8.93995	10.5006	10.5693	10.2864	-2.24807	0.00671261	1.15178	0.281132
CNAG_02740	hypothetical protein (1513 nt)	5.00336	5.15363	5.00805	3.92382	3.75353	3.98196	5.10013	5.02741	4.82349	-2.2479	0.00573553	-1.05069	0.645255
CNAG_07409	DNA-directed RNA polymerase, mitochondrial (4467 nt)	5.44063	5.65021	5.46387	4.31392	4.44495	4.30029	5.39947	5.36573	5.38849	-2.24262	0.00573553	-1.09708	0.327031
CNAG_05603	hypothetical protein (2052 nt)	5.31648	5.26757	5.18589	4.11474	4.24575	3.91786	5.2247	5.24571	5.15629	-2.24057	0.0130242	-1.03365	0.524442
CNAG_07537	mitochondrial GTPase 1 (1820 nt)	4.34087	4.67452	4.67452	3.33944	3.48542	3.3799	3.98704	4.32595	4.40322	-2.23723	0.0165025	-1.25229	0.270484
CNAG_03820	nucleolar protein 14 (3294 nt)	6.1177	6.15575	6.22613	4.89151	5.19224	4.93385	5.85341	6.01997	5.93702	-2.23559	0.0144522	-1.17261	0.111153
CNAG_02330	large subunit ribosomal protein L21e (2442 nt)	10.5546	10.5546	10.5258	9.52395	9.38424	9.25726	10.3456	10.3554	10.3456	-2.22914	0.0160922	-1.14561	0.0455969
CNAG_06150	hsp90-like protein (3051 nt)	9.74345	9.77582	9.58797	8.6056	8.67526	8.37029	10.483	10.5258	10.3736	-2.22226	0.00854827	1.6916	0.0418661
CNAG_03005	cytoplasmic tRNA 2-thiolation protein 2 (2150 nt)	5.31834	5.19042	5.2247	4.28048	4.07666	3.92278	5.27959	5.35779	5.19409	-2.22095	0.0157343	1.02291	0.738651
CNAG_01756	mitochondrial import inner membrane translocase subunit TIM22 (1159 nt)	6.51212	6.59277	6.5314	5.45988	5.50208	5.22416	6.47615	6.65957	6.53486	-2.21923	0.0146813	1.00795	0.910902
CNAG_00815	MFS transporter, SIT family, siderophore-iron:H symporter (2948 nt)	3.64364	4.23421	4.07172	2.76089	2.95402	2.78539	3.68574	3.98944	3.76885	-2.21877	0.0356408	-1.1239	0.601669
CNAG_04899	cytoplasmic protein (1697 nt)	5.87196	5.96783	6.06291	4.87988	4.85216	4.72297	5.51937	5.70604	5.7178	-2.21796	0.00474305	-1.24819	0.109025
CNAG_04053	hypothetical protein (2115 nt)	4.71028	4.91642	4.8524	3.7705	3.76249	3.50834	4.06073	4.36133	4.43189	-2.21288	0.00733835	-1.4557	0.114716
CNAG_07864	U3 small nucleolar ribonucleoprotein IMP3 (1087 nt)	7.1833	7.29291	7.24235	6.14198	6.21557	5.92686	7.19078	7.3477	7.23474	-2.21102	0.01262	1.01271	0.848432
CNAG_05763	hypothetical protein (1633 nt)	4.30391	4.40639	3.97445	3.11173	3.05906	3.08945	3.00651	3.30064	2.9876	-2.20611	0.0311906	-2.18859	0.0606009
CNAG_01681	cytosine permease (3144 nt)	6.35729	6.32414	6.23791	5.12923	5.06359	5.30213	6.41826	6.44282	6.42037	-2.20605	0.00768379	1.08726	0.193374
CNAG_07609	ATP-dependent RNA helicase DDX51/DBP6 (2702 nt)	5.36703	5.52688	5.30335	4.29075	4.41465	4.08519	5.23783	5.15094	4.98593	-2.19703	0.00867889	-1.20931	0.163504
CNAG_02894	hypothetical protein (1335 nt)	5.17736	5.17736	5.07142	3.85549	4.33806	3.83144	5.04971	5.07993	4.8658	-2.19423	0.039235	-1.10463	0.297642
CNAG_06756	pre-rRNA-processing protein ESF2 (1286 nt)	6.26085	6.2711	6.36919	5.29545	5.15482	5.05567	6.08606	6.20295	6.13571	-2.19122	0.00763411	-1.11636	0.127743
CNAG_01623	tRNA pseudouridine(55) synthase (1981 nt)	5.03519	5.04046	5.10179	3.9543	4.07963	3.75086	4.99437	5.10344	5.07142	-2.18993	0.0187202	-1.0019	0.967321
CNAG_00607	hypothetical protein (1921 nt)	5.93815	5.98284	5.99599	4.69534	4.963	4.86666	5.46387	5.74804	5.93815	-2.18958	0.0146813	-1.19387	0.353408
CNAG_04068	large subunit ribosomal protein L28e (1452 nt)	10.7141	10.7539	10.7258	9.57735	9.7938	9.43277	10.6448	10.5546	10.5693	-2.18852	0.0238295	-1.10321	0.114168
CNAG_00021	S-adenosylmethionine decarboxylase proenzyme (2054 nt)	6.45366	6.50865	6.36084	5.29124	5.47621	5.1667	6.12482	6.23883	5.91151	-2.18808	0.0108828	-1.27397	0.162135
CNAG_02220	hypothetical protein (4406 nt)	4.35507	4.49526	4.30029	3.26015	3.3074	3.19447	4.74796	4.84843	4.71233	-2.18788	0.00573553	1.30679	0.0777402
CNAG_03577	large subunit ribosomal protein LP0 (2829 nt)	10.0405	10.1226	10.1376	8.98559	9.09626	8.83044	9.86952	9.91767	9.80937	-2.18776	0.0107068	-1.17666	0.0713701
CNAG_01729	ATP-dependent RNA helicase DHX37/DHR1 (4491 nt)	4.12906	4.46718	4.11474	2.93886	3.12456	3.25936	3.89329	3.95132	3.81984	-2.18768	0.0110771	-1.27354	0.210221
CNAG_03215	hypothetical protein (2492 nt)	3.42695	3.43561	3.40953	2.26978	2.25992	2.35462	3.04484	3.03935	3.30142	-2.18746	0.00581184	-1.2273	0.199247
CNAG_05371	hypothetical protein (2791 nt)	4.56034	4.65083	4.80183	3.48542	3.68935	3.4589	4.30029	4.36639	4.42188	-2.18319	0.00588588	-1.23811	0.128367
CNAG_03944	chaperone regulator (2158 nt)	8.52835	8.67991	8.44166	7.46407	7.60427	7.20822	8.96857	8.97304	8.74682	-2.18019	0.0128401	1.27118	0.122317
CNAG_06350	hypothetical protein (1974 nt)	5.7662	5.9284	5.83296	4.64695	4.81781	4.68985	5.80075	5.78895	5.87564	-2.17998	0.00450525	-1.01448	0.820927
CNAG_01791	ribosome production factor 1 (2077 nt)	6.2845	6.33162	6.16362	5.1799	5.14781	5.08738	6.56093	6.65388	6.53356	-2.17581	0.00573553	1.25082	0.0785085
CNAG_06033	pfkB family carbohydrate kinase superfamily (2825 nt)	4.63395	4.80998	4.69862	3.45637	3.78774	3.54209	4.60369	4.67103	4.68028	-2.17164	0.0116524	-1.04429	0.510098
CNAG_07439	U3 small nucleolar RNA-associated protein 21 (3566 nt)	5.75129	5.92146	5.74428	4.68281	4.66431	4.72608	5.71198	5.68067	5.59737	-2.16537	0.00919564	-1.10369	0.257309
CNAG_04712	solute carrier family 25 (mitochondrial dicarboxylate transporter), member 10 (2005 nt)	6.157	6.28819	6.13734	5.1156	5.13553	4.99306	5.81188	5.86077	5.78895	-2.16262	0.00448812	-1.29562	0.0763923
CNAG_04287	mitochondrial import inner membrane translocase subunit (1425 nt)	7.30649	7.40999	7.25624	6.30472	6.19732	6.13298	7.10011	7.15283	7.01794	-2.16231	0.00448812	-1.17605	0.104661
CNAG_04729	ATP-dependent RNA helicase DBP7 (3100 nt)	5.56473	5.69427	5.6161	4.54802	4.56098	4.43101	5.16007	5.20232	5.25782	-2.161	0.00422177	-1.33635	0.0486395
CNAG_01264	homoisocitrate dehydrogenase (1648 nt)	8.67526	8.79976	8.72561	7.70238	7.71061	7.45806	8.48589	8.61572	8.36585	-2.15824	0.0108978	-1.18459	0.172849
CNAG_01400	3-deoxy-7-phosphoheptulonate synthase (1710 nt)	8.72028	8.76371	8.59943	7.63036	7.76327	7.36515	8.62386	8.67041	8.59943	-2.15579	0.0178178	-1.04481	0.486356
CNAG_05597	transcription initiation factor TFIID subunit 9/adenylate kinase (995 nt)	6.99934	7.23474	7.19943	6.04934	6.05499	6.00791	6.85632	6.98873	6.97082	-2.15411	0.0143734	-1.15339	0.218458
CNAG_07572	elongator complex protein 3 (2278 nt)	5.62662	5.59999	5.55234	4.42884	4.40816	4.62456	5.54486	5.53668	5.5307	-2.15218	0.0111578	-1.03927	0.259749
CNAG_02583	tRNA (guanine10-N2)-methyltransferase (2125 nt)	5.75743	5.87413	5.86686	4.81487	4.75923	4.60913	5.46121	5.61906	5.52459	-2.15108	0.00573553	-1.22931	0.0783908
CNAG_02867	phosphatidylinositol phospholipase C, delta (3319 nt)	5.24299	5.43783	4.92804	4.18002	4.0571	4.0578	5.2478	5.24467	5.04813	-2.15046	0.0324659	-1.0159	0.93616
CNAG_06641	DNA-directed RNA polymerase III subunit RPC6 (2071 nt)	6.01559	6.1391	6.18664	4.91428	5.1156	5.00026	5.36775	5.61865	5.55853	-2.1491	0.00510286	-1.51446	0.0666994
CNAG_00455	ubiquitin carboxyl-terminal hydrolase Ubp16 (2458 nt)	5.15275	5.12438	4.96916	3.94841	4.03438	3.95753	5.00979	4.81781	4.66377	-2.1465	0.00671261	-1.19056	0.250837
CNAG_04136	methylthioribose-1-phosphate isomerase (4456 nt)	5.27907	5.44159	5.40566	4.31574	4.3567	4.15326	5.25393	5.3628	5.07349	-2.14386	0.00549219	-1.10601	0.380582
CNAG_03159	cytoplasmic protein (1004 nt)	8.07792	8.03943	8.11818	7.03924	6.97082	6.94115	7.933	8.06124	7.97968	-2.13579	0.00422177	-1.06231	0.274785
CNAG_05936	DNA-directed RNA polymerase III subunit RPC1 (5501 nt)	4.95485	5.09165	4.99366	3.84251	3.94345	3.97087	4.90148	5.02574	4.84609	-2.13531	0.00422177	-1.0636	0.414839
CNAG_03521	DNA-directed RNA polymerase III subunit RPC10 (797 nt)	5.82137	5.88378	5.41978	4.72207	4.75143	4.36858	5.82401	6.02953	6.00791	-2.13507	0.0180802	1.18551	0.381394
CNAG_03636	DNA-directed RNA polymerase I and III subunit RPAC2 (832 nt)	7.89747	7.93099	8.02128	6.87162	6.86236	6.83481	7.75609	7.93099	7.77337	-2.13413	0.00648095	-1.09411	0.277754
CNAG_04292	hypothetical protein (1660 nt)	7.43704	7.46258	7.36515	6.40037	6.36719	6.21676	7.31313	7.31834	7.11934	-2.13388	0.00615752	-1.12609	0.239928
CNAG_00786	hypothetical protein (1042 nt)	6.63297	6.64108	6.58256	5.72142	5.5007	5.36083	6.52297	6.40821	6.69393	-2.13054	0.0234399	-1.05495	0.597259
CNAG_03961	hypothetical protein (1638 nt)	6.77666	6.81321	6.65102	5.72038	5.774	5.4779	6.91107	6.96241	6.8399	-2.12805	0.0104424	1.11535	0.186621
CNAG_01397	mitochondrial import inner membrane translocase subunit (1373 nt)	8.18745	8.27456	8.20995	7.19078	7.19078	7.02762	7.96934	7.90755	7.9191	-2.12519	0.00644608	-1.22433	0.0486395
CNAG_04513	DNA-directed RNA polymerase III subunit RPC2 (4138 nt)	5.35944	5.39173	5.29977	4.23886	4.32595	4.2248	5.21941	5.26757	5.27842	-2.12448	0.00422177	-1.0682	0.162135
CNAG_02386	hypothetical protein (1170 nt)	5.42629	5.61012	5.6018	4.35995	4.5004	4.51675	5.25447	5.19141	5.16468	-2.12438	0.00532463	-1.268	0.100552
CNAG_02875	hypothetical protein (1906 nt)	5.50827	5.58506	5.7615	4.46259	4.44176	4.69053	5.38186	5.42629	5.41845	-2.1238	0.0069255	-1.15622	0.238902
CNAG_03098	hypothetical protein (6180 nt)	4.85651	4.82349	4.91642	3.79378	3.87276	3.67252	4.59795	4.6278	4.47338	-2.12253	0.00709304	-1.23037	0.0834994
CNAG_04523	glyceraldehyde-3-phosphate dehydrogenase, type I (1832 nt)	1.35879	1.53965	1.85575	0.3635	0.577098	0.557543	1.68656	1.49056	1.93009	-2.12189	0.0237252	1.08498	0.702059
CNAG_00608	hypothetical protein (940 nt)	7.62285	7.74471	7.71232	6.66664	6.64748	6.50979	7.48802	7.50961	7.46592	-2.12185	0.00474305	-1.15304	0.109738
CNAG_01428	eukaryotic translation initiation factor 5A (3830 nt)	9.31082	9.41106	9.19355	8.35357	8.23605	8.0757	9.42485	9.23306	9.08149	-2.11898	0.00695277	-1.04151	0.760668
CNAG_03246	18S rRNA biogenesis protein RCL1 (1598 nt)	6.10996	6.05172	5.73482	4.82277	5.05998	4.76373	5.94913	5.84842	5.77318	-2.11894	0.012087	-1.07817	0.605318
CNAG_07381	ATP-dependent RNA helicase prh1 (3094 nt)	5.20402	4.96824	5.03203	3.97984	4.08485	3.8918	4.7294	5.01782	4.97584	-2.11785	0.00582856	-1.11761	0.391169
CNAG_00822	ribosome assembly protein SQT1 (1779 nt)	7.50961	7.48639	7.48802	6.36467	6.57046	6.30312	7.46258	7.41251	7.24828	-2.11686	0.0186915	-1.0869	0.353393
CNAG_01416	hypothetical protein (1344 nt)	6.69023	6.76286	6.77237	5.67793	5.73347	5.56862	6.33954	6.5842	6.41098	-2.11669	0.00573553	-1.22851	0.148337
CNAG_07953	hypothetical protein (1214 nt)	6.07533	6.35657	6.05499	5.33372	5.01688	4.90979	5.84029	6.01927	5.79315	-2.10745	0.0143617	-1.21257	0.217834
CNAG_07535	small subunit ribosomal protein S16 (1603 nt)	5.76484	5.86128	5.95529	4.9041	4.72563	4.72785	5.61689	5.70019	5.51089	-2.10615	0.00532463	-1.19015	0.130426
CNAG_05270	tRNA pseudouridine13 synthase (2999 nt)	5.05726	5.1698	5.27397	4.03268	4.11085	4.13627	5.30695	5.33708	5.17884	-2.10488	0.00725621	1.07719	0.406357
CNAG_07672	hypothetical protein (2883 nt)	4.6489	4.73591	4.73106	3.54378	3.7645	3.58691	4.5666	4.73217	4.4183	-2.10462	0.0091909	-1.09652	0.433167
CNAG_05151	U3 small nucleolar RNA-associated protein 11 (1325 nt)	6.17264	6.34753	6.07282	5.2226	5.04813	5.1024	5.97042	6.17411	6.15139	-2.10423	0.00768379	-1.07105	0.544404
CNAG_07884	hypothetical protein (1401 nt)	9.17464	9.19802	9.11032	8.05703	8.22248	7.98481	8.93408	8.94515	8.91423	-2.10364	0.0105595	-1.17271	0.0765873
CNAG_05980	large subunit ribosomal protein L7/L12 (2131 nt)	8.14343	8.33011	8.22864	7.3154	7.15646	7.01622	7.98833	7.97464	7.8809	-2.10142	0.00870766	-1.21934	0.0991728
CNAG_07951	WD-repeat protein JIP5 (1680 nt)	6.19584	6.26085	6.24995	5.13921	5.15917	5.19458	5.97422	6.21105	6.1888	-2.10122	0.00268496	-1.07987	0.432973
CNAG_01300	small subunit ribosomal protein S21e (3148 nt)	10.5006	10.5006	10.5006	9.48673	9.52395	9.28053	10.2456	10.3098	10.3554	-2.09969	0.0181611	-1.1463	0.116953
CNAG_00116	small subunit ribosomal protein S3 (1806 nt)	10.6068	10.6175	10.6321	9.62328	9.59857	9.44104	10.6175	10.3456	10.3098	-2.09145	0.0126382	-1.14433	0.330884
CNAG_04334	hypothetical protein (1392 nt)	7.63159	7.62693	7.39157	6.5314	6.63881	6.28962	7.46592	7.34846	7.24586	-2.08988	0.0103229	-1.14601	0.269961
CNAG_00846	hypothetical protein (1736 nt)	4.92468	5.03429	4.92715	3.82624	4.05002	3.82963	4.54938	5.08389	4.79773	-2.08504	0.00897339	-1.11088	0.578605
CNAG_02810	pumilio-family RNA binding protein (4091 nt)	6.67535	6.68031	6.64108	5.50429	5.72491	5.58921	6.53356	6.60624	6.51797	-2.08413	0.0132502	-1.08147	0.137347
CNAG_01437	ribosomal RNA assembly protein (1516 nt)	7.16383	7.29928	7.34626	6.11309	6.29989	6.2185	6.8022	6.92141	6.84649	-2.08392	0.00512415	-1.33153	0.0702074
CNAG_07966	hypothetical protein (895 nt)	5.30432	5.38783	5.08628	4.03759	4.09717	4.46765	5.4464	5.72934	5.29124	-2.08302	0.0171869	1.17244	0.377425
CNAG_07702	hypothetical protein (1690 nt)	3.61917	3.65597	3.17992	2.51973	2.45242	2.32403	3.61158	3.38941	3.0046	-2.07478	0.0314558	-1.10943	0.686616
CNAG_00334	hsp75-like protein (2882 nt)	10.6321	10.6556	10.6068	9.53338	9.85068	9.3536	10.772	10.7464	10.6962	-2.07379	0.0404987	1.07676	0.111153
CNAG_01098	pre-rRNA-processing protein IPI1 (2660 nt)	5.42921	5.56356	5.52688	4.39803	4.50841	4.45664	5.26952	5.4389	5.44987	-2.07367	0.00422177	-1.08707	0.321239
CNAG_00643	hypothetical protein (3059 nt)	4.27121	4.34058	4.47113	3.32521	3.34167	3.26015	4.16488	4.16437	4.23996	-2.07335	0.00783832	-1.12602	0.212176
CNAG_03822	monolysocardiolipin acyltransferase (1605 nt)	5.69219	5.90752	5.6382	4.71915	4.82623	4.54548	5.60541	5.54751	5.64786	-2.06911	0.0077565	-1.10627	0.363293
CNAG_06029	peptidyl-tRNA hydrolase ICT1 (863 nt)	5.53282	5.67193	5.62735	4.70625	4.44726	4.53343	5.32716	5.19645	5.11361	-2.06821	0.00860106	-1.31794	0.0805303
CNAG_04817	hypothetical protein (1329 nt)	6.53783	6.5734	6.65032	5.57564	5.75476	5.28654	6.73531	6.79576	6.82426	-2.06795	0.0323646	1.14705	0.0853198
CNAG_01680	3-methylcrotonyl-CoA carboxylase alpha subunit (3161 nt)	4.91091	4.89437	5.00026	3.99931	3.82242	3.84194	4.68985	4.58969	4.53095	-2.06665	0.00573553	-1.25848	0.0720602
CNAG_02842	hypothetical protein (1171 nt)	8.11818	8.10635	8.12106	7.07246	7.17046	6.97082	7.76866	7.99357	8.00211	-2.06187	0.0135553	-1.14373	0.268007
CNAG_00930	argininosuccinate synthase (2442 nt)	9.15288	9.18895	9.10308	8.15815	8.27841	7.88559	9.24665	9.34073	9.10308	-2.05754	0.0271809	1.05837	0.514477
CNAG_03354	hypothetical protein (1563 nt)	5.17325	5.22048	5.2274	4.26318	4.15596	4.08352	4.97221	4.96469	4.99237	-2.0555	0.00863618	-1.17334	0.0502839
CNAG_00358	tRNA dimethylallyltransferase (3094 nt)	4.64695	4.52245	4.64417	3.69341	3.63564	3.37014	4.50515	4.5528	4.36639	-2.05356	0.0157864	-1.0941	0.28444
CNAG_08014	hypothetical protein (744 nt)	3.90964	4.06514	3.90598	2.80412	2.79007	3.17575	4.2688	4.0886	3.59409	-2.05187	0.0222984	1.01648	0.94796
CNAG_00417	elongation factor 1-gamma (2130 nt)	10.1034	10.1376	10.1991	9.16472	9.21829	8.95018	10.0139	9.97589	9.8791	-2.05001	0.0139644	-1.14109	0.112007
CNAG_01202	hypothetical protein (1518 nt)	5.69427	5.76542	5.75878	4.69629	4.71915	4.69862	5.74804	5.72537	5.59469	-2.04883	0.00509163	-1.03535	0.564256
CNAG_05844	mitochondrial import inner membrane translocase subunit TIM8 (920 nt)	8.43697	8.59199	8.49907	7.56573	7.5082	7.3549	8.3838	8.43697	8.37903	-2.04637	0.00573553	-1.07879	0.261992
CNAG_03129	transcription factor iiia (1925 nt)	4.80894	5.07754	4.90979	3.86289	4.0673	3.7718	4.52039	4.71599	4.78754	-2.04405	0.00828799	-1.19537	0.21132
CNAG_05091	hypothetical protein (1148 nt)	7.66967	7.60427	7.73024	6.64279	6.79576	6.47366	7.28678	7.37129	7.38911	-2.04296	0.0150895	-1.24747	0.0606009
CNAG_06157	hypothetical protein (3385 nt)	4.10812	4.15736	3.85249	3.0734	3.11713	2.84183	4.24393	4.13452	4.07831	-2.03995	0.00957925	1.08142	0.520323
CNAG_03511	hypothetical protein (1299 nt)	7.59952	7.90141	7.96165	6.98018	6.69773	6.71031	7.77549	7.69396	7.6167	-2.03466	0.0123851	-1.09087	0.538003
CNAG_02191	hypothetical protein (911 nt)	6.57541	6.60422	6.52805	5.73832	5.41669	5.48342	6.22661	6.09564	6.1177	-2.03225	0.0217081	-1.34032	0.0580996
CNAG_02128	translation initiation factor 3 subunit J (1275 nt)	9.44922	9.51157	9.66281	8.54011	8.58041	8.43697	9.34073	9.51157	9.44104	-2.03078	0.00589103	-1.0793	0.402561
CNAG_01104	ribosomal RNA-processing protein 8 (1715 nt)	6.25494	6.32717	6.42246	5.28403	5.30382	5.3555	6.04263	6.10061	5.95028	-2.02848	0.00665484	-1.23429	0.0834994
CNAG_00821	large subunit ribosomal protein L34e (1566 nt)	10.8663	10.9615	10.8663	10.0236	9.86952	9.74345	10.8382	10.772	10.6068	-2.02681	0.012731	-1.11658	0.274879
CNAG_05086	hypothetical protein (917 nt)	6.31653	6.40742	6.51633	5.56541	5.35013	5.27142	5.88884	5.91385	6.07374	-2.0248	0.00931482	-1.37042	0.0688737
CNAG_05425	asparagine synthase (glutamine-hydrolyzing) (2386 nt)	8.90289	8.86404	8.74682	7.87456	7.96434	7.62285	8.58041	8.66745	8.43697	-2.02417	0.0154567	-1.21109	0.132414
CNAG_06231	large subunit ribosomal protein L13 (1830 nt)	11.2195	11.2977	11.0857	10.323	10.2864	9.94281	11.1498	11.0311	10.8663	-2.02352	0.0184586	-1.13696	0.295938
CNAG_02122	cytoplasmic tRNA 2-thiolation protein 1 (1784 nt)	5.44987	5.51621	5.57242	4.38251	4.66906	4.44639	5.09906	5.01615	5.06917	-2.01882	0.0135844	-1.36735	0.0445118
CNAG_02204	endonuclease G, mitochondrial (1549 nt)	6.5966	6.6143	6.59016	5.61012	5.75129	5.39912	6.68849	6.53486	6.55687	-2.01882	0.0272765	-1.00483	0.936379
CNAG_06729	hypothetical protein (685 nt)	6.80714	6.78274	6.62268	5.84488	5.72619	5.60815	6.68511	6.67953	6.52401	-2.01547	0.00596737	-1.07771	0.395633
CNAG_05239	cytoplasmic protein (865 nt)	6.72346	6.71031	6.67251	5.77811	5.63586	5.65994	6.48556	6.6694	6.58317	-2.01502	0.00731536	-1.08878	0.281058
CNAG_01049	H/ACA ribonucleoprotein complex subunit 3 (793 nt)	8.46425	8.58041	8.47176	7.61934	7.4454	7.42374	8.29816	8.42395	8.32432	-2.01295	0.0064546	-1.1147	0.149389
CNAG_03779	large subunit ribosomal protein L4 (2774 nt)	5.74179	5.86583	5.85915	4.81781	4.80998	4.81431	5.9621	5.73566	5.76086	-2.01143	0.0101556	-1.00188	0.984842
CNAG_01304	polynucleotide 5'-hydroxyl-kinase GRC3 (2884 nt)	5.13323	5.17678	5.21941	4.22943	4.20056	4.08248	5.15239	5.17228	5.1667	-2.00785	0.00559579	-1.00883	0.774444
CNAG_01885	DNA polymerase sigma subunit (2939 nt)	4.84373	4.85324	4.89889	3.77752	4.01829	3.79378	4.77532	4.79823	4.76979	-2.0029	0.0169461	-1.06008	0.112228
CNAG_03335	ribose-phosphate pyrophosphokinase (1856 nt)	7.32729	7.29798	7.19349	6.17668	6.41249	6.22349	6.98228	6.96734	6.88639	-2.00282	0.0082049	-1.25491	0.0655392
CNAG_06742	pre-60S factor REI1 (1665 nt)	6.83876	6.94292	6.93824	5.91984	5.94146	5.85341	6.80416	6.86916	6.93824	-2.00241	0.00422177	-1.02535	0.65609
CNAG_04909	serine carboxypeptidase-like 33 (4705 nt)	2.35462	2.54368	2.74663	1.71009	1.64796	1.28579	2.06619	1.81039	1.94093	-2.0005	0.0179722	-1.52535	0.0968005
CNAG_04086	hypothetical protein (2382 nt)	3.16355	3.38941	3.08564	2.36917	2.18932	2.12225	2.18786	2.19616	2.18786	-1.98062	0.00952685	-2.03107	0.0783908
CNAG_06517	cytoplasmic protein (5066 nt)	3.97314	4.06262	4.15016	3.16876	3.22634	2.91319	3.02101	3.02564	2.95402	-1.94425	0.0135971	-2.08746	0.0418661
CNAG_04313	NADPH2 dehydrogenase (1759 nt)	5.78751	5.82489	5.774	4.93806	4.83538	4.85444	7.161	7.22012	7.32521	-1.89147	0.00510286	2.71317	0.0418661
CNAG_00813	hypothetical protein (2544 nt)	0.379844	0.58231	0.468692	0.130038	0.0790546	0.0361346	3.8569	3.62179	3.55594	-1.31513	0.0286366	9.19764	0.0202358
CNAG_06642	Atypical/PIKK/FRAP protein kinase (8763 nt)	4.38659	4.43031	4.36982	4.49862	4.47858	4.5528	8.0739	8.01731	7.96434	1.08254	0.0399059	12.3201	0.00791723
CNAG_06290	high-affinity glucose transporter SNF3 (3749 nt)	2.6316	2.4819	2.623	3.36717	3.16355	3.39288	3.92278	3.60648	4.09596	1.65753	0.0112973	2.45588	0.075527
CNAG_00164	hypothetical protein (2102 nt)	3.73806	3.64455	3.57703	4.29533	4.29983	4.55229	4.78627	4.66551	4.91942	1.6578	0.016798	2.19952	0.0418661
CNAG_06404	hypothetical protein (831 nt)	8.18143	8.1501	8.16484	8.89989	8.93995	9.11439	7.10252	6.99639	7.33687	1.76453	0.0194837	-2.0282	0.0820856
CNAG_01095	BEM46 family protein (1871 nt)	4.69771	4.56554	4.49862	5.56791	5.70429	5.49271	4.68584	4.99689	4.80406	2.0014	0.00573553	1.18233	0.234402
CNAG_04265	hypothetical protein (2860 nt)	6.12331	6.064	6.42037	7.11352	7.11475	7.38277	5.95381	6.10644	6.18106	2.00156	0.0125962	-1.08833	0.557229
CNAG_05665	hypothetical protein (3341 nt)	4.9713	4.99001	5.04885	5.91055	5.94851	6.15575	4.92383	4.93245	5.14169	2.00215	0.0142086	-1.00282	0.976411
CNAG_02360	hypothetical protein (1704 nt)	5.85851	5.75527	5.79432	6.78948	6.7647	6.85878	5.5405	5.37691	5.14662	2.00225	0.00422177	-1.36417	0.163336
CNAG_01262	guanine nucleotide-binding protein subunit beta (1484 nt)	4.71233	4.72994	4.91488	5.76757	5.62183	5.9729	5.16396	5.05842	5.01033	2.00238	0.012042	1.22421	0.117395
CNAG_01924	hypothetical protein (1208 nt)	5.94557	5.97611	5.96783	6.96837	6.89452	7.04079	5.75476	5.42921	5.38253	2.00656	0.00889323	-1.35755	0.181185
CNAG_04944	hypothetical protein (2835 nt)	4.25842	4.56734	4.60139	5.40087	5.32447	5.71902	4.60837	4.47458	4.65234	2.00797	0.0152432	1.07379	0.605512
CNAG_01078	aldehyde dehydrogenase (NAD ) (2211 nt)	4.91562	4.89151	4.91767	5.94234	5.80979	5.99102	4.93572	4.93088	5.13757	2.0085	0.0122563	1.06668	0.460979
CNAG_03069	hydrolase (1187 nt)	7.25906	7.22474	7.40342	8.29816	8.19828	8.41202	7.0851	6.89921	7.14018	2.00985	0.00573553	-1.19271	0.166806
CNAG_03995	hypothetical protein (917 nt)	5.90171	6.04595	6.25992	7.12503	6.78274	7.32337	6.03864	5.78601	5.9621	2.01092	0.0256611	-1.10212	0.496544
CNAG_03631	hypothetical protein (1356 nt)	6.50408	6.49249	6.77788	7.55016	7.49388	7.75837	6.21341	6.16478	6.61937	2.01296	0.00956448	-1.19662	0.370362
CNAG_03385	g1/s-specific cyclin pcl1 (2046 nt)	5.30025	5.22416	5.24003	6.15335	6.05734	6.58811	5.41166	5.29495	5.55578	2.01595	0.0491226	1.12193	0.293576
CNAG_04746	hypothetical protein (2074 nt)	6.10313	6.12246	6.31393	7.1119	7.19218	7.27645	5.96016	6.00215	6.33954	2.01904	0.00625034	-1.05645	0.726214
CNAG_03475	hypothetical protein (3235 nt)	4.51567	4.38296	4.56554	5.51837	5.37871	5.61865	4.50561	4.29902	4.56098	2.02397	0.00615752	-1.02303	0.83926
CNAG_03865	cytoplasmic protein (1712 nt)	5.64933	5.48285	5.37239	6.56898	6.28523	6.70925	5.39218	5.19782	5.26077	2.02739	0.0164923	-1.16307	0.233305
CNAG_00371	methylglutaconyl-CoA hydratase (1347 nt)	4.28387	4.40888	4.7329	5.41669	5.39359	5.67766	4.37762	4.30305	4.29075	2.02899	0.0179722	-1.11066	0.528863
CNAG_04470	haloacid dehalogenase, type II (1190 nt)	3.94573	3.90282	4.2971	5.2065	5.02247	4.99462	4.17132	3.58416	3.63518	2.03634	0.0185171	-1.19058	0.492003
CNAG_01995	hypothetical protein (1233 nt)	0.544412	0.991638	1.20204	1.88849	1.8333	2.09462	0.818477	0.654251	1.07723	2.03652	0.0465006	-1.04443	0.871903
CNAG_06614	glycerophosphodiesterase (2645 nt)	4.51675	4.11668	4.32374	5.30123	5.11505	5.62043	4.77802	4.82574	4.84745	2.0371	0.0209232	1.41227	0.154173
CNAG_02942	hypothetical protein (1881 nt)	4.90335	5.01176	4.7463	5.84029	5.98449	5.9181	4.97928	5.05998	5.17228	2.038	0.0089446	1.13554	0.275758
CNAG_00691	hypothetical protein (2193 nt)	4.69689	4.79075	5.00267	5.87267	5.79684	5.90401	5.01089	5.03894	4.91642	2.03882	0.0157617	1.11624	0.367236
CNAG_01691	hypothetical protein (1994 nt)	5.00188	4.94763	4.67803	5.86763	5.88838	5.95736	4.8213	4.7329	4.98279	2.04006	0.0206515	-1.02114	0.885609
CNAG_05544	hypothetical protein (921 nt)	3.95539	4.19391	4.38949	5.29784	5.05067	5.27702	3.89277	4.15736	4.15251	2.04049	0.016549	-1.08076	0.645255
CNAG_06313	phosphoglucomutase (3701 nt)	8.10635	8.1471	8.16742	9.14726	9.19355	9.17464	8.17268	8.13346	8.20297	2.04419	0.00268496	1.0206	0.4935
CNAG_01560	hypothetical protein (2357 nt)	1.4208	1.30723	1.20562	2.39285	2.03688	2.61236	0.779157	1.24267	1.01267	2.05074	0.0375764	-1.2309	0.284038
CNAG_06459	vacuolar membrane protein (3788 nt)	3.57827	3.50597	3.68291	4.59706	4.50684	4.77321	3.5573	3.61475	3.60707	2.05146	0.00765683	1.00277	0.966835
CNAG_03858	hypothetical protein (1618 nt)	7.06937	7.05332	7.1742	8.0757	8.15346	8.18745	7.3154	7.32976	7.45806	2.05609	0.00422177	1.20479	0.0865318
CNAG_00275	hypothetical protein (2504 nt)	5.39598	4.96602	4.99306	6.28523	5.9688	6.22661	4.92049	4.87204	4.71645	2.05888	0.0184799	-1.2159	0.316343
CNAG_02935	malonic semialdehyde reductase (2239 nt)	5.21995	5.17066	5.19498	6.22912	6.24163	6.24692	4.52331	4.17525	4.35507	2.06198	0.00422177	-1.795	0.0897277
CNAG_02439	hypothetical protein (1889 nt)	3.66362	3.78774	3.86004	4.76219	4.8599	4.82665	3.84714	3.72562	3.88821	2.06448	0.00674854	1.03516	0.676346
CNAG_05643	DNA polymerase delta subunit 4 (1534 nt)	4.63803	4.79773	4.56993	5.66249	5.829	5.65162	3.82532	3.81769	4.24093	2.06452	0.00573553	-1.63269	0.111222
CNAG_02069	hypothetical protein (1624 nt)	4.98939	5.00563	4.80573	5.95643	6.07533	5.91055	4.96667	5.05125	5.15239	2.0665	0.00573553	1.08914	0.369441
CNAG_03243	2-nitropropane dioxygenase (1943 nt)	3.67252	3.65486	4.06028	4.91562	4.61563	5.01342	3.47281	3.62814	3.77277	2.07389	0.0167505	-1.12608	0.503451
CNAG_04388	Fe-Mn family superoxide dismutase (1208 nt)	9.21224	9.11439	9.26739	10.2668	10.1376	10.3554	8.98559	8.88806	9.03975	2.07807	0.00573553	-1.17029	0.113246
CNAG_02165	cytoplasmic protein (3662 nt)	3.82963	3.54101	3.84251	4.71556	4.80741	4.85934	3.69198	3.59313	3.50834	2.07972	0.0146813	-1.10183	0.454891
CNAG_02030	glyoxal oxidase (4480 nt)	6.54293	6.52805	6.36614	7.44956	7.63036	7.5296	6.70614	6.59534	6.49046	2.08128	0.00524526	1.08543	0.387295
CNAG_01384	hypothetical protein (3634 nt)	1.37825	1.15351	1.14854	2.22151	2.29468	2.35012	1.77726	1.74426	1.40634	2.08783	0.00925295	1.33409	0.163111
CNAG_05639	hypothetical protein (4559 nt)	2.99676	3.18528	3.13529	4.00796	4.15251	4.34348	3.49702	3.48471	3.47381	2.08813	0.0110771	1.3008	0.108783
CNAG_00456	hypothetical protein (2381 nt)	6.20645	6.17668	6.37461	7.25756	7.27476	7.4271	6.77003	6.89452	6.86774	2.0954	0.0055622	1.50683	0.0589594
CNAG_05411	endoglucanase (2270 nt)	4.53449	4.38523	4.50338	5.58742	5.60629	5.43361	4.73106	4.55839	4.67182	2.09663	0.00495046	1.1324	0.174052
CNAG_06638	malate dehydrogenase (oxaloacetate-decarboxylating) (3318 nt)	7.14865	7.10423	7.15818	8.18745	8.33198	8.10206	7.44956	7.50349	7.37919	2.09965	0.0126382	1.23719	0.0710714
CNAG_02994	hypothetical protein (3239 nt)	6.91578	6.75966	6.8022	7.84446	7.90141	7.96434	6.88811	6.89261	6.90311	2.1104	0.00450525	1.04879	0.433352
CNAG_06515	hypothetical protein (1544 nt)	4.16573	4.15326	4.21618	5.20699	5.02046	5.5423	3.66309	3.78116	3.92906	2.11139	0.0410514	-1.30793	0.128915
CNAG_03785	alpha,alpha-trehalase (4219 nt)	5.05567	5.13831	5.15917	6.13383	6.03599	6.41961	5.3623	5.18162	5.32825	2.11222	0.023282	1.12741	0.190438
CNAG_07559	glucose-6-phosphate 1-epimerase (1509 nt)	7.20183	7.10252	7.32521	8.32635	8.10989	8.43191	7.06083	6.98103	7.02762	2.11335	0.00935509	-1.13815	0.21847
CNAG_05292	alpha,alpha-trehalose-phosphate synthase (UDP-forming) (2855 nt)	7.07512	6.98289	7.11475	7.98833	8.03155	8.39268	7.20822	7.2532	7.47782	2.11393	0.0258204	1.19374	0.198382
CNAG_00587	hypothetical protein (1716 nt)	1.94808	1.9177	1.65447	3.18623	2.93307	2.64493	2.85559	2.59046	2.43347	2.11598	0.023071	1.72479	0.0794532
CNAG_00537	carnitine O-acetyltransferase (2520 nt)	3.74831	3.62249	4.01337	4.89029	4.7743	4.97221	3.66362	3.65087	4.02989	2.12021	0.0157476	-1.00924	0.963021
CNAG_00524	acetyl-CoA acyltransferase 2 (1956 nt)	4.97658	5.12066	5.00443	6.15189	5.89699	6.30695	5.014	4.88293	4.96548	2.12097	0.020678	-1.05684	0.4007
CNAG_02312	patatin-like phospholipase domain-containing protein (3568 nt)	3.7928	3.62814	3.5562	4.68876	4.69862	4.84556	3.77526	3.5623	3.57933	2.12177	0.00589103	-1.01402	0.902232
CNAG_00717	hypothetical protein (1926 nt)	3.99311	3.86548	3.74831	5.14781	4.67291	5.04353	4.24202	3.93482	4.03113	2.12253	0.0226642	1.14898	0.307103
CNAG_07965	hypothetical protein (4653 nt)	6.24163	6.41961	6.32542	7.47343	7.27645	7.49666	6.32894	6.34651	6.31316	2.12377	0.00588588	1.00045	0.993593
CNAG_03728	hypothetical protein (977 nt)	4.29402	4.12159	4.04814	5.5455	5.01033	5.16905	3.65486	3.55835	3.61917	2.12439	0.0279796	-1.4578	0.0827936
CNAG_03627	peptidyl-prolyl cis-trans isomerase (951 nt)	11.0311	11.0311	11.0311	12.1205	11.9576	12.2775	11.4045	11.3601	11.4267	2.12495	0.0224179	1.28877	0.0606009
CNAG_03937	hypothetical protein (919 nt)	6.97432	6.84824	7.00796	7.95846	7.85664	8.281	6.37461	6.45057	6.71305	2.12657	0.0224179	-1.34795	0.134314
CNAG_03463	hypothetical protein (3086 nt)	5.71256	5.69276	5.77111	6.79325	6.77917	6.88437	5.74597	5.64689	5.72491	2.13384	0.00422177	-1.01365	0.752236
CNAG_02568	UBA/TS-N domain-containing protein (5293 nt)	4.83313	4.75381	4.82349	5.86518	5.79731	6.02953	4.68483	4.51308	4.60369	2.13445	0.0103229	-1.15105	0.136966
CNAG_02298	niemann-Pick C1 protein (4523 nt)	4.33925	4.2762	4.42188	5.32825	5.28189	5.72537	4.05002	4.28212	4.28048	2.14265	0.0292038	-1.10311	0.353001
CNAG_02351	hypothetical protein (3339 nt)	4.5666	4.23174	4.26633	5.34024	5.35622	5.66924	4.63041	4.40432	4.44176	2.14406	0.0110771	1.09983	0.504828
CNAG_05293	glycogenin glucosyltransferase (3856 nt)	3.57933	3.55594	3.77111	4.62285	4.75329	4.83136	3.41328	3.344	3.27972	2.14411	0.00573553	-1.22247	0.1295
CNAG_05871	hypothetical protein (1072 nt)	5.63735	5.57954	5.56742	6.69917	6.58557	6.80078	5.29195	5.22888	5.20273	2.14415	0.00952685	-1.27773	0.0418661
CNAG_06498	hypothetical protein (3528 nt)	2.68072	2.56914	2.33028	3.63385	3.52185	3.7428	2.52898	2.72423	2.38848	2.15267	0.0109114	1.01433	0.932251
CNAG_00851	hypothetical protein (1189 nt)	4.74962	4.49553	4.9389	5.83244	5.70222	5.97422	4.29299	4.32164	4.35754	2.15588	0.0153993	-1.32314	0.214192
CNAG_06201	hypothetical protein (1858 nt)	4.97165	4.93604	4.52099	5.9248	5.9181	5.91151	4.33161	4.25255	4.51798	2.15633	0.0385535	-1.35865	0.196166
CNAG_04688	acyl-CoA dehydrogenase (2365 nt)	3.28911	3.28501	3.62332	4.4808	4.46324	4.60002	3.12914	2.87615	3.25936	2.16676	0.0177921	-1.24051	0.262257
CNAG_05652	cytoplasmic protein (2293 nt)	5.28245	5.16592	5.13392	6.19584	6.25565	6.47969	4.62185	4.64751	4.77948	2.16789	0.00970287	-1.42519	0.0519436
CNAG_07808	alanine-glyoxylate transaminase/serine-glyoxylate transaminase/serine-pyruvate transaminase (1834 nt)	6.38118	6.37461	6.52297	7.63159	7.42374	7.57267	6.12026	6.06082	5.99941	2.16808	0.00534274	-1.28885	0.0687672
CNAG_05003	hypothetical protein (2209 nt)	3.84846	3.5887	3.51735	4.7444	4.77122	4.80346	3.70372	3.44391	3.66969	2.17577	0.0215633	-1.03221	0.832683
CNAG_04589	hypothetical protein (2010 nt)	2.10021	2.38113	2.26978	3.62997	3.19375	3.3074	2.82594	2.35725	2.62065	2.18353	0.0151864	1.27536	0.241788
CNAG_04208	ataxin-3 (2273 nt)	5.32447	5.00336	5.11505	6.23883	6.25114	6.34431	4.84373	4.86623	4.81156	2.18929	0.0145388	-1.23724	0.205292
CNAG_05872	endopeptidase (2546 nt)	4.68483	4.57561	4.46422	5.67193	5.68779	5.75805	4.30608	4.60139	4.50756	2.19016	0.00810279	-1.07416	0.548685
CNAG_06880	mitochondrial protein (948 nt)	6.51895	6.56651	6.49249	7.64853	7.62136	7.71485	6.47778	6.45366	6.3261	2.19709	0.0035408	-1.07684	0.279813
CNAG_03266	malate dehydrogenase, NAD-dependent (1910 nt)	7.48432	7.38758	7.40999	8.59943	8.51212	8.58041	7.41707	7.01338	7.10252	2.19876	0.0035408	-1.18891	0.320667
CNAG_08005	hypothetical protein (670 nt)	3.70793	3.5182	3.32967	4.72522	4.42188	4.8213	4.08295	4.12616	4.48577	2.20005	0.0120154	1.63924	0.0942303
CNAG_01892	hypothetical protein (1232 nt)	6.59016	6.3859	6.50408	7.68091	7.38631	7.82654	6.27426	6.07588	6.29989	2.20056	0.0186915	-1.21142	0.147234
CNAG_04833	hypothetical protein (2346 nt)	3.54209	3.52441	3.55453	4.68985	4.66632	4.68951	3.55594	3.37729	3.25641	2.20618	0.000536589	-1.10481	0.39417
CNAG_02156	hypothetical protein (1656 nt)	4.3567	4.41055	4.29902	5.41978	5.55359	5.52724	4.0822	3.95642	3.56102	2.21112	0.00422177	-1.40335	0.212934
CNAG_04077	hypothetical protein (953 nt)	2.98371	3.25486	3.52441	4.57295	4.1306	4.51466	3.59659	3.59356	3.83086	2.22182	0.0191576	1.33732	0.230375
CNAG_01519	endonuclease/exonuclease/phosphatase (1522 nt)	4.40547	4.1989	4.33084	5.54751	5.28909	5.55749	3.52036	3.42176	3.8059	2.2237	0.00757111	-1.65756	0.0860632
CNAG_06064	hypothetical protein (1188 nt)	5.8527	5.74057	5.72537	6.95658	6.76552	7.07512	5.47897	5.31553	5.36648	2.23384	0.0111909	-1.30666	0.0658597
CNAG_06371	guanine deaminase (2786 nt)	4.34242	4.31272	4.45049	5.5405	5.34222	5.70222	3.719	3.71225	4.02253	2.23422	0.0146571	-1.46471	0.109738
CNAG_06216	hypothetical protein (1258 nt)	5.53898	5.50317	5.68067	6.71927	6.62474	6.8658	5.47404	5.61469	5.69219	2.23819	0.00573553	1.01351	0.891183
CNAG_01521	metallo-beta-lactamase (1780 nt)	4.29161	4.23377	4.5528	5.4445	5.42177	5.70604	3.8394	4.11521	3.84005	2.24188	0.00830804	-1.34522	0.132874
CNAG_01422	endoplasmic reticulum protein (3075 nt)	5.19707	5.10927	5.41895	6.35899	6.28378	6.57712	4.87757	4.9713	5.2478	2.24213	0.00763942	-1.15632	0.375355
CNAG_04256	hypothetical protein (2434 nt)	3.37629	3.39054	3.25376	4.57634	4.40143	4.55363	2.83122	2.98972	2.92499	2.25053	0.00474305	-1.34247	0.0589594
CNAG_04083	dolichol kinase (4108 nt)	3.97229	3.83452	3.87276	5.04606	4.92715	5.21995	3.97445	4.02867	4.01088	2.25198	0.00963292	1.08033	0.232502
CNAG_01745	glycerol-3-phosphate dehydrogenase (NAD( )) (2236 nt)	7.10011	7.02938	7.08866	8.19828	8.16248	8.37482	7.26276	7.28678	7.43456	2.25398	0.00963292	1.1936	0.122317
CNAG_04248	ubiquitin thioesterase OTUB1 (1366 nt)	4.90979	4.74493	4.88425	6.03817	5.85915	6.16699	4.78686	4.5666	4.36057	2.2581	0.00860106	-1.20998	0.285748
CNAG_02834	sterol 3-beta-glucosyltransferase (6205 nt)	2.87392	2.73902	2.875	3.92948	3.86046	4.22542	2.44444	2.48554	2.41524	2.25919	0.0159247	-1.30216	0.0720602
CNAG_06659	hexosaminidase (2558 nt)	3.81381	3.82648	3.8394	5.10885	4.81841	5.0907	3.94218	3.91057	3.80213	2.26486	0.0202607	1.04131	0.458574
CNAG_04566	beta-flanking protein (1872 nt)	7.74007	7.70238	7.68091	8.80396	8.92965	8.92965	8.27841	8.22621	8.33198	2.26572	0.00573553	1.48563	0.0411067
CNAG_05345	amino acid transporter (2675 nt)	1.4652	1.204	1.56222	2.52145	2.48554	2.76586	1.7072	1.6329	1.87646	2.26652	0.00910217	1.25561	0.195902
CNAG_06494	cold-induced thioredoxin domain-containing protein (2968 nt)	3.84905	3.72562	4.01893	4.97787	4.81113	5.34606	3.88171	3.97627	3.88273	2.26654	0.0215251	1.03457	0.747893
CNAG_00586	hypothetical protein (1103 nt)	3.90381	3.8329	3.34688	5.01782	4.73147	4.88155	3.90059	4.15928	4.27572	2.26957	0.0281398	1.33546	0.268475
CNAG_07826	hypothetical protein (528 nt)	2.33028	1.98985	2.27293	3.64831	3.07567	3.42176	1.97733	1.16933	2.82765	2.27241	0.0212444	-1.15369	0.810164
CNAG_05993	transmembrane transporter Liz1p (2983 nt)	4.13452	4.02135	3.62249	5.07808	5.17228	5.08443	3.64455	3.64609	3.65597	2.27439	0.0345336	-1.21188	0.368702
CNAG_05178	hypothetical protein (1901 nt)	1.58487	1.51844	1.90825	2.69116	2.76887	3.11713	1.8333	1.66516	2.00435	2.27921	0.0130274	1.1202	0.508114
CNAG_02585	hypothetical protein (2818 nt)	6.94896	6.9588	6.94183	8.20995	8.09759	8.11583	6.79988	6.68849	6.59958	2.28352	0.00733835	-1.19241	0.156659
CNAG_03213	UV damage endonuclease UvdE (2882 nt)	4.47295	3.93189	4.57054	5.48691	5.34459	5.72766	4.27859	4.31044	4.60293	2.2888	0.0312086	1.05131	0.850711
CNAG_05180	hypothetical protein (3212 nt)	2.35012	2.58267	2.74502	3.68574	3.59459	3.98149	2.48942	2.59875	2.66027	2.28892	0.0110544	1.01645	0.912584
CNAG_01375	hypothetical protein (3029 nt)	4.94795	4.86358	4.90148	6.12544	5.9621	6.21341	4.87141	4.41055	4.53536	2.291	0.0107252	-1.22992	0.304887
CNAG_00521	hypothetical protein (2440 nt)	4.6262	4.60369	4.71485	5.78182	5.74699	6.00913	4.56458	4.73591	4.45498	2.29379	0.010318	-1.0447	0.666066
CNAG_06021	rab GTPase activator (2681 nt)	5.16527	4.9443	5.06768	6.21781	6.15139	6.40269	5.01981	5.08919	5.28245	2.29455	0.00573553	1.05074	0.654979
CNAG_02966	carboxypeptidase (2824 nt)	1.61583	1.77022	1.70137	2.84873	2.80648	3.02794	1.8543	1.91295	1.47204	2.29513	0.00573553	1.03571	0.841313
CNAG_00490	acetyl-CoA acyltransferase (2507 nt)	4.4169	4.43573	4.73591	5.80646	5.49205	5.89071	4.08352	4.245	4.32443	2.29776	0.0109307	-1.24131	0.200966
CNAG_02655	hypothetical protein (1480 nt)	6.71557	6.63881	6.76286	7.90755	7.81055	8.00808	6.5325	6.52666	6.63753	2.30215	0.0053124	-1.10204	0.163504
CNAG_03765	trehalose-phosphatase (3776 nt)	6.55085	6.38028	6.44414	7.59784	7.59109	7.80054	6.89261	6.7559	6.91578	2.30494	0.00573553	1.31616	0.0688737
CNAG_06009	cyclohydrolase (2718 nt)	1.60493	1.47418	1.71298	3.06887	2.59875	2.75114	1.75192	1.66102	1.43468	2.3116	0.0176813	1.01291	0.925613
CNAG_04345	specific RNA polymerase II transcription factor (3658 nt)	3.52185	3.32788	3.49296	4.66973	4.66239	4.639	2.95402	2.60824	2.66631	2.31254	0.011484	-1.62981	0.0820856
CNAG_06963	sugar transporter (2829 nt)	5.89071	6.03599	6.20423	7.17868	7.24586	7.34454	6.31515	6.30571	6.29836	2.31774	0.00904308	1.19978	0.235043
CNAG_04217	phosphoenolpyruvate carboxykinase (ATP) (3178 nt)	2.71291	3.32225	3.11713	4.17448	4.29856	4.32012	3.77569	4.02032	3.85776	2.3192	0.0382099	1.78241	0.126242
CNAG_01713	hypothetical protein (877 nt)	7.15818	7.04832	7.07246	8.41959	8.20297	8.30945	7.00725	7.23474	7.05439	2.32573	0.00588813	1.00404	0.965491
CNAG_05077	glycosyl hydrolase (3627 nt)	5.73832	5.6843	5.75476	6.84649	6.90311	7.08311	5.70254	5.70429	5.72934	2.32695	0.010815	-1.00957	0.7201
CNAG_06355	hypothetical protein (1740 nt)	4.43896	4.06028	4.54414	5.6843	5.32238	5.71256	3.62997	3.71429	4.12955	2.33802	0.0148339	-1.43713	0.192727
CNAG_06923	phosphoketolase (3445 nt)	6.65216	6.10395	6.46899	7.57145	7.57608	7.77337	6.46615	6.157	6.54957	2.34881	0.0250277	-1.01218	0.959183
CNAG_00800	nicotinamidase (1375 nt)	4.03633	3.92187	4.10132	5.16321	4.95187	5.64103	3.58691	3.78717	3.49787	2.34923	0.0453068	-1.31573	0.115274
CNAG_03412	chitinase (2591 nt)	5.08443	5.08273	5.16146	6.3859	6.32542	6.32414	4.973	4.87005	4.90746	2.35481	0.00295356	-1.1429	0.0807292
CNAG_00264	nuclease I (2176 nt)	5.40826	5.39912	5.37426	6.56651	6.46439	6.8797	5.2212	5.24387	5.46387	2.36689	0.026996	-1.06012	0.542563
CNAG_06935	isochorismatase hydrolase (992 nt)	4.64417	4.6617	4.21543	5.86686	5.44789	5.94068	5.50429	5.48285	5.32119	2.3697	0.0167178	1.90397	0.0948039
CNAG_00283	hypothetical protein (1901 nt)	4.13167	3.96579	3.9986	5.21384	5.12566	5.49321	3.83452	3.64669	3.88171	2.3711	0.0130242	-1.18458	0.170218
CNAG_03268	hypothetical protein (986 nt)	8.208	8.13217	8.20297	9.29607	9.32552	9.66281	8.70533	8.57258	9.13796	2.37361	0.0218938	1.5414	0.184124
CNAG_06512	pirin (1429 nt)	4.92804	4.86062	5.00622	6.25114	6.05454	6.24529	4.36925	4.20905	4.42822	2.38176	0.00559186	-1.51164	0.0606009
CNAG_07522	hypothetical protein (2656 nt)	4.95742	4.64601	4.76556	5.9621	6.01024	6.15335	4.56377	4.42932	4.74395	2.3821	0.00750682	-1.15721	0.325117
CNAG_00638	GTPase (2662 nt)	5.24387	5.13274	5.44789	6.38368	6.42888	6.77109	4.61092	4.83463	4.90208	2.38344	0.0104524	-1.40668	0.10469
CNAG_05774	hypothetical protein (2042 nt)	5.45988	5.35828	5.41391	6.59857	6.52666	6.88305	4.80288	4.92049	5.03345	2.39287	0.0178178	-1.40615	0.0801286
CNAG_04392	sterol-binding protein (1448 nt)	4.29565	4.18649	4.6071	5.69514	5.49469	5.68067	4.23174	4.38818	4.27927	2.39565	0.0139644	-1.04489	0.782211
CNAG_02996	flavoprotein oxygenase (1997 nt)	4.28829	4.05858	3.94036	5.35198	5.10013	5.6382	4.60071	4.5374	4.59539	2.40776	0.0163478	1.39676	0.139274
CNAG_00581	saccharopepsin (2211 nt)	7.60603	7.59952	7.61429	8.79058	8.94515	8.94515	7.8696	7.72404	7.92248	2.44022	0.0100249	1.17454	0.17439
CNAG_00807	hypothetical protein (5669 nt)	2.35095	2.4781	2.60824	3.719	3.72666	3.87382	2.10021	1.92213	2.20444	2.45218	0.00573553	-1.32271	0.113056
CNAG_07600	beta-glucosidase (3249 nt)	3.02702	3.17992	3.32635	4.29225	4.42364	4.70255	3.21335	3.32161	3.31882	2.45386	0.00997067	1.07686	0.500386
CNAG_02000	short-chain dehydrogenase (3165 nt)	4.99613	4.89376	4.99755	6.17411	6.10061	6.50865	4.65407	4.58395	4.78206	2.45998	0.0204242	-1.22189	0.108205
CNAG_06999	hypothetical protein (2184 nt)	3.58126	3.42405	3.06445	4.71083	4.66658	4.59068	2.64156	2.85142	2.93886	2.46133	0.0287343	-1.46001	0.160269
CNAG_04070	exonuclease (3958 nt)	4.30107	4.15177	4.50915	5.54486	5.45063	5.86763	4.07373	4.16976	4.40291	2.46294	0.0102548	-1.07564	0.639064
CNAG_04474	monocarboxylic acid transporter (2334 nt)	3.94218	4.12807	3.88611	5.29495	5.23036	5.35081	3.87382	4.03268	3.29589	2.47356	0.00725621	-1.1903	0.534249
CNAG_05138	glucan 1,3-beta-glucosidase (4235 nt)	5.79931	5.84091	5.76542	7.04691	7.14865	7.13723	6.16103	5.98887	5.74804	2.47778	0.00422177	1.12047	0.460067
CNAG_05260	glutamate decarboxylase (2852 nt)	6.8196	6.71831	6.836	8.05382	8.03536	8.21528	7.27188	7.11934	7.35214	2.47973	0.0049407	1.37219	0.0820856
CNAG_03110	hypothetical protein (4034 nt)	4.04254	3.94345	4.02703	5.28594	5.2247	5.44063	3.59034	3.65306	3.78209	2.48414	0.00623529	-1.2563	0.0921802
CNAG_04274	acyl-CoA thioesterase II (1867 nt)	1.69957	1.8287	1.97425	3.10374	3.00105	3.33944	1.42254	1.43212	1.85575	2.48613	0.00722114	-1.20083	0.351415
CNAG_01896	alcohol dehydrogenase (NADP ) (1775 nt)	9.9901	9.94281	9.94281	11.0857	11.1848	11.5623	10.6743	10.6068	10.772	2.495	0.0298896	1.65379	0.0561432
CNAG_02362	hypothetical protein (2116 nt)	4.77372	4.69269	4.71154	6.04263	5.84192	6.25292	4.95742	4.92383	5.10287	2.49639	0.0205628	1.20474	0.116154
CNAG_06541	hypothetical protein (3271 nt)	4.78206	4.82076	4.55229	5.99343	6.11945	6.00497	4.83792	4.92282	4.74262	2.49824	0.00814564	1.08379	0.472766
CNAG_06448	cystathionine gamma-lyase (2079 nt)	1.94093	1.43468	1.34738	2.94372	2.81428	2.93218	1.72586	2.16022	1.52702	2.50082	0.0365984	1.17286	0.578605
CNAG_03677	hypothetical protein (3062 nt)	6.90688	6.60958	6.92682	8.06615	8.10754	8.23899	7.45374	7.22632	7.70238	2.50209	0.00997067	1.56524	0.113172
CNAG_02592	thioredoxin reductase GliT (1542 nt)	1.8856	2.09462	2.35012	3.49401	3.51735	3.29282	2.13124	2.20748	2.29869	2.50466	0.0138391	1.07353	0.666803
CNAG_00497	hypothetical protein (3322 nt)	4.86931	4.68483	4.92438	6.06291	6.09081	6.31162	4.81113	4.69297	4.94385	2.51218	0.00573553	-1.00709	0.951831
CNAG_01239	chitin deacetylase (2561 nt)	4.9389	4.87204	4.6819	6.06968	6.22349	6.18664	4.98161	4.80527	4.95207	2.51226	0.00596737	1.05851	0.584754
CNAG_04886	hypothetical protein (2666 nt)	3.17992	3.09444	3.10374	4.65407	4.36735	4.36133	2.80648	2.92677	2.87243	2.52255	0.0140292	-1.19538	0.0688737
CNAG_03991	integral membrane protein (2130 nt)	4.80998	4.87882	4.92049	6.14668	6.14358	6.33307	4.38717	4.31628	4.67624	2.52803	0.00573553	-1.32856	0.169697
CNAG_00791	hypothetical protein (4201 nt)	3.37184	3.21976	3.0576	4.5004	4.59197	4.60139	3.34688	3.5304	3.41644	2.54592	0.0112081	1.16057	0.268647
CNAG_02969	thioesterase family protein (2288 nt)	4.06776	4.22304	4.25445	5.45903	5.34575	5.80723	3.51364	3.77277	3.92382	2.55901	0.0171869	-1.36132	0.155972
CNAG_04103	hypothetical protein (2576 nt)	1.63772	1.52361	2.17981	3.24642	2.9985	3.17284	2.29623	2.35012	2.48389	2.56485	0.0333021	1.51191	0.220211
CNAG_07347	heat shock protein (3389 nt)	5.75878	5.68361	5.52523	6.8956	6.8797	7.27188	7.36176	7.48432	7.28127	2.56659	0.0122501	3.29416	0.0239553
CNAG_04911	hypothetical protein (3433 nt)	1.77461	1.60493	1.48486	2.99398	2.87877	3.0734	1.64796	1.77726	1.34738	2.56789	0.00588813	-1.02144	0.90459
CNAG_01108	allantoicase (3230 nt)	3.89011	3.88559	4.01608	5.37426	5.21047	5.30283	3.77441	3.80877	3.81769	2.57623	0.00422177	-1.09452	0.210221
CNAG_07691	hypothetical protein (1697 nt)	3.49974	3.70672	3.23275	4.90979	4.80527	4.82042	3.19579	3.18623	3.23154	2.57652	0.022774	-1.21018	0.32931
CNAG_00933	hypothetical protein (991 nt)	5.09351	4.74962	5.08738	6.43003	6.18609	6.42367	4.79823	4.56785	4.50338	2.58428	0.0083299	-1.27782	0.198798
CNAG_05388	formamidopyrimidine-DNA glycosylase (2602 nt)	4.32899	4.20633	4.04614	5.58921	5.42629	5.67859	4.2015	4.18823	4.09775	2.58628	0.00573553	-1.02195	0.836693
CNAG_03666	acyl-CoA dehydrogenase (2622 nt)	3.63826	3.73806	4.15177	5.14398	5.12801	5.38253	2.87243	3.03673	3.18387	2.59454	0.0169461	-1.75526	0.104819
CNAG_05521	aldose reductase (1755 nt)	6.69828	6.5913	6.69773	8.02128	7.95452	8.1501	6.8399	6.81533	6.98228	2.60184	0.00486424	1.1621	0.13057
CNAG_01604	TIGR01458 family HAD hydrolase (1579 nt)	4.40888	4.21828	4.53449	5.7529	5.73566	5.81271	4.10269	4.12906	4.23767	2.60245	0.0133654	-1.17344	0.251957
CNAG_03563	aspartate-tRNA(Asn) ligase (3098 nt)	5.2226	5.05842	5.28594	6.44282	6.43633	6.83876	5.19042	5.23589	5.456	2.60928	0.0131935	1.07558	0.534503
CNAG_03806	acyltransferase (1876 nt)	4.78754	4.5137	4.27709	6.10644	5.83986	5.78804	4.9412	4.65018	4.70105	2.61233	0.0126196	1.17939	0.409495
CNAG_05602	1-pyrroline-5-carboxylate dehydrogenase (2167 nt)	8.94515	9.22466	9.17464	10.3554	10.5906	10.5546	8.85414	9.00314	8.81055	2.61241	0.00573553	-1.16922	0.240917
CNAG_07862	fumarate reductase (3243 nt)	4.16347	4.15928	4.45305	5.67417	5.56047	5.69909	3.63065	3.52775	3.54775	2.61349	0.010044	-1.61315	0.0901243
CNAG_01043	hypothetical protein (1517 nt)	9.00314	8.87227	8.91818	10.1034	10.1595	10.6962	9.31985	9.31985	9.57735	2.61811	0.0360847	1.38943	0.104661
CNAG_05682	hypothetical protein (975 nt)	8.79976	8.69345	8.81475	9.9901	9.96213	10.5258	9.38424	9.38049	9.59857	2.62082	0.0343606	1.60783	0.0637182
CNAG_07551	hypothetical protein (2423 nt)	4.7677	4.73768	4.38818	6.0019	6.12407	5.93963	4.53617	4.47658	4.60913	2.62201	0.0130274	-1.06479	0.672697
CNAG_00269	sorbitol dehydrogenase (2168 nt)	1.12422	0.829781	1.3492	2.684	2.24283	2.55022	2.45058	2.32557	2.75876	2.62312	0.0122501	2.65842	0.0570062
CNAG_01821	hypothetical protein (1460 nt)	5.70509	5.70359	5.71725	6.95238	6.95658	7.39157	5.94557	5.89013	6.20645	2.62358	0.0291276	1.23577	0.219186
CNAG_03564	hypothetical protein (1785 nt)	4.76053	4.66048	4.87882	6.24995	5.99852	6.23383	5.02109	4.61164	5.02411	2.62835	0.00573553	1.08599	0.630779
CNAG_04587	hypothetical protein (4188 nt)	4.67362	4.45844	4.2598	5.83836	5.77578	5.96667	4.80183	4.66906	4.77802	2.63229	0.012042	1.21899	0.269579
CNAG_00605	cytoplasmic protein (1906 nt)	5.60893	5.55074	5.75043	7.14251	6.69917	7.26732	6.02511	5.89505	5.80139	2.63834	0.0255691	1.20621	0.13887
CNAG_05739	hypothetical protein (1553 nt)	4.12465	4.1306	4.38717	5.69219	5.37602	5.78895	4.36402	3.98895	4.43637	2.64802	0.00941076	1.03453	0.858917
CNAG_04625	cerevisin (2334 nt)	5.89773	5.75043	5.94146	7.2365	7.18153	7.38911	6.32247	6.18106	6.43819	2.64972	0.00448812	1.3667	0.0834994
CNAG_02986	ADP-ribose pyrophosphatase (1373 nt)	6.36614	6.15502	6.35844	7.58714	7.54315	7.96934	5.94444	5.99852	6.26487	2.65125	0.0131797	-1.16791	0.28939
CNAG_01380	phosphatidylserine decarboxylase (2463 nt)	5.11743	5.10612	5.34131	6.52805	6.47969	6.78111	4.90335	4.95125	5.30213	2.65369	0.00588588	-1.09889	0.565829
CNAG_00301	hypothetical protein (1552 nt)	5.34951	5.2691	5.40771	6.71589	6.7042	6.84423	5.61974	5.60716	5.60377	2.66229	0.00422177	1.20424	0.109196
CNAG_02967	hypothetical protein (1498 nt)	5.58245	5.37426	5.62969	6.89332	6.82218	7.11475	4.72701	4.89963	5.01549	2.66589	0.00573553	-1.5671	0.0688737
CNAG_00826	dihydroxyacetone kinase (2511 nt)	2.40458	2.35725	2.59744	3.89277	3.76806	3.94573	3.50107	3.02702	3.35872	2.66801	0.0053124	1.79317	0.0903265
CNAG_01097	short-chain dehydrogenase/reductase SDR (1876 nt)	6.01927	6.09081	6.11543	7.43704	7.45956	7.60427	5.91004	6.0019	6.1391	2.68537	0.00486424	-1.04113	0.627182
CNAG_03012	hypothetical protein (998 nt)	11.0489	11.0489	10.9339	12.6676	12.2418	12.4331	11.7121	11.5006	11.7263	2.70746	0.0165135	1.55375	0.0669548
CNAG_02978	hypothetical protein (1080 nt)	3.58954	3.3972	3.90781	4.85324	5.0347	5.3377	3.17122	3.25376	2.88017	2.72017	0.0117444	-1.44373	0.163325
CNAG_07844	hypothetical protein (755 nt)	2.53399	2.59991	1.81963	3.89946	3.98895	3.4006	2.25992	2.18493	3.28501	2.72293	0.0309086	1.19646	0.711197
CNAG_03794	endoplasmic reticulum protein (2028 nt)	5.11361	4.79042	4.93385	6.31162	6.16777	6.69828	4.53095	4.72608	4.51884	2.72564	0.0143141	-1.2781	0.148082
CNAG_05290	transcription initiation protein SPT3 (2152 nt)	4.70024	4.61952	4.65018	6.01895	6.1189	6.18106	4.33039	4.40251	4.62137	2.73143	0.00486424	-1.15287	0.278882
CNAG_04361	hypothetical protein (3458 nt)	5.66924	5.56662	5.70429	7.02418	7.01622	7.26593	5.42921	5.39062	5.71101	2.74232	0.00694162	-1.09919	0.467209
CNAG_00696	alpha-mannosidase (5116 nt)	3.27445	3.29973	3.35313	4.7212	4.62581	4.95642	3.1456	3.36635	3.13147	2.74862	0.0139644	-1.06779	0.495657
CNAG_06511	hypothetical protein (2028 nt)	5.43617	5.29124	5.57871	6.94472	6.7438	6.99404	5.26256	4.98939	5.35155	2.74883	0.00549219	-1.17626	0.314943
CNAG_05095	pod-specific dehydrogenase SAC25 (1575 nt)	5.45753	5.46781	5.46973	6.87815	6.83481	7.05951	5.04769	5.01342	5.25264	2.74943	0.0117139	-1.28382	0.144913
CNAG_05686	hypothetical protein (830 nt)	7.05332	6.80666	7.0259	8.3838	8.3164	8.58576	7.20049	7.16383	7.39017	2.76389	0.00534274	1.22225	0.163504
CNAG_00920	YjeF family protein (1960 nt)	4.7444	4.7936	5.12175	6.26487	6.09859	6.6996	4.35377	4.49455	4.67136	2.76594	0.0161669	-1.30137	0.189668
CNAG_03999	hypothetical protein (1201 nt)	4.08729	4.08108	4.07373	5.44063	5.47123	5.73482	4.48219	4.36735	4.56034	2.76676	0.0161669	1.30972	0.108205
CNAG_06497	microsomal epoxide hydrolase (1818 nt)	4.31628	4.14206	4.71645	5.74179	5.76397	6.09128	4.46042	4.37813	4.72522	2.77808	0.0144522	1.09404	0.686838
CNAG_02815	glycerol-3-phosphate dehydrogenase (2769 nt)	6.16362	6.07533	6.06794	7.40342	7.43456	7.89357	6.14358	5.9248	6.44557	2.77961	0.0265025	1.049	0.797212
CNAG_05119	GabA permease (2371 nt)	2.27183	2.28314	2.01947	3.68498	3.5164	3.81381	2.1787	2.04589	2.55022	2.78997	0.00573553	1.04739	0.81967
CNAG_06913	L-serine ammonia-lyase (2459 nt)	2.18786	2.06299	1.42401	3.59356	3.38702	3.14651	2.40082	1.6292	1.93321	2.79739	0.0292812	1.0689	0.859471
CNAG_03974	hypothetical protein (1679 nt)	5.72038	5.61469	5.64589	7.04592	6.96241	7.43847	5.97782	5.998	6.35239	2.80619	0.0230021	1.36517	0.173459
CNAG_01893	glutathione S-transferase Gst3 (1580 nt)	5.82693	5.6382	5.98805	7.26868	7.16667	7.48802	5.59174	5.38695	5.87037	2.80901	0.00615752	-1.1498	0.47142
CNAG_02355	solute carrier family 35 (UDP-xylose/UDP-N-acetylglucosamine transporter), member B4 (2069 nt)	4.24047	4.11775	4.54982	5.78454	5.64476	5.95158	4.02065	4.25932	4.30391	2.81073	0.00892674	-1.07777	0.664411
CNAG_06791	hypothetical protein (2723 nt)	4.42237	4.42188	4.73648	5.95812	5.90171	6.20759	4.07666	3.93351	4.24865	2.81974	0.00640509	-1.3572	0.134254
CNAG_03083	cupin domain-containing protein (799 nt)	3.4251	3.32376	3.76722	5.00443	4.82422	5.1887	3.48792	3.73296	4.23133	2.82925	0.00894033	1.24146	0.460271
CNAG_06556	oxidoreductase (1920 nt)	1.19559	1.48125	1.39851	2.97613	2.81046	2.79769	1.40163	1.30089	1.5778	2.83426	0.00573553	1.0485	0.715224
CNAG_04469	4-aminobutyrate transaminase (2099 nt)	2.24465	2.28786	2.22952	3.86159	3.53472	3.88171	1.77461	1.33098	1.77461	2.83889	0.0176788	-1.54465	0.160917
CNAG_05654	hypothetical protein (1462 nt)	5.58553	5.39062	5.46644	6.94612	7.1119	6.90883	5.28298	5.49205	5.56541	2.84433	0.00448812	-1.02388	0.842743
CNAG_04142	tartrate transporter (2171 nt)	3.09347	3.36635	3.32788	4.64601	4.70781	4.96155	3.23392	2.90551	3.28197	2.84657	0.00573553	-1.08832	0.598536
CNAG_04789	hypothetical protein (1319 nt)	5.57871	5.46914	5.75589	7.01495	7.03737	7.28355	5.38283	5.4445	5.41669	2.84951	0.00563286	-1.13805	0.293576
CNAG_01588	plasma membrane proteolipid 3 (1425 nt)	8.3882	8.20995	8.44457	9.86038	9.6942	10.0236	8.35357	8.24736	8.76913	2.85168	0.00575502	1.07857	0.704647
CNAG_00921	glutathione transferase (1285 nt)	5.00871	5.09469	5.17416	6.63297	6.34895	6.85343	5.49205	5.36424	5.38112	2.86645	0.0185173	1.24829	0.0767968
CNAG_04043	hypothetical protein (1417 nt)	4.09978	3.97087	4.50003	5.49271	5.40372	6.23662	4.10367	4.09162	4.64751	2.86948	0.0326164	1.06489	0.82198
CNAG_00531	potassium/sodium efflux P-type ATPase, fungal-type (3993 nt)	5.25086	5.31553	5.19224	6.67341	6.71097	6.95105	5.69427	5.64294	5.53282	2.87907	0.0083299	1.29277	0.0666994
CNAG_07319	hypothetical protein (1027 nt)	6.15139	6.21781	6.38368	7.76717	7.59952	7.97968	6.16835	6.03951	6.14668	2.89019	0.00747632	-1.0964	0.337519
CNAG_00711	hypothetical protein (1979 nt)	4.29941	4.30182	4.73042	5.91941	5.85033	6.16478	3.91887	3.79117	4.28628	2.89646	0.0103512	-1.36142	0.230329
CNAG_05115	sarcosine oxidase (2037 nt)	7.07246	7.15818	7.12503	8.64366	8.70533	8.63314	6.68215	6.64108	6.44414	2.91229	0.00268496	-1.44336	0.088352
CNAG_02690	pirin (1855 nt)	4.88898	4.82599	5.1667	6.45261	6.24087	6.81781	4.65336	4.29225	4.62581	2.91442	0.0137468	-1.35355	0.160953
CNAG_01952	aryl-alcohol dehydrogenase (2512 nt)	4.06594	4.2015	4.27053	5.73421	5.68829	5.74804	4.38523	4.44536	4.71995	2.9164	0.00725621	1.26358	0.178109
CNAG_00735	aldehyde dehydrogenase family 7 member A1 (3378 nt)	6.01476	6.15912	6.10395	7.63355	7.65016	7.62693	6.55166	6.48075	6.22988	2.91656	0.00673679	1.2554	0.178635
CNAG_01686	hypothetical protein (1853 nt)	6.11945	6.00875	6.31243	7.69178	7.47185	7.91563	6.01237	5.77811	6.12331	2.92049	0.00842667	-1.12944	0.420742
CNAG_06204	high-affinity nicotinic acid transporter (2142 nt)	5.3628	5.0347	5.28298	6.73206	6.80714	6.81407	4.92081	5.12877	4.97787	2.94362	0.0123668	-1.16286	0.293188
CNAG_05097	YjeF family protein (1642 nt)	6.09482	6.00791	6.25916	7.56073	7.48432	8.00211	5.91534	5.85724	6.15032	2.95213	0.0162991	-1.10675	0.433635
CNAG_05590	hypothetical protein (6296 nt)	6.12407	6.08296	5.83907	7.46084	7.65472	7.61934	5.93173	6.00497	5.82342	2.95453	0.00573553	-1.06831	0.567703
CNAG_05607	cytoplasmic protein (3063 nt)	4.52899	4.41249	4.61164	5.96563	6.01476	6.27252	4.42556	4.19481	4.3151	2.96205	0.00633477	-1.15339	0.209547
CNAG_01138	cytochrome c peroxidase, mitochondrial (1756 nt)	8.41202	8.45922	8.22248	9.93099	9.95459	9.91767	8.00808	7.91105	7.75363	2.96872	0.0107479	-1.38862	0.0840143
CNAG_00870	hypothetical protein (2221 nt)	1.32918	0.675401	0.809768	2.40907	2.3485	2.7674	1.51359	1.14423	1.33098	2.96948	0.0173499	1.31174	0.328023
CNAG_06694	hydroxyisourate hydrolase (769 nt)	5.57242	5.21047	5.48052	7.04079	6.85878	7.07892	5.31553	5.44789	5.67652	2.97254	0.00725621	1.04163	0.814177
CNAG_03232	lactamase (1542 nt)	6.21223	6.05454	6.262	7.60603	7.58404	8.05382	6.23791	6.19948	6.49661	2.97257	0.0163385	1.09815	0.460979
CNAG_03565	plasma-membrane proton-efflux P-type ATPase (4890 nt)	4.88293	4.90208	4.78148	6.22988	6.31393	6.7438	4.87687	4.68737	4.8688	2.97669	0.0230598	-1.03131	0.704075
CNAG_04067	haloacid dehalogenase, type II (2304 nt)	4.65336	4.85391	4.85324	6.31832	6.14198	6.62268	4.40322	4.20975	4.43734	2.97761	0.0126453	-1.35353	0.0860854
CNAG_05632	hypothetical protein (1242 nt)	4.51884	4.61761	4.67958	6.16264	6.15984	6.22423	4.19615	4.19018	4.11521	2.98327	0.0049407	-1.35488	0.0628359
CNAG_04631	ribitol kinase (2671 nt)	2.87756	3.37268	3.58954	4.76465	4.72869	5.08496	4.0545	4.1932	4.09646	2.98867	0.0213735	1.7836	0.166336
CNAG_00248	ESCRT-II complex subunit VPS36 (4387 nt)	4.0448	4.08352	4.1384	5.70509	5.6382	5.68544	4.45844	4.48026	4.33676	3.00493	0.00268496	1.26247	0.0710714
CNAG_06905	cytoplasmic protein (1330 nt)	6.60083	6.49565	6.68347	8.17268	8.08355	8.28966	6.49249	6.60329	6.60083	3.00767	0.00422177	-1.01944	0.797929
CNAG_04657	short-chain dehydrogenase (1225 nt)	5.87759	5.68969	5.6644	7.42374	7.12756	7.45956	6.5217	6.43819	6.41727	3.01688	0.00671261	1.64167	0.0606009
CNAG_04659	pyruvate decarboxylase (2598 nt)	6.43074	6.12758	6.4608	7.82654	7.77549	8.208	6.27872	6.13734	6.56252	3.02508	0.00837916	-1.00941	0.961417
CNAG_00130	CAMK/CAMK1/CAMK1-RCK protein kinase (5142 nt)	5.70838	5.57564	5.62662	7.10011	7.19943	7.40522	5.72537	5.67652	5.71843	3.02731	0.00782103	1.04964	0.355384
CNAG_04704	MFS transporter, SHS family, lactate transporter (2792 nt)	0.644449	0.226967	0.649245	1.95235	1.94093	2.42521	0.61771	0.514143	0.250312	3.02991	0.0108244	-1.03252	0.877038
CNAG_02335	hypothetical protein (2639 nt)	7.57721	7.47457	7.83897	9.07436	9.15288	9.46878	8.24736	8.26988	8.50188	3.03513	0.00707994	1.63519	0.0783908
CNAG_02264	AFG1-family ATPase (4328 nt)	4.1384	4.03438	4.52391	5.84285	5.50317	6.20482	4.21828	4.0571	4.37144	3.0696	0.0162262	-1.01159	0.955066
CNAG_07538	calcium/proton exchanger (3114 nt)	5.12264	4.99983	5.00188	6.58007	6.68607	6.74903	5.33482	5.30946	5.18094	3.09571	0.00422177	1.17578	0.11087
CNAG_02865	hypothetical protein (1488 nt)	1.82139	2.24283	1.70517	3.82807	3.57116	3.26109	2.03387	2.26681	2.03149	3.0958	0.0116806	1.13886	0.533595
CNAG_05891	TDG/mug DNA glycosylase (2401 nt)	3.20178	3.3089	3.62714	4.87504	4.97584	5.18806	3.38196	3.36152	3.62007	3.10309	0.00759125	1.05354	0.762974
CNAG_04185	hypothetical protein (1414 nt)	3.03935	2.62065	3.21831	4.53999	4.34145	4.90208	2.74756	2.49902	3.51735	3.10603	0.0126886	-1.02678	0.949073
CNAG_02943	cytoplasmic protein (2811 nt)	7.89091	7.81346	7.8696	9.38843	9.4922	9.59857	7.97464	7.9191	8.13217	3.10604	0.00588588	1.11007	0.271435
CNAG_06121	hypothetical protein (1242 nt)	6.28272	6.27252	6.33841	7.85091	7.75609	8.19231	5.63555	5.56047	5.99516	3.10636	0.0193438	-1.48194	0.159258
CNAG_06399	SH3 domain-containing protein (2367 nt)	5.62321	5.59279	5.9729	7.3666	7.13723	7.59952	5.69349	5.57242	5.98805	3.11267	0.00781155	1.01515	0.940304
CNAG_04735	extracellular elastinolytic metalloproteinase (3238 nt)	3.89946	3.65202	3.90059	5.38253	5.43306	5.55359	3.77341	3.53641	3.79654	3.11457	0.00573553	-1.08316	0.534626
CNAG_01584	hydrolase (1872 nt)	3.44193	3.69097	3.72405	5.21829	5.14398	5.43458	3.23275	3.21645	3.56409	3.13102	0.00532463	-1.21522	0.268017
CNAG_01261	myosin I binding protein (4908 nt)	4.96469	4.78986	5.14933	6.52552	6.55313	6.77003	4.69689	4.8391	4.99689	3.13457	0.00575502	-1.0895	0.56215
CNAG_03705	hypothetical protein (1425 nt)	7.53669	7.37327	7.62136	9.12498	9.04943	9.31985	7.45956	7.34159	7.79734	3.14774	0.00486424	1.01564	0.933469
CNAG_04076	hypothetical protein (736 nt)	6.10395	5.96289	6.2963	7.65235	7.56872	8.10635	6.01895	5.83063	6.08094	3.14871	0.0127833	-1.10512	0.465142
CNAG_01118	AAT family amino acid transporter (3091 nt)	2.82765	2.71144	2.73057	4.42556	4.36858	4.44052	2.62521	2.43588	2.14157	3.14924	0.00422177	-1.27957	0.258953
CNAG_02673	NAD dependent epimerase/dehydratase family protein (1418 nt)	7.78273	7.63159	7.56367	9.36248	9.19802	9.38424	7.52031	7.25961	7.49666	3.15051	0.00422177	-1.17593	0.227174
CNAG_02079	cytoplasmic protein (5007 nt)	5.72934	5.7529	5.82137	7.39878	7.3089	7.57392	5.81745	5.65275	5.9614	3.1587	0.00763942	1.03001	0.790902
CNAG_05915	hypothetical protein (2848 nt)	2.8975	2.82432	2.86819	4.38523	4.46171	4.74796	3.4428	2.97466	3.08945	3.17839	0.0146303	1.23597	0.306038
CNAG_02050	hypothetical protein (4270 nt)	3.61702	3.81637	3.71351	5.36648	5.36953	5.42133	3.62116	3.65239	3.69048	3.18248	0.0064546	-1.04316	0.555089
CNAG_04112	oxidoreductase (2114 nt)	4.06446	4.16064	4.40727	5.76324	5.63496	6.24897	4.44886	4.51606	4.67803	3.18568	0.0158334	1.263	0.176266
CNAG_02047	hypothetical protein (1601 nt)	5.05067	5.06359	5.21113	6.73779	6.63569	7.03093	4.8095	4.52245	4.98413	3.23329	0.0100933	-1.26263	0.255342
CNAG_02417	lipase/esterase family protein (3344 nt)	3.53472	3.33125	3.61475	4.99755	5.03857	5.53282	2.71644	2.66831	2.82035	3.24017	0.0147829	-1.69178	0.0658597
CNAG_02851	threonine aldolase (1899 nt)	6.08221	5.98449	6.09128	7.72036	7.80854	7.74471	6.06082	6.02208	5.971	3.26078	0.00285953	-1.02434	0.611005
CNAG_04186	hypothetical protein (1260 nt)	5.04606	4.41149	4.76979	6.54809	6.20645	6.63392	3.93395	3.58312	3.95843	3.29523	0.0122501	-1.88855	0.106533
CNAG_07512	hypothetical protein (2789 nt)	3.06445	3.0328	2.83472	4.63259	4.62185	4.84967	3.47791	3.52535	3.49296	3.30362	0.00448812	1.43536	0.0977962
CNAG_02407	phospholipase D (4377 nt)	4.91767	4.7994	5.12619	6.54658	6.55085	6.92141	4.43031	4.39925	4.74873	3.30625	0.00671261	-1.33947	0.155972
CNAG_03983	oxidoreductase (1621 nt)	8.89989	8.58576	8.76913	10.4207	10.3098	10.7258	9.58797	9.58797	9.6942	3.32613	0.00675647	1.82993	0.0688737
CNAG_04314	NAD kinase (2079 nt)	5.32583	4.89714	4.59134	6.8231	6.57712	6.64934	4.57295	4.34145	4.64812	3.35214	0.0253267	-1.33539	0.327323
CNAG_01061	serine/threonine protein kinase (3772 nt)	2.31626	2.22819	2.26681	4.11003	4.01446	3.95843	2.2515	2.06619	1.9177	3.38047	0.00422177	-1.14231	0.326824
CNAG_04386	hypothetical protein (1391 nt)	4.30352	4.21762	4.41641	6.08094	5.94234	6.19948	4.40432	3.87276	4.5437	3.39106	0.00448812	-1.02735	0.917293
CNAG_01753	hypothetical protein (1324 nt)	8.01345	7.73478	7.97831	9.49996	9.51157	10.001	8.13609	8.11818	8.6056	3.39166	0.0122699	1.29934	0.268017
CNAG_02263	hypothetical protein (1607 nt)	5.13831	5.11613	5.4445	6.79173	6.8196	7.39017	5.26337	4.87323	5.67224	3.40467	0.0155264	1.02572	0.934199
CNAG_01090	alpha/beta hydrolase fold protein (1531 nt)	3.99918	3.90964	4.15885	5.67098	5.5283	6.18734	4.01829	4.00278	3.9543	3.4176	0.0216956	-1.02155	0.815153
CNAG_02427	hypothetical protein (1408 nt)	5.03857	5.18716	5.10138	6.77917	6.69236	7.21749	5.583	5.49049	5.54914	3.4517	0.0190896	1.34895	0.0569197
CNAG_03881	hypothetical protein (3330 nt)	3.80146	3.86366	3.22893	5.37177	5.41845	5.48975	3.14967	3.2904	3.22129	3.47089	0.0291276	-1.32951	0.322369
CNAG_05410	hypothetical protein (2126 nt)	3.43433	3.25081	3.22804	5.0149	5.00871	5.28594	3.60707	3.26206	3.50263	3.47928	0.00524526	1.11177	0.442766
CNAG_00465	hypothetical protein (870 nt)	6.86115	6.8732	7.29928	8.76371	8.56909	9.14243	6.77542	6.57541	7.06299	3.51584	0.00958994	-1.15397	0.518209
CNAG_06432	acetate kinase (1956 nt)	7.00565	6.66049	6.92457	8.63823	8.54011	8.89989	6.67251	6.40742	6.91107	3.55333	0.00573553	-1.14862	0.488828
CNAG_01081	hypothetical protein (1630 nt)	3.48939	3.52036	3.52535	5.36953	5.08537	5.57564	3.18387	2.94052	3.20178	3.55984	0.0195872	-1.32223	0.142213
CNAG_02542	fructosamine kinase (1571 nt)	5.52013	5.26077	5.91055	7.36176	7.18922	7.63886	4.91562	4.94666	5.35081	3.56226	0.011693	-1.40716	0.247717
CNAG_01348	cyanate hydratase (2322 nt)	5.89013	5.5217	5.74699	7.60427	7.24389	7.83124	5.89145	5.7321	6.16777	3.58058	0.0107479	1.15736	0.431592
CNAG_03958	hypothetical protein (1238 nt)	5.8149	5.80139	6.01024	7.70296	7.58503	7.88826	5.45174	5.32716	5.72337	3.60478	0.00486424	-1.29661	0.184008
CNAG_06672	formate dehydrogenase (2268 nt)	1.249	1.25113	1.33931	3.20751	2.81911	3.37729	2.10475	2.00435	2.16836	3.61707	0.0211394	1.75646	0.0418407
CNAG_02843	hypothetical protein (1597 nt)	8.16248	7.97186	8.07792	9.82082	9.82082	10.1376	7.89747	7.79333	8.05382	3.61915	0.00673679	-1.1141	0.326179
CNAG_04879	glycogen debranching enzyme (6073 nt)	4.69356	4.59658	4.89943	6.46325	6.49249	6.84277	4.93309	4.81661	5.10927	3.65442	0.0059489	1.16727	0.288456
CNAG_00036	Sec14 cytosolic factor (1571 nt)	3.33944	3.22893	3.4119	5.30025	4.94316	5.35155	2.70363	2.91524	2.58535	3.65928	0.010281	-1.50735	0.0875784
CNAG_03824	solute carrier family 25 (mitochondrial phosphate transporter), member 3 (1744 nt)	7.47343	7.18517	7.49025	9.18895	9.11439	9.48673	7.20982	7.00424	7.42374	3.6818	0.00573553	-1.12533	0.495657
CNAG_01112	xenobiotic reductase (1755 nt)	6.07903	5.92565	5.9607	7.80054	7.72799	8.08616	5.52221	5.60257	5.78751	3.68868	0.00828799	-1.27547	0.120455
CNAG_01942	hypothetical protein (841 nt)	5.79807	5.83413	5.79083	7.69816	7.58199	7.81648	5.81574	5.86832	6.27618	3.70944	0.00791091	1.13215	0.498795
CNAG_02877	hypothetical protein (3736 nt)	3.56102	3.42951	3.19729	5.24691	5.30497	5.31951	3.96579	3.76003	3.94841	3.718	0.0119313	1.40978	0.114353
CNAG_00686	hypothetical protein (1549 nt)	9.26739	9.06564	9.3536	11.0099	10.9078	11.4734	9.06564	8.98239	9.18895	3.73596	0.012731	-1.10948	0.385832
CNAG_04862	glutamate synthase (NADPH/NADH) (7298 nt)	2.92121	2.65593	2.91981	4.79773	4.65407	4.76847	2.33763	2.20444	2.33301	3.75228	0.00575502	-1.4546	0.0900386
CNAG_07745	alcohol dehydrogenase, propanol-preferring (2257 nt)	5.34657	5.13921	5.71843	7.22012	7.0259	7.69816	4.9443	4.82921	5.27182	3.76676	0.0115337	-1.30703	0.295147
CNAG_06285	hypothetical protein (700 nt)	4.54938	4.73106	4.65812	6.60083	6.1391	6.96448	5.24069	5.0249	4.84786	3.78936	0.0313489	1.31187	0.171016
CNAG_02444	hypothetical protein (1673 nt)	4.66632	4.57243	4.94316	6.62474	6.37581	6.9588	4.66724	4.50404	4.67568	3.79951	0.00957397	-1.08046	0.583205
CNAG_00766	hypothetical protein (3146 nt)	3.34317	3.13147	3.54775	5.17137	5.03429	5.5966	2.61751	2.79081	3.03482	3.80165	0.00904062	-1.44035	0.137347
CNAG_04938	hypothetical protein (1836 nt)	5.37691	5.22888	5.54606	7.2643	7.14251	7.53116	5.48342	5.26994	5.78804	3.80713	0.00573553	1.09418	0.645401
CNAG_00522	C2 domain-containing protein (4040 nt)	5.11237	5.0243	5.28909	6.97082	6.836	7.43704	4.93245	5.01892	5.39689	3.83536	0.0148339	-1.01807	0.926091
CNAG_00637	cystathionine beta-synthase (2025 nt)	4.05858	3.85931	4.094	5.89951	5.78182	6.1578	4.18476	4.10198	4.3998	3.84347	0.00573553	1.16868	0.265758
CNAG_04621	glycogen(starch) synthase (3585 nt)	5.38989	5.65447	5.61974	7.44038	7.4271	7.63159	5.22657	5.43458	5.2177	3.85034	0.00448812	-1.19893	0.201462
CNAG_06602	cysteine-type peptidase (1311 nt)	6.53486	6.3957	6.56536	8.39911	8.21156	8.75465	6.43633	6.40504	6.6115	3.88111	0.0148347	-1.00999	0.91805
CNAG_03084	endoribonuclease L-PSP (2721 nt)	3.25936	3.26781	3.4006	5.3623	4.92438	5.51335	4.13513	3.68498	3.96837	3.88367	0.0190896	1.53712	0.128915
CNAG_06800	hypothetical protein (901 nt)	7.38092	7.15013	7.18153	9.13284	9.16472	9.31082	7.85311	7.70691	8.20995	3.90485	0.00422177	1.60859	0.12227
CNAG_01252	thiosulfate/3-mercaptopyruvate sulfurtransferase (1812 nt)	3.08255	2.79686	3.28426	5.07016	4.89714	5.13618	2.85014	2.684	2.5141	3.94476	0.00894508	-1.29397	0.240557
CNAG_03040	transketolase (3206 nt)	6.17859	5.95252	6.1717	8.03536	7.92248	8.29418	6.01691	6.00578	6.25916	3.95334	0.00573553	-1.00486	0.971084
CNAG_00057	fructose-1,6-bisphosphatase I (1641 nt)	7.08101	6.99404	7.31834	9.11032	8.86404	9.38843	7.04387	6.98712	7.42812	3.97183	0.00787388	1.0153	0.93942
CNAG_03679	hypothetical protein (835 nt)	6.20482	5.79083	6.08815	8.01345	7.77986	8.26988	5.19141	5.58645	5.89592	3.981	0.00648669	-1.38512	0.278226
CNAG_03007	hypothetical protein (1212 nt)	8.81475	8.3882	8.24426	10.483	10.3456	10.6448	9.30423	8.91423	9.46878	4.02427	0.0112904	1.67792	0.134254
CNAG_02182	D-lactaldehyde dehydrogenase (2873 nt)	7.30145	6.98488	7.21505	9.11956	8.9905	9.44922	8.31922	8.17268	8.67991	4.05388	0.00655287	2.33508	0.0666994
CNAG_07574	hypothetical protein (471 nt)	2.39825	2.34701	2.44785	4.28558	4.20905	4.7743	3.29282	3.60828	3.05906	4.0707	0.0210272	1.8952	0.117232
CNAG_01047	hypothetical protein (1347 nt)	6.14293	6.07232	6.32318	8.1905	7.82801	8.59943	6.66426	6.57046	6.97211	4.07416	0.0219946	1.47032	0.116131
CNAG_06868	phosphopyruvate hydratase (2122 nt)	5.25875	5.01342	4.54854	6.9143	6.95105	7.05045	4.92617	4.73147	5.08584	4.08885	0.0248777	-1.018	0.94796
CNAG_03688	hypothetical protein (1038 nt)	7.2643	7.00964	7.289	9.19802	9.04542	9.42485	6.81672	6.89638	7.07246	4.09856	0.0053124	-1.19675	0.224708
CNAG_04326	malate dehydrogenase (oxaloacetate-decarboxylating) (3044 nt)	4.83463	4.78206	4.88978	6.74903	6.63297	7.31652	4.89376	5.12066	5.30335	4.18148	0.0261561	1.20617	0.285876
CNAG_03082	cupin domain-containing protein (1056 nt)	4.62104	4.57054	4.71845	6.72804	6.49661	6.89261	5.18094	4.90685	5.29056	4.19619	0.00861606	1.4039	0.138233
CNAG_01743	hypothetical protein (1390 nt)	4.64534	4.78686	4.85705	6.89076	6.42246	7.19218	4.57984	4.45594	4.55464	4.20483	0.023607	-1.17523	0.149389
CNAG_06666	starch phosphorylase (4658 nt)	3.94841	3.70372	4.10645	6.07232	5.89592	6.01997	3.8	3.41417	3.91887	4.21795	0.00763942	-1.1555	0.498128
CNAG_00961	hypothetical protein (1978 nt)	4.82972	4.89889	4.96323	6.82958	6.82426	7.27356	4.8688	4.78986	5.10138	4.22374	0.0143734	1.01588	0.89674
CNAG_00247	alpha-aminoadipic semialdehyde synthase (3734 nt)	3.70672	3.62116	3.89579	5.72688	5.82087	5.93103	4.49526	4.49162	4.24393	4.24288	0.00448812	1.59003	0.0676422
CNAG_06759	dehydrogenase (2336 nt)	4.43637	4.35507	4.30182	6.42511	6.17606	6.76692	4.59706	4.64417	4.70234	4.26224	0.0178178	1.21709	0.0710554
CNAG_03771	DNA binding protein Ncp1 (4212 nt)	6.8399	6.77237	6.88305	8.82193	8.79976	9.15288	6.74903	6.72499	6.95658	4.26659	0.0103241	-1.01507	0.876494
CNAG_04443	hypothetical protein (1512 nt)	6.48556	6.26289	6.56252	8.49622	8.30945	8.81055	6.0032	5.93173	6.22613	4.29228	0.00733835	-1.30433	0.141251
CNAG_04351	methylmalonate-semialdehyde dehydrogenase (acylating) (2764 nt)	4.17655	4.12691	4.23886	6.25677	6.13067	6.50219	3.93538	3.82896	3.99789	4.33422	0.00956448	-1.1975	0.0991028
CNAG_05684	hypothetical protein (2760 nt)	5.97965	5.84029	5.85033	7.93817	7.72116	8.40203	6.44201	6.24003	6.46439	4.37829	0.0213675	1.40645	0.0763923
CNAG_05994	multidrug transporter (3076 nt)	4.84253	4.54308	4.629	6.73937	6.6143	7.05672	4.35269	4.33161	4.46718	4.38302	0.00588813	-1.2207	0.185859
CNAG_03114	hypothetical protein (1116 nt)	6.88437	6.72499	7.00565	8.9905	8.82193	9.21224	7.39297	7.24389	7.52371	4.39711	0.00532463	1.42918	0.0856357
CNAG_05387	galactose transporter (3157 nt)	3.97936	3.91132	4.02351	6.064	6.01691	6.2639	4.03045	4.10812	4.18649	4.41844	0.00573553	1.09958	0.200896
CNAG_06286	hypothetical protein (969 nt)	3.45336	3.68404	3.82018	5.61974	5.65275	6.12544	3.23738	3.45637	3.49511	4.42839	0.0077565	-1.19436	0.276216
CNAG_06668	mitochondrial protein (1670 nt)	5.45063	5.21829	5.63252	7.45806	7.36432	7.92248	5.40087	5.27337	5.89379	4.43154	0.00800333	1.06353	0.812785
CNAG_03667	hypothetical protein (1223 nt)	7.3592	7.12882	7.46592	9.38424	9.25726	9.77582	7.21658	6.81781	7.36982	4.45201	0.00747393	-1.13544	0.555438
CNAG_00052	hypothetical protein (721 nt)	5.6648	5.67499	6.24325	8.04951	7.70296	8.3164	5.1156	5.0397	6.00426	4.47518	0.00894508	-1.38943	0.430992
CNAG_02934	hypothetical protein (3212 nt)	1.3949	1.49292	1.10464	3.59034	3.37629	3.5164	1.49985	1.59302	1.61818	4.48008	0.00615752	1.18061	0.315342
CNAG_02230	phosphoketolase (4405 nt)	5.83413	5.52049	5.60377	7.60194	7.66178	8.1905	6.0417	5.8052	6.37461	4.48553	0.0115511	1.33889	0.246288
CNAG_00093	hypothetical protein (3062 nt)	5.074	4.93047	5.15363	7.15818	6.99228	7.51518	4.79075	4.63503	5.06237	4.49766	0.010513	-1.16742	0.36205
CNAG_02070	hypothetical protein (2326 nt)	6.32717	6.14433	6.42796	8.27456	8.26988	8.90289	6.41961	6.2963	6.86342	4.53978	0.0165135	1.17009	0.480601
CNAG_03495	hypothetical protein (1307 nt)	3.68071	3.36868	3.84461	5.63919	5.48598	6.32115	3.44779	3.57388	4.03045	4.54446	0.0171869	1.03721	0.890454
CNAG_01605	rossman fold oxidoreductase (1472 nt)	2.15623	2.29276	2.21004	4.452	4.24024	4.5566	2.0173	1.65165	2.37046	4.58399	0.00597611	-1.15392	0.573825
CNAG_01272	hypothetical protein (1827 nt)	5.49321	5.51335	5.65447	7.64196	7.65235	7.97186	6.70764	6.86459	7.05248	4.60024	0.00647222	2.49878	0.0498704
CNAG_06294	hypothetical protein (1829 nt)	5.63586	5.38186	5.82979	7.81648	7.75837	7.90755	5.98449	5.92038	5.85437	4.63198	0.0100933	1.23448	0.278226
CNAG_00139	hypothetical protein (1846 nt)	7.04691	6.8956	7.161	9.13796	9.02966	9.57735	7.17727	7.19078	7.50044	4.63902	0.0105595	1.19333	0.270484
CNAG_04760	cytoplasmic protein (1903 nt)	6.44201	6.22613	6.09173	8.45364	8.4159	8.56909	5.78751	5.971	5.89304	4.67918	0.00615752	-1.29185	0.159214
CNAG_07766	DNA polymerase lambda subunit (5050 nt)	2.94701	2.75973	2.82432	4.98808	4.60002	5.6319	2.52819	2.70998	2.51189	4.6902	0.0364455	-1.19776	0.138737
CNAG_01341	mannose-6-phosphate isomerase (1038 nt)	6.58007	6.32115	6.72101	8.67526	8.6056	9.04542	6.66194	6.5419	7.2445	4.7066	0.00573553	1.2103	0.499049
CNAG_02226	hypothetical protein (2548 nt)	3.11579	2.75593	2.6724	4.94666	4.88656	5.42269	3.01493	3.27283	3.2904	4.71503	0.00712014	1.26987	0.251136
CNAG_03002	hypothetical protein (868 nt)	5.84634	5.73347	5.55419	7.97831	7.92535	7.94487	5.58807	5.47897	5.6119	4.71801	0.00852621	-1.11087	0.361776
CNAG_04209	voltage-gated potassium channel protein beta-2 subunit (2149 nt)	6.85221	6.70925	6.86459	9.06564	8.92464	9.17824	7.49388	7.4071	7.58842	4.74857	0.00422177	1.61081	0.0418661
CNAG_06075	hypothetical protein (1124 nt)	9.07436	8.81475	9.22466	11.1052	10.9884	11.7848	9.67522	9.63959	10.1991	4.77289	0.0170336	1.74114	0.120455
CNAG_00866	transketolase (3344 nt)	5.41228	5.33564	5.42818	7.58199	7.42609	7.96165	5.63658	5.52013	5.83244	4.80504	0.0160444	1.20666	0.215009
CNAG_06577	hypothetical protein (2424 nt)	4.50215	4.25255	4.32595	6.49661	6.67953	6.70285	4.67291	4.79308	4.8391	4.81026	0.00422177	1.32698	0.0942303
CNAG_07939	hypothetical protein (1097 nt)	6.86459	6.80358	6.80358	8.92965	8.91423	9.47635	7.15469	7.0349	7.82654	4.8663	0.0201973	1.42878	0.31902
CNAG_00393	1,4-alpha-glucan-branching enzyme (3421 nt)	5.28033	5.33023	5.52049	7.61429	7.63561	7.74007	5.07808	4.95844	5.20097	4.87806	0.00454178	-1.22931	0.148337
CNAG_05310	nipsnap family protein (1488 nt)	2.59875	2.47687	3.00826	5.14554	4.81487	4.99049	2.83612	2.4071	3.19729	4.88721	0.00758431	1.08589	0.796975
CNAG_05251	hypothetical protein (1785 nt)	2.11349	1.93499	1.91295	4.47338	3.88171	4.53095	1.74426	0.846769	0.62811	4.95265	0.0176552	-1.88439	0.249909
CNAG_06374	malate dehydrogenase (oxaloacetate-decarboxylating)(NADP ) (2706 nt)	4.26729	3.76538	3.82673	6.26085	6.28656	6.24003	4.44495	4.54854	4.64374	4.95659	0.0170335	1.50797	0.163065
CNAG_04098	ATP-binding cassette, subfamily G (WHITE), member 2, PDR (6361 nt)	2.81239	2.69116	2.75593	4.97928	4.89298	5.34024	3.96255	3.84762	3.95539	4.98528	0.0116806	2.24808	0.0187465
CNAG_01594	glycine dehydrogenase (3734 nt)	5.16592	4.88656	4.81715	7.25107	7.3592	7.2365	5.30335	5.09165	5.05067	5.01313	0.00734305	1.14235	0.379308
CNAG_01417	hypothetical protein (1232 nt)	4.36221	4.19805	4.77715	6.88811	6.25292	7.2187	4.56098	4.01893	4.49862	5.06573	0.0167505	-1.06164	0.831234
CNAG_02864	hypothetical protein (1275 nt)	6.94612	7.08866	6.7647	9.25726	9.23306	9.40081	6.72948	6.76286	6.70614	5.14754	0.00508442	-1.14896	0.309253
CNAG_01846	flavoprotein (3272 nt)	5.59937	5.51696	5.6648	7.81055	7.77841	8.29816	5.42563	5.28707	5.62125	5.16462	0.0143617	-1.10885	0.418281
CNAG_02129	hypothetical protein (4212 nt)	6.62384	6.55484	6.47969	8.72561	8.89989	9.23306	6.88639	6.73779	7.1684	5.27826	0.0117482	1.2996	0.212894
CNAG_07308	hypothetical protein (2328 nt)	3.32161	2.9876	3.57476	5.63372	5.38849	6.20836	2.94441	2.74274	2.9424	5.45986	0.0110544	-1.33621	0.258739
CNAG_04206	hypothetical protein (1097 nt)	6.37348	6.2639	6.5734	8.77947	8.62386	9.16472	6.73206	6.62618	6.98488	5.47335	0.00733835	1.29904	0.169697
CNAG_04981	catalase (2831 nt)	6.26487	6.0663	6.06718	8.42693	8.45922	8.89425	6.28024	6.31162	6.41961	5.50478	0.00847348	1.15219	0.192727
CNAG_00827	ribose 5-phosphate isomerase (1289 nt)	0.718116	1.02822	1.64156	3.39054	3.66309	3.81877	2.20748	1.87395	2.58699	5.63663	0.0173719	2.13392	0.136579
CNAG_03142	hypothetical protein (966 nt)	9.47635	9.26739	9.6942	11.7631	11.7121	12.4721	9.51157	9.52395	9.96213	5.66917	0.0137534	1.13805	0.542246
CNAG_03113	trehalose synthase (3830 nt)	4.3772	4.40501	4.7371	6.90537	6.78948	7.3666	4.4441	4.4183	4.80894	5.71222	0.00712014	1.03575	0.858917
CNAG_00834	phosphatidylserine decarboxylase (1803 nt)	5.0907	4.99161	4.94942	7.45374	7.29928	7.9191	4.91268	4.70871	5.31508	5.84336	0.0157163	-1.02225	0.922014
CNAG_04163	hypothetical protein (3679 nt)	4.69053	4.51675	4.5109	6.92561	7.00095	7.51661	4.40291	4.03759	4.56273	5.9587	0.0130274	-1.17962	0.417949
CNAG_03572	opsin 1 (1917 nt)	5.19645	5.04046	5.21679	7.67944	7.57145	7.94064	5.63372	5.35679	5.84285	5.9764	0.00573553	1.37543	0.187933
CNAG_04744	mannose-6-phosphate isomerase, class I (1719 nt)	5.67499	5.47169	5.85235	8.1501	7.97968	8.61044	5.54843	5.57146	6.07282	5.98104	0.00805564	1.04576	0.851093
CNAG_06347	hypothetical protein (1882 nt)	5.35081	4.92049	4.973	7.56872	7.32172	8.11304	6.1189	5.85142	6.7422	6.00596	0.0109114	2.2285	0.127293
CNAG_07775	hypothetical protein (1429 nt)	3.82242	3.8394	4.03499	6.36252	6.34069	6.77788	3.38941	3.225	3.66672	6.04088	0.00707994	-1.38693	0.156513
CNAG_06074	cytoplasmic protein (1397 nt)	5.31239	5.04469	5.11827	7.7421	7.56073	7.96717	5.50363	5.30787	5.60629	6.05538	0.00486424	1.24328	0.172269
CNAG_02526	hypothetical protein (1112 nt)	1.56222	0.985075	1.99411	4.09717	3.81299	4.45352	1.81963	1.43468	1.25358	6.09417	0.0141624	-1.00777	0.984842
CNAG_01751	hypothetical protein (1034 nt)	5.8698	5.79595	6.20897	8.44166	8.24426	9.02966	6.18609	5.96783	6.5014	6.12037	0.0115511	1.19765	0.422259
CNAG_03873	hypothetical protein (2113 nt)	5.3623	5.35779	5.88838	7.97186	7.9191	8.57742	4.88376	4.76	5.66746	6.14736	0.00762249	-1.34949	0.433635
CNAG_07902	AAT family amino acid transporter (2620 nt)	5.6018	5.23101	5.16396	7.96165	7.92706	7.98148	5.74179	5.34222	5.53588	6.16658	0.0123008	1.15485	0.46769
CNAG_00995	hypothetical protein (2679 nt)	5.52724	5.5007	5.46914	7.92927	8.02485	8.45922	5.50745	5.30994	5.69681	6.22794	0.0149827	1.00396	0.978502
CNAG_05299	oxidoreductase (1294 nt)	1.44561	1.07003	1.25585	3.94662	3.40018	4.38349	0.981899	1.568	2.06299	6.28945	0.0194578	1.21459	0.613346
CNAG_06578	hypothetical protein (1209 nt)	8.50188	8.03155	8.13869	10.8814	10.8546	11.0099	9.17464	9.04542	9.00314	6.45884	0.00892674	1.80295	0.102373
CNAG_06574	antiphagocytic protein 1 (1055 nt)	4.05081	3.94573	3.77441	6.60692	6.47912	6.7647	3.87993	3.42405	4.0861	6.46773	0.00422177	-1.09199	0.718768
CNAG_02049	proline dehydrogenase (2310 nt)	0.337692	0.350242	0.310988	3.06042	2.8656	3.16172	0.233072	0.303712	0.143584	6.48126	0.00784378	-1.07638	0.285504
CNAG_01052	hypothetical protein (2240 nt)	5.94382	5.86326	6.41961	8.66745	8.50188	9.15982	6.08729	6.08221	6.49931	6.50173	0.00673425	1.10755	0.676186
CNAG_03566	hypothetical protein (1643 nt)	6.55166	6.23145	6.41098	9.05759	8.87227	9.38049	6.66138	6.40269	7.23122	6.52247	0.00573553	1.28973	0.425735
CNAG_05653	malate synthase A (2447 nt)	4.66431	4.51936	4.47295	7.31313	7.24235	7.22766	3.93705	3.62007	3.78116	6.53795	0.00422177	-1.70856	0.0650703
CNAG_04459	hypothetical protein (1367 nt)	1.89626	1.249	1.4208	4.23088	3.56409	4.9118	2.17981	1.55658	3.11334	6.55943	0.0256058	1.69493	0.382353
CNAG_01031	hypothetical protein (1670 nt)	4.97366	4.56377	4.81023	7.38631	7.32628	7.80458	4.5137	4.3772	5.04151	6.60321	0.00533553	-1.1007	0.717846
CNAG_02591	hypothetical protein (745 nt)	4.61671	4.83463	4.16903	7.27356	7.04249	7.51798	4.45664	4.629	4.39519	6.67094	0.00695277	-1.03276	0.898152
CNAG_02751	short-chain dehydrogenase (1980 nt)	5.03303	5.05251	5.30497	7.74007	7.36025	8.51889	4.97999	4.85763	5.29376	6.69416	0.0298715	-1.0617	0.734572
CNAG_02768	hypothetical protein (1021 nt)	3.85776	3.47381	4.46614	6.65102	6.34651	7.05332	3.99311	3.87382	4.3934	6.73204	0.0119429	1.11281	0.778717
CNAG_05167	hypothetical protein (701 nt)	8.85414	8.67041	8.99524	11.4045	11.2856	12.1058	9.29607	9.07436	9.58797	6.76796	0.0165135	1.3943	0.181966
CNAG_04106	hypothetical protein (1949 nt)	4.00796	3.87786	4.41587	6.7422	6.49046	7.357	3.72666	3.49511	4.53999	6.78647	0.0107479	-1.13286	0.760668
CNAG_01446	hypothetical protein (862 nt)	10.5258	10.2668	10.6448	13.1414	13.1414	13.4535	11.2423	11.0857	11.6791	6.80357	0.00448812	1.81072	0.110994
CNAG_06220	allergen (1376 nt)	7.65472	7.31962	7.62842	10.1893	9.9901	10.8022	8.66387	8.40203	9.02202	6.93035	0.0130715	2.23725	0.0820856
CNAG_06817	NCS2 family nucleobase:cation symporter-2 (2895 nt)	2.26681	2.29166	2.35197	5.19585	5.07931	5.20938	2.37533	2.22593	2.29623	7.25029	0.00268496	-1.00299	0.960248
CNAG_01954	aldo-keto reductase (1496 nt)	1.19848	0.951857	1.4628	4.27927	3.48939	4.42441	1.63473	1.69957	2.4535	7.26005	0.0143734	1.65277	0.22245
CNAG_06396	hypothetical protein (928 nt)	3.38196	3.33944	3.92187	6.2639	5.95484	7.07757	4.001	3.34167	4.45352	7.38371	0.0165333	1.30523	0.527922
CNAG_05683	hypothetical protein (1028 nt)	5.92038	5.62397	6.17264	8.72808	8.4838	9.19355	6.43932	6.19584	6.83115	7.44435	0.00671261	1.49807	0.201902
CNAG_04737	hypothetical protein (4214 nt)	5.34222	4.9713	5.38783	7.99948	8.09964	8.42395	6.07232	6.09657	6.29533	7.67714	0.00450525	1.89337	0.0783908
CNAG_01735	hypothetical protein (703 nt)	8.59943	8.33198	8.45922	11.2856	11.2423	11.6975	9.61395	9.56028	10.085	7.70012	0.00575502	2.44448	0.0763923
CNAG_00054	hypothetical protein (1272 nt)	1.29027	1.30199	1.81722	4.40091	3.98637	4.93604	0.975284	1.03613	1.50722	7.84233	0.0105595	-1.22854	0.442634
CNAG_01102	oxidoreductase (1461 nt)	6.95238	6.68849	7.238	9.59857	9.58797	10.6321	6.66664	6.53575	7.18593	7.88941	0.0191803	-1.12001	0.686048
CNAG_04891	hypothetical protein (1844 nt)	2.26103	2.02153	2.28786	5.19782	5.18162	5.1799	3.49974	3.00826	3.25081	7.97955	0.00752141	2.08898	0.0719354
CNAG_05383	hypothetical protein (2197 nt)	3.70068	3.83832	4.03685	6.77666	6.59016	7.26132	3.26897	3.17122	3.64723	8.09725	0.00845411	-1.41044	0.169107
CNAG_01585	hypothetical protein (936 nt)	4.47413	4.01446	3.75717	7.16288	6.7836	7.41477	4.76168	4.2971	5.14873	8.21633	0.00615752	1.57343	0.254304
CNAG_06109	hypothetical protein (1818 nt)	6.97541	6.65618	6.7438	9.6942	9.55224	10.2864	7.05248	6.75796	7.31962	8.29638	0.0109216	1.19049	0.423011
CNAG_06453	benzodiazapine receptor (1397 nt)	8.09964	7.76866	8.01731	10.9884	10.6556	11.4267	8.87227	8.67526	9.27682	8.34947	0.0103573	1.97189	0.0969717
CNAG_03058	hypothetical protein (773 nt)	9.91767	9.63959	10.0492	12.9963	12.6676	13.1414	10.1742	10.1893	10.7464	8.37607	0.00450525	1.4153	0.234578
CNAG_04903	hypothetical protein (1719 nt)	4.89963	4.5418	4.55464	7.76327	7.47978	8.24426	5.19707	4.67803	5.47997	8.96156	0.00848263	1.36888	0.332797
CNAG_03492	hypothetical protein (2048 nt)	5.18589	5.18222	4.77646	8.09964	8.0934	8.54011	5.25498	4.82665	5.28654	9.16539	0.0045554	1.05302	0.823095
CNAG_00879	glutamate dehydrogenase (4512 nt)	6.46803	6.4608	6.49565	9.55224	9.77582	9.72348	6.84649	6.9553	6.69236	9.24724	0.00573553	1.28037	0.145996
CNAG_00485	hypothetical protein (1636 nt)	4.29075	3.85417	4.29565	7.33511	7.17868	7.78273	4.26318	3.97087	4.9041	9.7494	0.00532463	1.17489	0.645327
CNAG_04632	uracil permease (2680 nt)	3.3074	3.19199	3.20751	6.47969	6.43003	6.68849	2.79081	2.59365	2.84377	9.8294	0.00448812	-1.40726	0.087269
CNAG_02685	hypothetical protein (2267 nt)	2.88017	2.43787	3.07726	5.99852	5.68544	6.63297	2.64717	2.62882	3.37629	9.89849	0.00871886	1.06117	0.869155
CNAG_00575	catalase (2699 nt)	4.53819	4.39191	4.56034	7.57966	7.50961	8.37903	4.58077	4.62581	5.05662	10.028	0.019316	1.19548	0.378735
CNAG_04307	urate oxidase (1734 nt)	4.66551	5.02411	4.95909	8.29418	8.08131	8.25773	5.06359	5.11613	4.93245	10.0433	0.00448812	1.11302	0.457845
CNAG_03143	hypothetical protein (1417 nt)	9.06564	8.85414	9.15982	12.4145	12.0437	12.7736	9.3536	9.40081	9.86952	10.4401	0.00880653	1.42877	0.190438
CNAG_00315	HHE domain-containing protein (1192 nt)	5.2002	4.452	4.68737	8.13217	7.86776	8.59693	4.74395	4.21762	5.0243	10.6967	0.00588588	-1.08515	0.82588
CNAG_00932	hypothetical protein (1305 nt)	4.48462	3.99533	4.38349	7.58842	7.46796	8.07792	4.40816	4.31188	5.14933	10.7303	0.0053124	1.26165	0.501531
CNAG_06372	hypothetical protein (2363 nt)	2.22372	2.18127	2.71868	5.75743	5.23487	6.42165	2.91981	2.71868	3.53124	10.7786	0.0142152	1.60439	0.223463
CNAG_06169	hypothetical protein (3200 nt)	3.59857	3.48542	3.55981	6.91655	6.76839	7.50349	3.47479	3.31882	3.98149	11.431	0.0148347	1.0308	0.902545
CNAG_06576	allergen (1868 nt)	8.54011	8.12374	8.3164	11.7263	11.5006	12.3032	8.42395	8.37903	8.86853	11.4449	0.00845411	1.17317	0.468227
CNAG_03408	hypothetical protein (2902 nt)	3.89415	3.64669	3.49974	7.18593	7.01937	7.67302	2.83815	2.82594	3.5925	12.2319	0.00580457	-1.51012	0.270484
CNAG_06267	hypothetical protein (2442 nt)	2.08368	1.69957	1.94655	5.65447	5.17624	5.95381	2.35988	2.05657	2.30783	12.8608	0.00763411	1.25831	0.219118
CNAG_04322	hypothetical protein (921 nt)	7.20627	7.05045	7.20982	10.772	10.46	11.5006	7.04691	7.00565	7.6404	13.5043	0.0192944	1.05371	0.839184
CNAG_00091	hypothetical protein (2256 nt)	5.83296	5.49856	5.99165	9.3339	9.20772	10.1893	5.72392	5.59999	6.59419	13.9536	0.0112081	1.14735	0.729259
CNAG_04105	hypothetical protein (615 nt)	8.21156	8.05146	8.3838	11.9411	11.7263	12.5467	8.67041	8.54519	9.31985	14.4776	0.00989362	1.54707	0.240917
CNAG_04758	amt family ammonium transporter (2262 nt)	3.78269	3.24777	3.36233	7.27476	7.39686	7.36176	2.5673	2.66496	2.40082	14.725	0.00875674	-1.89199	0.0995847
CNAG_00848	hypothetical protein (4373 nt)	4.88155	4.79117	4.64313	8.52835	8.44882	9.13796	5.28528	4.97874	5.75389	15.2749	0.00976113	1.4818	0.257309
CNAG_02225	glucan 1,3-beta-glucosidase (2396 nt)	1.9177	1.95514	1.89626	6.00426	5.62043	5.97527	2.55629	1.94808	2.50857	15.3868	0.00763942	1.33294	0.313855
CNAG_01542	taurine catabolism dioxygenase TauD (1840 nt)	2.69613	2.83949	2.93074	6.82426	6.70614	6.96241	2.56291	1.9177	2.25992	16.0981	0.00268496	-1.48996	0.202612
CNAG_00984	glucose and ribitol dehydrogenase (2015 nt)	5.94913	5.43361	5.9614	9.66281	9.42485	10.3456	6.20423	5.91151	6.8196	16.3327	0.00712014	1.44433	0.33138
CNAG_07765	hypothetical protein (989 nt)	1.35238	0.958369	1.72315	5.65098	4.76119	6.07282	1.10183	0.250312	0.641092	17.7576	0.0115158	-1.60239	0.247528
CNAG_07448	urea transporter (2759 nt)	3.0886	2.71644	2.7802	6.90688	7.04079	7.13261	2.09462	2.15084	2.12225	17.9388	0.00422177	-1.66922	0.111219
CNAG_06238	glutathione S-transferase (1771 nt)	2.37297	2.1203	2.54368	6.53486	6.25196	7.25624	2.86409	2.33028	2.45989	20.1873	0.0103573	1.1533	0.524693
CNAG_05939	hypothetical protein (2384 nt)	3.5182	3.3942	3.40312	7.72404	7.34846	8.27173	3.59707	3.53973	3.98832	20.2929	0.0142805	1.2057	0.33766
CNAG_07802	class III aminotransferase (2150 nt)	1.84769	1.3972	1.7322	7.01097	6.8399	7.13095	2.17398	1.77461	1.8543	40.3616	0.00422177	1.21022	0.356732
CNAG_03759	conidiation-specific protein 6 (922 nt)	2.38113	2.26978	1.79847	7.59109	7.25253	8.1471	2.00435	2.10475	3.9445	45.6891	0.0049757	1.44868	0.629856
CNAG_03477	hypothetical protein (1860 nt)	4.04128	3.9162	3.71116	3.49039	3.24777	2.83472	4.99983	5.16788	5.30283	-1.62291	0.0843581	2.4071	0.0418661
CNAG_05932	peptidyl-prolyl cis-trans isomerase D (1798 nt)	7.90141	7.65016	7.63036	7.42812	7.50599	7.17981	8.81475	8.77333	8.61572	-1.27988	0.0928106	2.01013	0.0479014
CNAG_07377	transformation/transcription domain-associated protein (12326 nt)	3.64669	3.68498	3.40532	3.21039	3.32967	3.25214	5.20232	5.13392	5.2274	-1.24395	0.0922679	3.05016	0.0498704
CNAG_01750	hsp72-like protein (2774 nt)	7.24929	7.27188	6.95658	6.94183	6.97211	7.0229	8.52532	8.45922	8.23243	-1.13312	0.280494	2.3725	0.0439534
CNAG_00550	DNA mismatch repair protein MSH5 (4069 nt)	2.62521	2.79007	2.35725	2.40283	2.7263	2.56475	4.41055	4.41949	4.20242	-1.01834	0.900514	3.37131	0.0455969
CNAG_02311	hypothetical protein (2197 nt)	0.97167	1.01267	1.13587	1.00203	1.12747	0.979565	2.22593	2.21864	2.0173	-1.00258	0.966478	2.16428	0.0398663
CNAG_05159	hypothetical protein (2887 nt)	2.32557	2.19301	2.34079	2.72873	2.0815	2.64156	3.21718	3.47791	3.34048	1.14668	0.505057	2.0831	0.0420337
CNAG_03461	hypothetical protein (2441 nt)	2.60226	2.80063	2.46124	2.98972	2.91524	2.80063	3.9156	3.90598	4.14549	1.2146	0.131427	2.58049	0.0418661
CNAG_06139	hypothetical protein (2756 nt)	2.39637	2.40082	2.48554	2.74274	3.06733	2.72423	3.7705	3.67666	3.78916	1.33532	0.0954539	2.49296	0.0149873
CNAG_02217	chitin synthase (5145 nt)	1.63473	1.68656	1.82139	1.91295	2.51973	2.29869	2.6979	2.79007	2.74133	1.4435	0.131427	2.04043	0.0418661
CNAG_01742	aquaporin-associated protein (2039 nt)	1.1999	1.24068	1.06754	2.5302	2.21004	3.09656	2.7674	2.61434	2.95811	2.71866	0.0544431	3.05373	0.0420337

## Sheet: DAVID_Chart
Category	Term	Count	P Value	Genes	Bonferroni (P value)	Benjamini (P value)	FDR (P value)
GOTERM_BP_DIRECT	GO:0000463~maturation of LSU-rRNA from tricistronic rRNA transcript (SSU-rRNA, 5.8S rRNA, LSU-rRNA)	3	0.0412941	CNAG_06318, CNAG_03975, CNAG_03624	0.99821	0.594917	39.5644
GOTERM_BP_DIRECT	GO:0000466~maturation of 5.8S rRNA from tricistronic rRNA transcript (SSU-rRNA, 5.8S rRNA, LSU-rRNA)	3	0.0412941	CNAG_06318, CNAG_03975, CNAG_03624	0.99821	0.594917	39.5644
GOTERM_BP_DIRECT	GO:0001522~pseudouridine synthesis	5	0.0168511	CNAG_01168, CNAG_04259, CNAG_05270, CNAG_01049, CNAG_01623	0.921857	0.346144	18.3677
GOTERM_BP_DIRECT	GO:0002098~tRNA wobble uridine modification	3	0.0759542	CNAG_03005, CNAG_02122, CNAG_05086	0.999993	0.731945	61.0665
GOTERM_BP_DIRECT	GO:0005975~carbohydrate metabolic process	20	0.00230375	CNAG_06313, CNAG_02351, CNAG_06923, CNAG_05652, CNAG_07600, CNAG_03266, CNAG_06666, CNAG_01239, CNAG_02230, CNAG_06659, CNAG_05607, CNAG_03412, CNAG_02225, CNAG_00827, CNAG_01745, CNAG_04631, CNAG_06515, CNAG_04744, CNAG_05138, CNAG_07559	0.292461	0.10892	2.71666
GOTERM_BP_DIRECT	GO:0006108~malate metabolic process	4	0.0150846	CNAG_06638, CNAG_06374, CNAG_03266, CNAG_04326	0.897709	0.366177	16.5988
GOTERM_BP_DIRECT	GO:0006364~rRNA processing	15	2.46536e-10	CNAG_06766, CNAG_05151, CNAG_05473, CNAG_06919, CNAG_07439, CNAG_00775, CNAG_02412, CNAG_01300, CNAG_07494, CNAG_01437, CNAG_02982, CNAG_06412, CNAG_05597, CNAG_03724, CNAG_03300	3.69805e-08	3.69805e-08	2.94405e-07
GOTERM_BP_DIRECT	GO:0008152~metabolic process	19	0.00358418	CNAG_02439, CNAG_04470, CNAG_04206, CNAG_02427, CNAG_02417, CNAG_06935, CNAG_03040, CNAG_03806, CNAG_00866, CNAG_03564, CNAG_00371, CNAG_06238, CNAG_00524, CNAG_02226, CNAG_00490, CNAG_04043, CNAG_04067, CNAG_00800, CNAG_02768	0.416431	0.125976	4.19716
GOTERM_BP_DIRECT	GO:0032447~protein urmylation	3	0.0759542	CNAG_03005, CNAG_02122, CNAG_05086	0.999993	0.731945	61.0665
GOTERM_BP_DIRECT	GO:0034227~tRNA thio-modification	3	0.0412941	CNAG_03005, CNAG_02122, CNAG_05086	0.99821	0.594917	39.5644
GOTERM_BP_DIRECT	GO:0042254~ribosome biogenesis	12	6.76207e-08	CNAG_06273, CNAG_03577, CNAG_06468, CNAG_01812, CNAG_07657, CNAG_01715, CNAG_02328, CNAG_03246, CNAG_07413, CNAG_04259, CNAG_01432, CNAG_01049	1.01431e-05	5.07154e-06	8.07503e-05
GOTERM_BP_DIRECT	GO:0055085~transmembrane transport	28	0.0434321	CNAG_01953, CNAG_06817, CNAG_03912, CNAG_05130, CNAG_03215, CNAG_01422, CNAG_01681, CNAG_04103, CNAG_05994, CNAG_06204, CNAG_05993, CNAG_02355, CNAG_07538, CNAG_00815, CNAG_01354, CNAG_00904, CNAG_04474, CNAG_04142, CNAG_06758, CNAG_02050, CNAG_07519, CNAG_03426, CNAG_03110, CNAG_04632, CNAG_01946, CNAG_01384, CNAG_03794, CNAG_03061	0.99872	0.565068	41.1543
GOTERM_CC_DIRECT	GO:0005654~nucleoplasm	3	0.0476978	CNAG_06318, CNAG_03975, CNAG_03624	0.883563	0.301207	36.6973
GOTERM_CC_DIRECT	GO:0005730~nucleolus	18	4.96246e-13	CNAG_02378, CNAG_03975, CNAG_06318, CNAG_06468, CNAG_03521, CNAG_01104, CNAG_03246, CNAG_07413, CNAG_00775, CNAG_02412, CNAG_03624, CNAG_01148, CNAG_03284, CNAG_03762, CNAG_06379, CNAG_01437, CNAG_01810, CNAG_01432	2.18359e-11	2.18359e-11	4.64295e-10
GOTERM_CC_DIRECT	GO:0019013~viral nucleocapsid	7	0.0264676	CNAG_01168, CNAG_02378, CNAG_07630, CNAG_05228, CNAG_04259, CNAG_07864, CNAG_01049	0.692802	0.210261	22.1946
GOTERM_CC_DIRECT	GO:0030529~intracellular ribonucleoprotein complex	8	0.000833078	CNAG_01168, CNAG_02378, CNAG_07630, CNAG_02301, CNAG_01437, CNAG_05228, CNAG_07864, CNAG_01049	0.0360065	0.0121492	0.776699
GOTERM_CC_DIRECT	GO:0030687~preribosome, large subunit precursor	4	0.00318331	CNAG_06318, CNAG_03975, CNAG_03762, CNAG_03624	0.130893	0.0344643	2.93892
GOTERM_CC_DIRECT	GO:0032040~small-subunit processome	7	4.56919e-06	CNAG_06766, CNAG_05151, CNAG_02982, CNAG_07439, CNAG_06007, CNAG_02162, CNAG_03820	0.000201025	0.000100517	0.00427474
GOTERM_MF_DIRECT	GO:0003676~nucleic acid binding	42	1.70791e-05	CNAG_01564, CNAG_03513, CNAG_02877, CNAG_02182, CNAG_06126, CNAG_04580, CNAG_01132, CNAG_02583, CNAG_00166, CNAG_07609, CNAG_06742, CNAG_03414, CNAG_07676, CNAG_06206, CNAG_02960, CNAG_07651, CNAG_05371, CNAG_02338, CNAG_01810, CNAG_01140, CNAG_07362, CNAG_03964, CNAG_03055, CNAG_02437, CNAG_03521, CNAG_00809, CNAG_00785, CNAG_03129, CNAG_02843, CNAG_04147, CNAG_02502, CNAG_02204, CNAG_01729, CNA…	0.00363128	0.00181729	0.0216254
GOTERM_MF_DIRECT	GO:0003723~RNA binding	21	0.00443384	CNAG_03675, CNAG_02378, CNAG_06919, CNAG_00603, CNAG_02810, CNAG_00764, CNAG_05270, CNAG_00116, CNAG_06741, CNAG_01168, CNAG_04072, CNAG_02301, CNAG_01437, CNAG_06228, CNAG_05627, CNAG_03603, CNAG_00086, CNAG_06248, CNAG_04729, CNAG_01623, CNAG_03724	0.611906	0.210714	5.47172
GOTERM_MF_DIRECT	GO:0003824~catalytic activity	16	0.097116	CNAG_02439, CNAG_02427, CNAG_04944, CNAG_07808, CNAG_03246, CNAG_05292, CNAG_03040, CNAG_02407, CNAG_00613, CNAG_00866, CNAG_00371, CNAG_02809, CNAG_06112, CNAG_06494, CNAG_06515, CNAG_00800	1	0.910884	72.5741
GOTERM_MF_DIRECT	GO:0003899~DNA-directed RNA polymerase activity	12	0.000443432	CNAG_03636, CNAG_03521, CNAG_06611, CNAG_01189, CNAG_01810, CNAG_01179, CNAG_04513, CNAG_07409, CNAG_05936, CNAG_06641, CNAG_03634, CNAG_07536	0.0901467	0.031	0.560074
GOTERM_MF_DIRECT	GO:0004386~helicase activity	18	6.40376e-06	CNAG_00809, CNAG_00785, CNAG_04580, CNAG_00764, CNAG_07381, CNAG_00166, CNAG_07609, CNAG_04147, CNAG_02502, CNAG_06206, CNAG_07676, CNAG_07651, CNAG_01140, CNAG_05627, CNAG_05360, CNAG_03603, CNAG_03205, CNAG_04729	0.00136307	0.00136307	0.00810886
GOTERM_MF_DIRECT	GO:0004471~malate dehydrogenase (decarboxylating) (NAD+) activity	3	0.043222	CNAG_06638, CNAG_06374, CNAG_04326	0.999918	0.791649	42.8509
GOTERM_MF_DIRECT	GO:0005215~transporter activity	7	0.0836137	CNAG_06817, CNAG_05632, CNAG_00036, CNAG_04632, CNAG_01742, CNAG_06758, CNAG_01681	1	0.929837	66.9024
GOTERM_MF_DIRECT	GO:0008168~methyltransferase activity	13	0.0153601	CNAG_06919, CNAG_02185, CNAG_01104, CNAG_01416, CNAG_02182, CNAG_03342, CNAG_02583, CNAG_00259, CNAG_01629, CNAG_02317, CNAG_03310, CNAG_04777, CNAG_06002	0.963009	0.482848	17.8001
GOTERM_MF_DIRECT	GO:0016491~oxidoreductase activity	29	0.089112	CNAG_05299, CNAG_00605, CNAG_03983, CNAG_05521, CNAG_04313, CNAG_03476, CNAG_01896, CNAG_01952, CNAG_01112, CNAG_02592, CNAG_01097, CNAG_03865, CNAG_06169, CNAG_01102, CNAG_01846, CNAG_06759, CNAG_07965, CNAG_01558, CNAG_02996, CNAG_00269, CNAG_04112, CNAG_07745, CNAG_02958, CNAG_07765, CNAG_06511, CNAG_00247, CNAG_00984, CNAG_05115, CNAG_02000	1	0.916679	69.331
GOTERM_MF_DIRECT	GO:0016846~carbon-sulfur lyase activity	3	0.043222	CNAG_04206, CNAG_04043, CNAG_02768	0.999918	0.791649	42.8509
GOTERM_MF_DIRECT	GO:0043021~ribonucleoprotein complex binding	3	0.043222	CNAG_06318, CNAG_03975, CNAG_03624	0.999918	0.791649	42.8509
GOTERM_MF_DIRECT	GO:0045735~nutrient reservoir activity	3	0.043222	CNAG_06286, CNAG_03083, CNAG_03082	0.999918	0.791649	42.8509
INTERPRO	IPR000629:RNA helicase, ATP-dependent, DEAD-box, conserved site	13	5.02883e-08	CNAG_02502, CNAG_07676, CNAG_07651, CNAG_00809, CNAG_01140, CNAG_05627, CNAG_03603, CNAG_05360, CNAG_00764, CNAG_00166, CNAG_07609, CNAG_04147, CNAG_04729	5.40082e-05	5.40082e-05	8.01768e-05
INTERPRO	IPR000868:Isochorismatase-like	4	0.00724736	CNAG_02439, CNAG_02427, CNAG_06935, CNAG_00800	0.999595	0.508446	10.9497
INTERPRO	IPR001395:Aldo/keto reductase	8	0.00867256	CNAG_01954, CNAG_05299, CNAG_04112, CNAG_03983, CNAG_05521, CNAG_01896, CNAG_01952, CNAG_04209	0.999913	0.513059	12.9662
INTERPRO	IPR001650:Helicase, C-terminal	20	0.00159577	CNAG_00809, CNAG_00785, CNAG_04580, CNAG_00764, CNAG_07381, CNAG_00166, CNAG_07609, CNAG_04147, CNAG_06741, CNAG_02502, CNAG_06206, CNAG_07676, CNAG_07651, CNAG_01729, CNAG_01140, CNAG_05627, CNAG_05360, CNAG_03603, CNAG_03205, CNAG_04729	0.820076	0.24864	2.51409
INTERPRO	IPR001680:WD40 repeat	23	0.0259259	CNAG_03975, CNAG_06318, CNAG_01898, CNAG_04802, CNAG_06798, CNAG_03342, CNAG_07439, CNAG_00775, CNAG_06748, CNAG_07957, CNAG_03124, CNAG_06005, CNAG_03645, CNAG_07951, CNAG_00822, CNAG_06684, CNAG_01600, CNAG_04694, CNAG_02982, CNAG_01432, CNAG_05101, CNAG_03881, CNAG_01262	1	0.722616	34.2165
INTERPRO	IPR001891:Malic oxidoreductase	3	0.043689	CNAG_06638, CNAG_06374, CNAG_04326	1	0.853263	50.9449
INTERPRO	IPR002347:Glucose/ribitol dehydrogenase	11	0.0166094	CNAG_02935, CNAG_02751, CNAG_01102, CNAG_04657, CNAG_06074, CNAG_01097, CNAG_06511, CNAG_00984, CNAG_02000, CNAG_05095, CNAG_01605	1	0.631881	23.4353
INTERPRO	IPR002818:ThiJ/PfpI	4	0.00724736	CNAG_00575, CNAG_06602, CNAG_01686, CNAG_04981	0.999595	0.508446	10.9497
INTERPRO	IPR003397:Mitochondrial inner membrane translocase subunit Tim17/Tim22/Tim23/peroxisomal protein PMP24	3	0.0801306	CNAG_01397, CNAG_01756, CNAG_04287	1	0.963933	73.596
INTERPRO	IPR004045:Glutathione S-transferase, N-terminal	6	0.00459757	CNAG_06238, CNAG_02263, CNAG_00921, CNAG_00417, CNAG_00139, CNAG_01893	0.992911	0.390379	7.0836
INTERPRO	IPR004840:Amino acid permease, conserved site	3	0.0801306	CNAG_01118, CNAG_07902, CNAG_05119	1	0.963933	73.596
INTERPRO	IPR005612:CCAAT-binding factor	3	0.043689	CNAG_07657, CNAG_04365, CNAG_04298	1	0.853263	50.9449
INTERPRO	IPR006045:Cupin 1	3	0.043689	CNAG_06286, CNAG_03083, CNAG_03082	1	0.853263	50.9449
INTERPRO	IPR006073:GTP binding domain	6	0.0075631	CNAG_06468, CNAG_02720, CNAG_07413, CNAG_07537, CNAG_02880, CNAG_00638	0.999712	0.493114	11.4002
INTERPRO	IPR006913:Glutathione-dependent formaldehyde-activating enzyme/centromere protein V	3	0.043689	CNAG_04206, CNAG_04043, CNAG_02768	1	0.853263	50.9449
INTERPRO	IPR007109:Brix domain	5	0.00113078	CNAG_01187, CNAG_07630, CNAG_01791, CNAG_02382, CNAG_01593	0.703333	0.215751	1.7877
INTERPRO	IPR007148:Small-subunit processome, Utp12	3	0.043689	CNAG_03602, CNAG_05101, CNAG_03124	1	0.853263	50.9449
INTERPRO	IPR008928:Six-hairpin glycosidase-like	7	0.01428	CNAG_04944, CNAG_02079, CNAG_05077, CNAG_06494, CNAG_05411, CNAG_04879, CNAG_03785	1	0.61919	20.4921
INTERPRO	IPR010987:Glutathione S-transferase, C-terminal-like	6	0.0116384	CNAG_06238, CNAG_02263, CNAG_00921, CNAG_02714, CNAG_00417, CNAG_01893	0.999997	0.567511	17.0262
INTERPRO	IPR011047:Quinonprotein alcohol dehydrogenase-like superfamily	6	0.0320026	CNAG_02982, CNAG_07439, CNAG_01432, CNAG_03881, CNAG_03124, CNAG_03645	1	0.766724	40.4632
INTERPRO	IPR011051:RmlC-like cupin domain	9	0.000175499	CNAG_01341, CNAG_06286, CNAG_01108, CNAG_03083, CNAG_02690, CNAG_04744, CNAG_03082, CNAG_03999, CNAG_06512	0.171801	0.0460324	0.279439
INTERPRO	IPR011545:DNA/RNA helicase, DEAD/DEAH box type, N-terminal	19	3.26499e-06	CNAG_00809, CNAG_00785, CNAG_04580, CNAG_00764, CNAG_00166, CNAG_07609, CNAG_04147, CNAG_06741, CNAG_02502, CNAG_06206, CNAG_07676, CNAG_07651, CNAG_01729, CNAG_05627, CNAG_01140, CNAG_05360, CNAG_03603, CNAG_03205, CNAG_04729	0.00350047	0.00116819	0.0052054
INTERPRO	IPR012301:Malic enzyme, N-terminal	3	0.043689	CNAG_06638, CNAG_06374, CNAG_04326	1	0.853263	50.9449
INTERPRO	IPR012302:Malic enzyme, NAD-binding	3	0.043689	CNAG_06638, CNAG_06374, CNAG_04326	1	0.853263	50.9449
INTERPRO	IPR012341:Six-hairpin glycosidase	4	0.093792	CNAG_04944, CNAG_05077, CNAG_06494, CNAG_05411	1	0.977124	79.1999
INTERPRO	IPR013096:Cupin 2, conserved barrel	3	0.043689	CNAG_01341, CNAG_03083, CNAG_03082	1	0.853263	50.9449
INTERPRO	IPR013126:Heat shock protein 70 family	4	0.0687807	CNAG_01404, CNAG_00334, CNAG_01750, CNAG_05199	1	0.947325	67.8943
INTERPRO	IPR013781:Glycoside hydrolase, catalytic domain	9	0.0285407	CNAG_05607, CNAG_00393, CNAG_03412, CNAG_02225, CNAG_02351, CNAG_05652, CNAG_05138, CNAG_04879, CNAG_06659	1	0.741308	36.9762
INTERPRO	IPR014001:Helicase, superfamily 1/2, ATP-binding domain	20	0.00159577	CNAG_00809, CNAG_00785, CNAG_04580, CNAG_00764, CNAG_07381, CNAG_00166, CNAG_07609, CNAG_04147, CNAG_06741, CNAG_02502, CNAG_06206, CNAG_07676, CNAG_07651, CNAG_01729, CNAG_01140, CNAG_05627, CNAG_05360, CNAG_03603, CNAG_03205, CNAG_04729	0.820076	0.24864	2.51409
INTERPRO	IPR014014:RNA helicase, DEAD-box type, Q motif	13	2.8669e-06	CNAG_02502, CNAG_07676, CNAG_00809, CNAG_00785, CNAG_01140, CNAG_05627, CNAG_03603, CNAG_05360, CNAG_00764, CNAG_00166, CNAG_04147, CNAG_04729, CNAG_06741	0.00307432	0.00153834	0.00457073
INTERPRO	IPR014710:RmlC-like jelly roll fold	8	0.00305504	CNAG_01341, CNAG_06286, CNAG_03083, CNAG_02690, CNAG_04744, CNAG_03082, CNAG_03999, CNAG_06512	0.962602	0.305891	4.76116
INTERPRO	IPR015943:WD40/YVTN repeat-like-containing domain	27	0.0168172	CNAG_06318, CNAG_01898, CNAG_07439, CNAG_06748, CNAG_00775, CNAG_07957, CNAG_06005, CNAG_07951, CNAG_04694, CNAG_02982, CNAG_03602, CNAG_01432, CNAG_05101, CNAG_03881, CNAG_04062, CNAG_01262, CNAG_03975, CNAG_04802, CNAG_06798, CNAG_03342, CNAG_03124, CNAG_03645, CNAG_00822, CNAG_06684, CNAG_03878, CNAG_01600, CNAG_02655	1	0.616609	23.6929
INTERPRO	IPR016040:NAD(P)-binding domain	39	0.00245267	CNAG_00605, CNAG_06355, CNAG_04862, CNAG_02182, CNAG_02751, CNAG_00932, CNAG_06074, CNAG_06645, CNAG_06374, CNAG_03476, CNAG_00879, CNAG_06672, CNAG_00275, CNAG_01097, CNAG_04938, CNAG_06169, CNAG_04523, CNAG_06638, CNAG_03974, CNAG_01102, CNAG_03266, CNAG_04326, CNAG_06759, CNAG_07965, CNAG_01558, CNAG_05095, CNAG_00269, CNAG_02935, CNAG_07745, CNAG_06556, CNAG_01745, CNAG_04657, CNAG_02673, CNA…	0.928453	0.313927	3.83955
INTERPRO	IPR017926:Glutamine amidotransferase	6	0.00256298	CNAG_01877, CNAG_07502, CNAG_00743, CNAG_07373, CNAG_04192, CNAG_00976	0.936465	0.291441	4.00894
INTERPRO	IPR017986:WD40-repeat-containing domain	26	0.0144882	CNAG_06318, CNAG_01898, CNAG_07439, CNAG_06748, CNAG_00775, CNAG_07957, CNAG_06005, CNAG_07951, CNAG_04694, CNAG_02982, CNAG_03602, CNAG_01432, CNAG_05101, CNAG_03881, CNAG_04062, CNAG_01262, CNAG_03975, CNAG_04802, CNAG_06798, CNAG_03342, CNAG_03124, CNAG_03645, CNAG_00822, CNAG_06684, CNAG_03878, CNAG_01600	1	0.60228	20.7594
INTERPRO	IPR019775:WD40 repeat, conserved site	15	0.0228384	CNAG_03975, CNAG_06318, CNAG_01898, CNAG_04802, CNAG_03342, CNAG_00775, CNAG_06748, CNAG_03124, CNAG_00822, CNAG_06684, CNAG_04694, CNAG_02982, CNAG_01432, CNAG_05101, CNAG_01262	1	0.693202	30.8122
INTERPRO	IPR020471:Aldo/keto reductase subgroup	6	0.0169841	CNAG_05299, CNAG_04112, CNAG_03983, CNAG_05521, CNAG_01896, CNAG_01952	1	0.601434	23.8992
INTERPRO	IPR023210:NADP-dependent oxidoreductase domain	8	0.0116238	CNAG_01954, CNAG_05299, CNAG_04112, CNAG_03983, CNAG_05521, CNAG_01896, CNAG_01952, CNAG_04209	0.999996	0.592183	17.0066
INTERPRO	IPR025313:Domain of unknown function DUF4217	4	0.00724736	CNAG_05627, CNAG_03603, CNAG_00764, CNAG_04729	0.999595	0.508446	10.9497
PIR_SUPERFAMILY	PIRSF000106:malic enzyme	3	0.0789601	CNAG_06638, CNAG_06374, CNAG_04326	0.994826	0.994826	56.6386
SMART	SM00320:WD40	23	0.00237986	CNAG_03975, CNAG_06318, CNAG_01898, CNAG_04802, CNAG_06798, CNAG_03342, CNAG_07439, CNAG_00775, CNAG_06748, CNAG_07957, CNAG_03124, CNAG_06005, CNAG_03645, CNAG_07951, CNAG_00822, CNAG_06684, CNAG_01600, CNAG_04694, CNAG_02982, CNAG_01432, CNAG_05101, CNAG_03881, CNAG_01262	0.278504	0.0783662	2.7618
SMART	SM00487:DEXDc	20	0.000140808	CNAG_00809, CNAG_00785, CNAG_04580, CNAG_00764, CNAG_07381, CNAG_00166, CNAG_07609, CNAG_04147, CNAG_06741, CNAG_02502, CNAG_06206, CNAG_07676, CNAG_07651, CNAG_01729, CNAG_01140, CNAG_05627, CNAG_05360, CNAG_03603, CNAG_03205, CNAG_04729	0.0191072	0.00959967	0.165383
SMART	SM00490:HELICc	20	6.16003e-05	CNAG_00809, CNAG_00785, CNAG_04580, CNAG_00764, CNAG_07381, CNAG_00166, CNAG_07609, CNAG_04147, CNAG_06741, CNAG_02502, CNAG_06206, CNAG_07676, CNAG_07651, CNAG_01729, CNAG_01140, CNAG_05627, CNAG_05360, CNAG_03603, CNAG_03205, CNAG_04729	0.00840399	0.00840399	0.072382
SMART	SM00879:SM00879	5	0.000565487	CNAG_01187, CNAG_07630, CNAG_01791, CNAG_02382, CNAG_01593	0.0745671	0.0255005	0.662666
SMART	SM00919:SM00919	3	0.0312792	CNAG_06638, CNAG_06374, CNAG_04326	0.987141	0.515975	31.1703
SMART	SM01178:SM01178	4	0.00434564	CNAG_05627, CNAG_03603, CNAG_00764, CNAG_04729	0.449347	0.112485	4.99025
SMART	SM01274:SM01274	3	0.0312792	CNAG_06638, CNAG_06374, CNAG_04326	0.987141	0.515975	31.1703
UP_KEYWORDS	DNA-directed RNA polymerase	12	0.000419237	CNAG_03636, CNAG_03521, CNAG_06611, CNAG_01189, CNAG_01810, CNAG_01179, CNAG_04513, CNAG_07409, CNAG_05936, CNAG_06641, CNAG_03634, CNAG_07536	0.0502695	0.0102624	0.482341
UP_KEYWORDS	Glycosidase	8	0.0289173	CNAG_03412, CNAG_02225, CNAG_02351, CNAG_05411, CNAG_05652, CNAG_00696, CNAG_06659, CNAG_03785	0.972928	0.402863	28.7055
UP_KEYWORDS	Helicase	20	0.000393872	CNAG_00809, CNAG_00785, CNAG_04580, CNAG_00764, CNAG_07381, CNAG_00166, CNAG_07609, CNAG_04147, CNAG_06741, CNAG_02502, CNAG_06206, CNAG_07676, CNAG_07651, CNAG_01729, CNAG_01140, CNAG_05627, CNAG_05360, CNAG_03603, CNAG_03205, CNAG_04729	0.0473005	0.0120409	0.453218
UP_KEYWORDS	Hydrolase	57	0.00114978	CNAG_04580, CNAG_06029, CNAG_01239, CNAG_06741, CNAG_03412, CNAG_02960, CNAG_01140, CNAG_05627, CNAG_05411, CNAG_03603, CNAG_02966, CNAG_01090, CNAG_00809, CNAG_00057, CNAG_00785, CNAG_05652, CNAG_06694, CNAG_00455, CNAG_03565, CNAG_01519, CNAG_06659, CNAG_02880, CNAG_02502, CNAG_06497, CNAG_02225, CNAG_05360, CNAG_01604, CNAG_00696, CNAG_04070, CNAG_03205, CNAG_01584, CNAG_03213, CNAG_06935, CNA…	0.131949	0.0233081	1.31777
UP_KEYWORDS	Methyltransferase	13	0.060309	CNAG_06774, CNAG_06919, CNAG_04571, CNAG_03342, CNAG_02583, CNAG_03762, CNAG_01629, CNAG_02317, CNAG_03310, CNAG_00086, CNAG_04777, CNAG_03724, CNAG_06002	0.999524	0.572638	51.1909
UP_KEYWORDS	Pyridoxal phosphate	7	0.0396065	CNAG_06448, CNAG_07808, CNAG_05260, CNAG_07802, CNAG_06666, CNAG_01594, CNAG_04469	0.993062	0.462775	37.2479
UP_KEYWORDS	Ribosome biogenesis	12	1.71695e-08	CNAG_06318, CNAG_03975, CNAG_03284, CNAG_06468, CNAG_03762, CNAG_04072, CNAG_01437, CNAG_07413, CNAG_01432, CNAG_02412, CNAG_03624, CNAG_05597	2.11185e-06	2.11185e-06	1.97975e-05
UP_KEYWORDS	RNA-binding	9	0.0666192	CNAG_06774, CNAG_04072, CNAG_01437, CNAG_05627, CNAG_02122, CNAG_03603, CNAG_00764, CNAG_06248, CNAG_04729	0.999792	0.571724	54.8394
UP_KEYWORDS	rRNA processing	11	1.14474e-07	CNAG_06318, CNAG_03975, CNAG_03284, CNAG_01300, CNAG_04571, CNAG_03762, CNAG_06379, CNAG_01437, CNAG_02412, CNAG_03624, CNAG_05597	1.40801e-05	7.0401e-06	0.000131995
UP_KEYWORDS	tRNA processing	8	7.22504e-05	CNAG_06774, CNAG_03005, CNAG_06379, CNAG_03342, CNAG_02122, CNAG_01665, CNAG_05086, CNAG_06997	0.00884775	0.00295799	0.0832776
UP_KEYWORDS	Viral nucleoprotein	7	0.0691991	CNAG_01168, CNAG_02378, CNAG_07630, CNAG_05228, CNAG_04259, CNAG_07864, CNAG_01049	0.999852	0.5515	56.2579
UP_KEYWORDS	Virion	7	0.0691991	CNAG_01168, CNAG_02378, CNAG_07630, CNAG_05228, CNAG_04259, CNAG_07864, CNAG_01049	0.999852	0.5515	56.2579
UP_KEYWORDS	WD repeat	12	0.000419237	CNAG_00822, CNAG_06318, CNAG_03975, CNAG_01600, CNAG_03342, CNAG_02982, CNAG_07439, CNAG_01432, CNAG_03881, CNAG_03124, CNAG_03645, CNAG_01262	0.0502695	0.0102624	0.482341
